# Supplementary material for: Physicochemical, Microbial, and Volatile Compound Characteristics of Gochujang, Fermented Red Pepper Paste, Produced by Traditional Cottage Industries
Source: MDPI journal article supplement (doi:10.3390/foods11030375), 2022-01-27
Supplement: s1 [file s1]

Research Article

# Physicochemical, Microbial, and Volatile Compound Characteristics of *Gochujang*, Fermented Red Pepper Paste, Produced by Traditional Cottage Industries

Srinivasan Ramalingam <sup>1,†</sup>, Ashutosh Bahuguna <sup>1,†</sup>, SeMi Lim <sup>1</sup>, Jong-Suk Lee <sup>2</sup>, Ah-ryeong Joe <sup>1</sup>, So-Young Kim <sup>3</sup>, Myunghee Kim <sup>1,\*</sup>

<sup>1</sup> Department of Food Science and Technology, Yeungnam University, Gyeongsan 38541, Korea; sribt27@gmail.com (S.R.); ashubahuguna@gmail.com (A.B.); thfvkalfpeh7@naver.com (S.L.); whdkkfud12@naver.com (A.-r.J.)

<sup>2</sup> Division of Food & Nutrition and Cook, Taegu Science University, Daegu 41453, Korea; jslee1213@ynu.ac.kr

<sup>3</sup> Department of Agrofood Resources, National Institute of Agricultural Sciences, Rural Development Administration, Wanju 55365, Korea; foodksy@korea.kr

\* Correspondence: foodtech@ynu.ac.kr; Tel.: +82-53-810-2958

† Both authors contributed equally to this work.

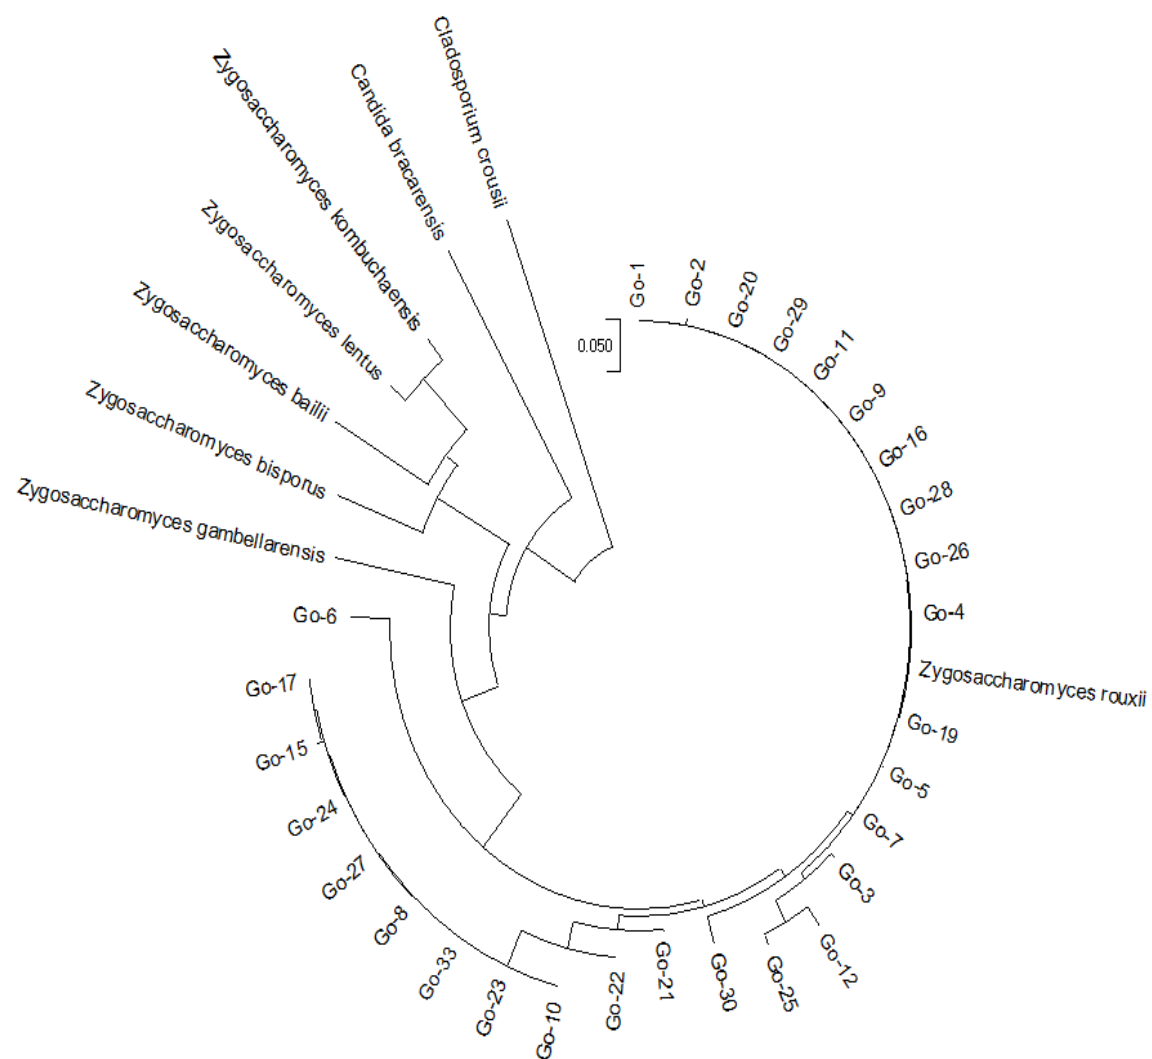

**Figure S1.** Phylogenetic tree analyses of the ITS sequences of the *Zygosaccharomyces rouxii* isolated from *gochujang* products constructed in MEGA 6 software by employing UPGMA method.

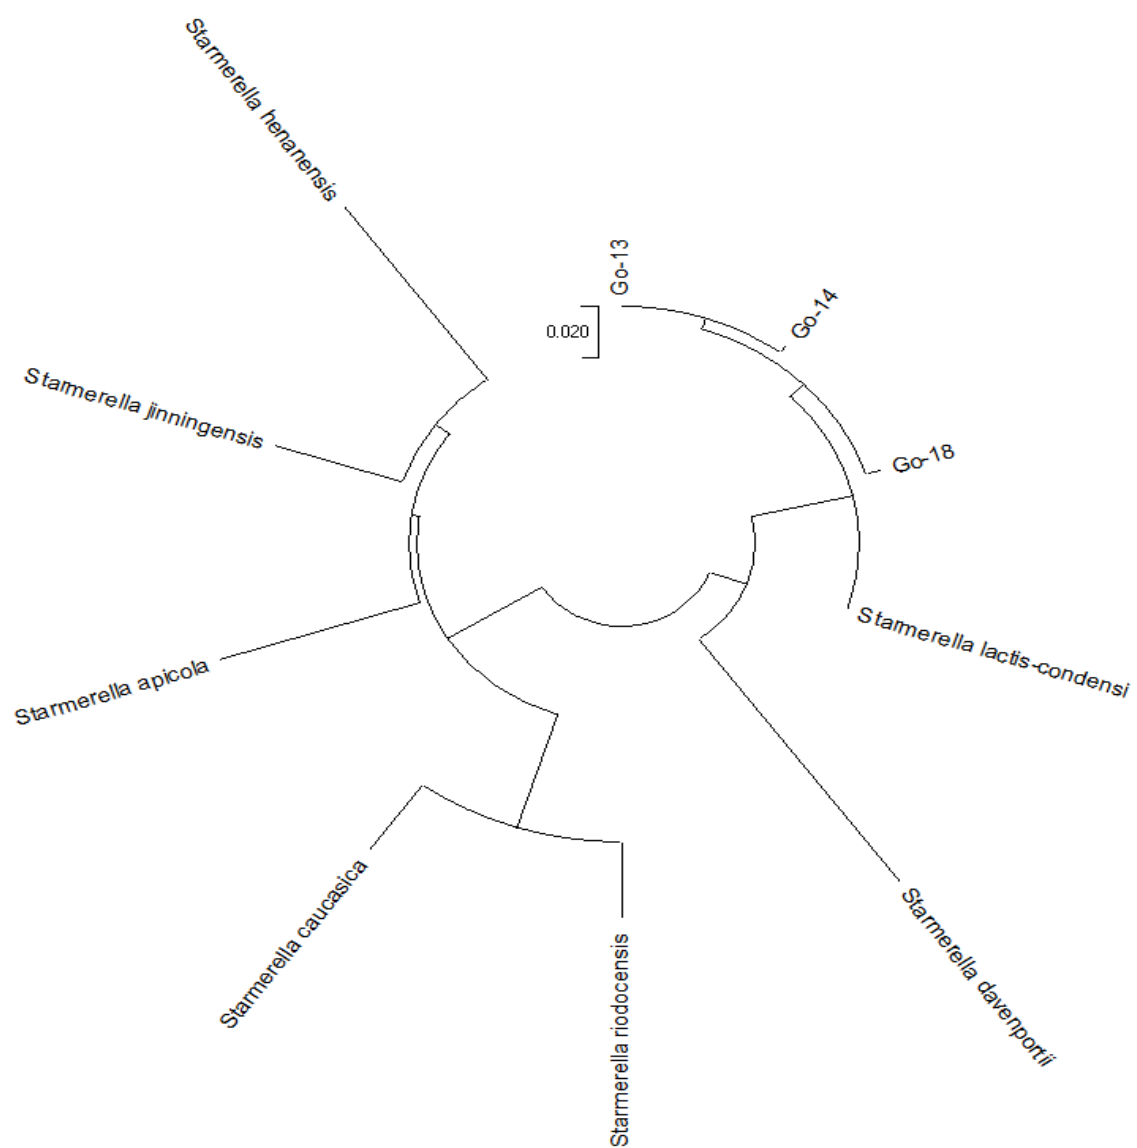

**Figure S2.** Phylogenetic tree analyses of the ITS sequences of the *Starmerella lactis-condensi* isolated from gochujang products constructed in MEGA 6 software by employing UPGMA method.

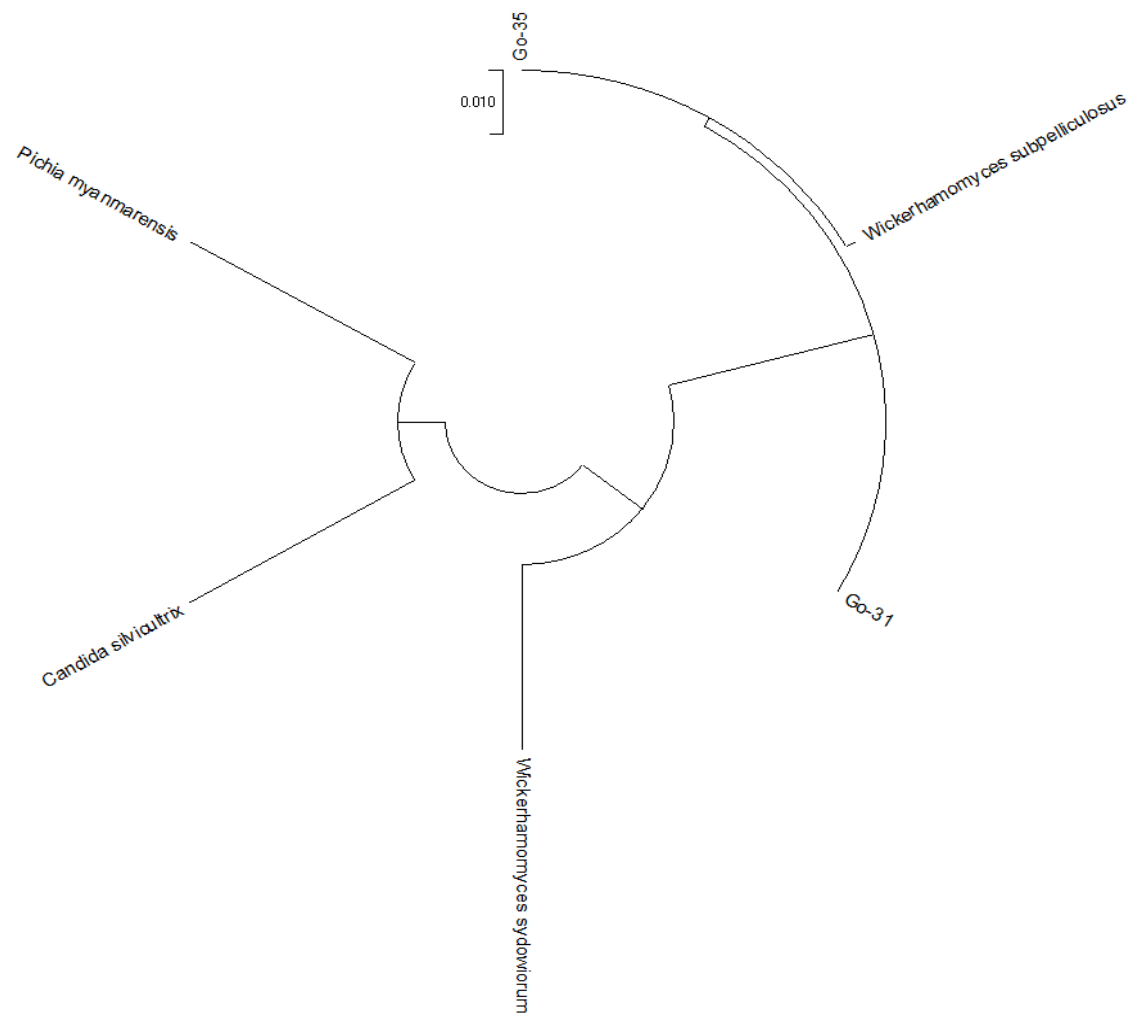

**Figure S3.** Phylogenetic tree analyses of the ITS sequences of the *Wickerhamomyces subpelliculosus* isolated from gochujang products constructed in MEGA 6 software by employing UPGMA method.

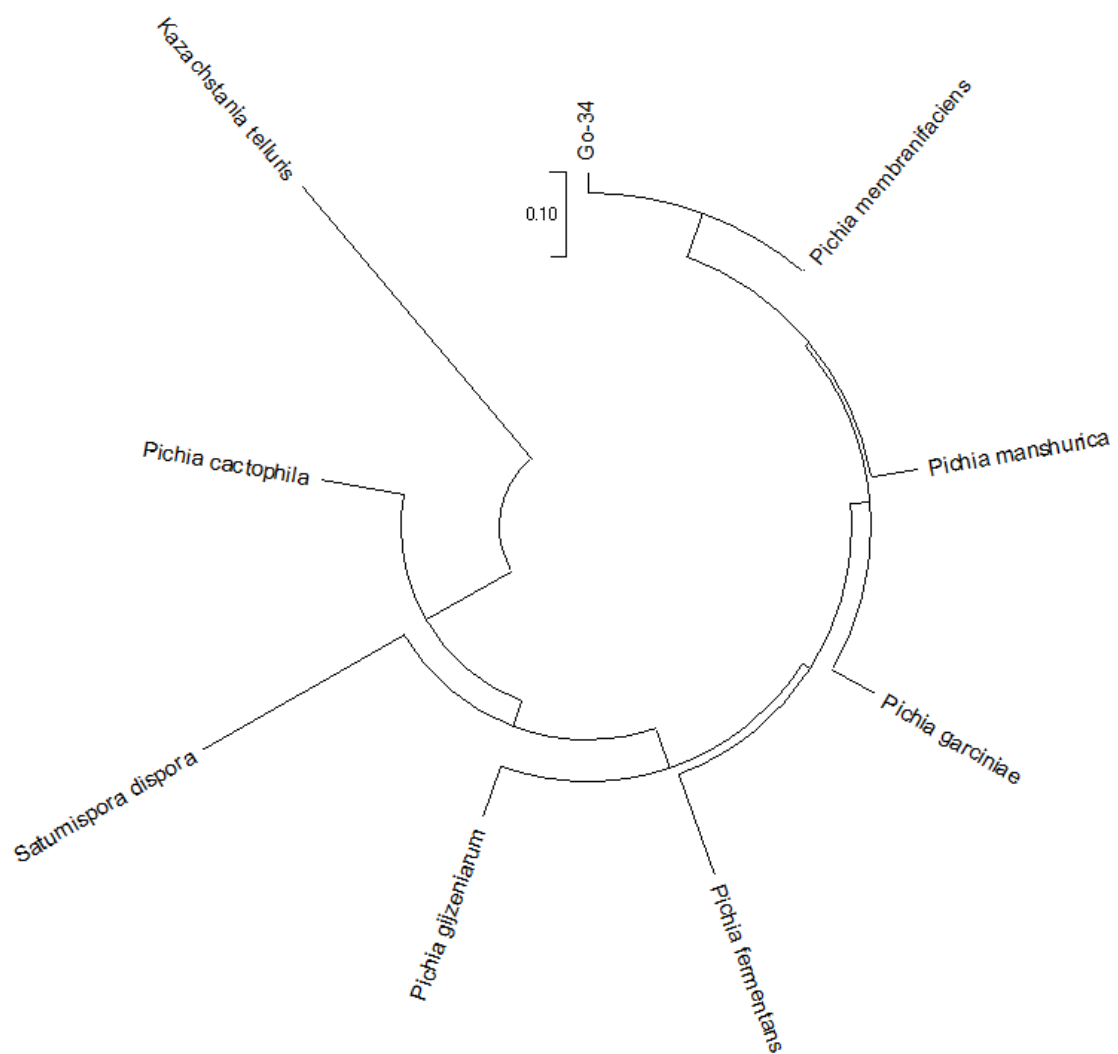

**Figure S4.** Phylogenetic tree analyses of the ITS sequences of the *Pichia membranifaciens* isolated from *gochujang* products constructed in MEGA 6 software by employing UPGMA method.

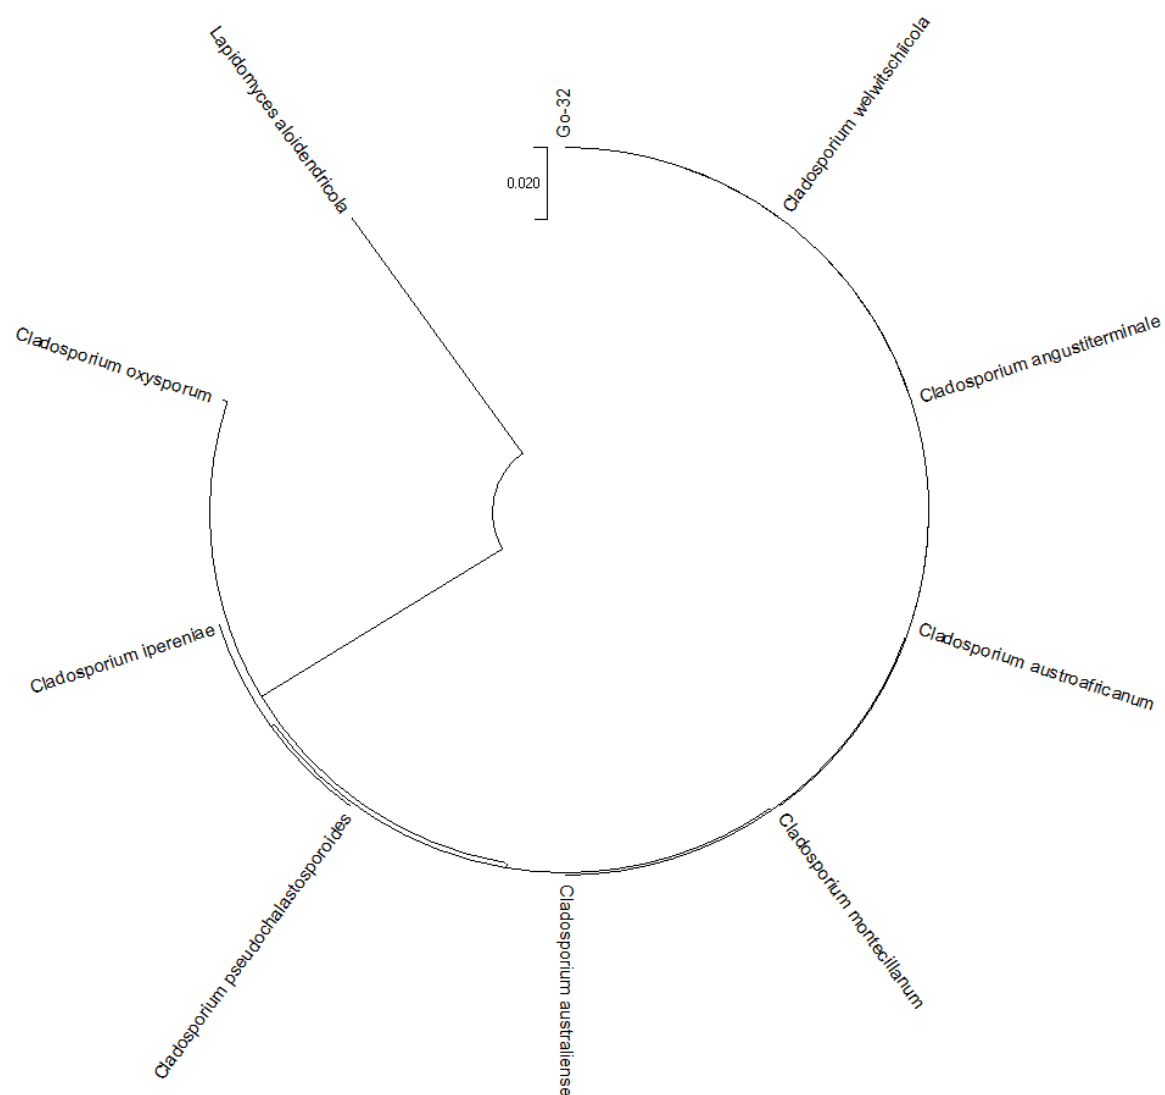

**Figure S5.** Phylogenetic tree analyses of the ITS sequences of the *Cladosporium welwitschiicola* isolated from *gochujang* products constructed in MEGA 6 software by employing UPGMA method.

**Table S1.** Various alcohol contents in *gochujang* products.

| Product code | Methanol (%) | Ethanol (%) | 1-Propanol (%) | 1-Butanol (%) | 1-Pentanol (%) | Total |
|--------------|--------------|-------------|----------------|---------------|----------------|-------|
| Go-1         | 0.000        | 3.157       | ND*            | ND            | ND             | 3.157 |
| Go-2         | 0.113        | 0.391       | ND             | ND            | ND             | 0.504 |
| Go-3         | 0.120        | 0.139       | ND             | ND            | ND             | 0.259 |
| Go-4         | 0.078        | 0.426       | ND             | ND            | ND             | 0.504 |
| Go-5         | 0.064        | 1.723       | 0.005          | ND            | 0.002          | 1.795 |
| Go-6         | 0.093        | 1.084       | 0.004          | 0.003         | 0.003          | 1.186 |
| Go-7         | 0.047        | 2.767       | 0.016          | 0.007         | 0.003          | 2.840 |
| Go-8         | 0.027        | 1.117       | 0.004          | 0.003         | ND             | 1.151 |
| Go-9         | 0.038        | 1.159       | 0.005          | 0.001         | ND             | 1.204 |
| Go-10        | 0.031        | 2.342       | 0.008          | 0.001         | 0.002          | 2.384 |
| Go-11        | 0.060        | 2.392       | 0.006          | ND            | 0.002          | 2.461 |
| Go-12        | 0.026        | 4.010       | ND             | 0.006         | 0.004          | 4.047 |
| Go-13        | 0.022        | 1.183       | ND             | ND            | 0.002          | 1.206 |
| Go-14        | 0.012        | 0.869       | 0.003          | 0.002         | 0.002          | 0.888 |
| Go-15        | 0.023        | 0.874       | 0.005          | 0.002         | 0.001          | 0.906 |
| Go-16        | ND           | 0.000       | ND             | ND            | ND             | 0.000 |
| Go-17        | 0.022        | 1.375       | 0.007          | 0.004         | 0.002          | 1.411 |
| Go-18        | 0.087        | 1.802       | ND             | ND            | ND             | 1.889 |
| Go-19        | 0.000        | 0.120       | ND             | ND            | ND             | 0.120 |
| Go-20        | 0.059        | 0.438       | ND             | ND            | 0.001          | 0.498 |
| Go-21        | 0.008        | 0.318       | ND             | ND            | 0.002          | 0.327 |
| Go-22        | 0.021        | 0.598       | ND             | ND            | 0.000          | 0.618 |
| Go-23        | 0.076        | 3.219       | 0.014          | 0.010         | 0.005          | 3.324 |
| Go-24        | 0.032        | 1.218       | ND             | ND            | ND             | 1.250 |

|               |                  |                  |                   |                   |                   |                  |
|---------------|------------------|------------------|-------------------|-------------------|-------------------|------------------|
| Go-25         | 0.135            | 0.841            | ND                | ND                | 0.001             | 0.977            |
| Go-26         | 0.078            | 4.278            | ND                | ND                | ND                | 4.356            |
| Go-27         | 0.048            | 2.365            | 0.006             | 0.005             | ND                | 2.424            |
| Go-28         | 0.019            | 0.880            | 0.004             | 0.002             | 0.002             | 0.908            |
| Go-29         | 0.020            | 0.624            | 0.009             | 0.002             | ND                | 0.656            |
| Go-30         | 0.028            | 0.392            | 0.007             | ND                | ND                | 0.426            |
| Go-31         | 0.050            | 3.090            | 0.015             | ND                | ND                | 3.155            |
| Go-32         | 0.037            | 0.351            | ND                | ND                | ND                | 0.388            |
| Go-33         | 0.036            | 4.944            | 0.008             | 0.002             | 0.002             | 4.991            |
| Go-34         | 0.023            | 1.446            | 0.004             | 0.001             | ND                | 1.474            |
| Go-35         | 0.047            | 1.547            | 0.005             | ND                | 0.001             | 1.600            |
| Mean $\pm$ SD | 0.045 $\pm$ 0.05 | 1.528 $\pm$ 1.23 | 0.007 $\pm$ 0.002 | 0.003 $\pm$ 0.002 | 0.002 $\pm$ 0.001 | 1.580 $\pm$ 1.28 |

ND-not detected.



**Table S2.** Various volatile compounds found in *gochujang* products.

| Peak Number | Retention Time (min) | Area (%) | Compound Name                         |
|-------------|----------------------|----------|---------------------------------------|
|             |                      |          | <b>Go-1</b>                           |
| 1           | 7.677                | 0.49     | ethyl acetate                         |
| 2           | 9.138                | 43.94    | ethanol                               |
| 3           | 15.971               | 0.28     | 1-propanol, 2-methyl-                 |
| 4           | 18.982               | 0.14     | 1-propene, 3,3'-thiobis-              |
| 5           | 19.922               | 0.30     | cyclopentasiloxane, decamethyl-       |
| 6           | 22.896               | 1.39     | 1-butanol, 3-methyl-                  |
| 7           | 24.496               | 0.24     | hexanoic acid, ethyl ester            |
| 8           | 25.567               | 0.13     | 1,3,6-octatriene, 3,7-dimethyl-, (e)- |
| 9           | 25.748               | 0.35     | styrene                               |
| 10          | 27.342               | 0.15     | 1,3-dithiane                          |
| 11          | 27.556               | 0.13     | 2-butanone, 3-hydroxy-                |
| 12          | 29.390               | 0.05     | 2(1h)-pyrimidinone, 4-(methylamino)-  |
| 13          | 29.790               | 0.09     | 1-butanol                             |
| 14          | 30.156               | 0.09     | dimethyl pyrazine                     |
| 15          | 31.128               | 1.54     | cyclohexasiloxane, dodecamethyl-      |
| 16          | 32.293               | 0.13     | 1-hexanol                             |
| 17          | 32.481               | 0.13     | tridecane, 2-methyl-, nonanal         |
| 18          | 34.082               | 0.19     | 4-methylpentyl 2-methylbutanoate      |
| 19          | 34.730               | 0.05     | nonanal                               |
| 20          | 35.276               | 0.11     | butanoic acid, 3-methyl-, hexyl ester |

|    |        |      |                                               |
|----|--------|------|-----------------------------------------------|
| 21 | 35.505 | 0.13 | pyrazine, trimethyl-                          |
| 22 | 37.460 | 0.27 | Octanoic acid, ethyl ester                    |
| 23 | 38.446 | 0.07 | 1-Octen-3-ol                                  |
| 24 | 38.829 | 0.33 | 1H-Imidazole, 1,4-dimethyl-                   |
| 25 | 39.540 | 0.06 | 1-Tetradecanamine                             |
| 26 | 39.681 | 0.06 | (4Z)-2-Methyl-4-Decene                        |
| 27 | 40.020 | 0.48 | 2,3,5,6 Tetramethyl Pyrazine                  |
| 28 | 40.110 | 0.73 | Diallyl disulphide                            |
| 29 | 40.448 | 0.28 | (Z)-1-Allyl-2-(prop-1-en-1-yl)disulfane       |
| 30 | 40.895 | 0.30 | Ethyl tridecanoate                            |
| 31 | 41.356 | 0.11 | Hydrazinecarbothioamide, N-ethyl-             |
| 32 | 41.474 | 0.23 | (3E,5E)-Hepta-3,5-dien-2-one                  |
| 33 | 41.803 | 1.03 | Tetradecamethyl-cycloheptasiloxane            |
| 34 | 42.551 | 0.20 | Benzaldehyde                                  |
| 35 | 42.709 | 0.17 | Hexanoic acid, hexyl ester                    |
| 36 | 43.165 | 0.08 | Thiodiglycol                                  |
| 37 | 43.759 | 0.10 | Nonanoic acid, ethyl ester                    |
| 38 | 44.385 | 0.09 | Cyclohexene, 1-methyl-4-(1-methylethylidene)- |
| 39 | 46.064 | 0.15 | 2-Butanone, 3-hydroxy-                        |
| 40 | 46.768 | 0.24 | Trisulfide, methyl 2-propenyl                 |
| 41 | 46.908 | 0.07 | Pyridine, 4-methoxy-                          |
| 42 | 47.034 | 0.28 | Hexadecanoic acid, ethyl ester                |
| 43 | 47.559 | 0.07 | Dodecane, 2,6,10-trimethyl-                   |
| 44 | 48.075 | 1.10 | 2-Acetyl-4,4-dimethyl-cyclopent-2-enone       |

|    |        |      |                                                        |
|----|--------|------|--------------------------------------------------------|
| 45 | 48.659 | 0.10 | 1-Cyclohexene-1-carboxaldehyde, 2,6,6-trimethyl-       |
| 46 | 49.658 | 0.15 | Benzeneacetaldehyde                                    |
| 47 | 49.815 | 0.17 | Decanoic acid, ethyl ester                             |
| 48 | 50.038 | 0.16 | 1,3-Cyclohexadiene-1-carboxaldehyde, 2,6,6-trimethyl-  |
| 49 | 50.307 | 0.23 | Silanediol, dimethyl-                                  |
| 50 | 50.810 | 0.22 | 2-Furanmethanol                                        |
| 51 | 51.104 | 0.09 | Chloroacetic acid, nonyl ester                         |
| 52 | 51.198 | 0.16 | Benzoic acid, ethyl ester                              |
| 53 | 51.608 | 0.26 | Cyclooctasiloxane, hexadecamethyl-                     |
| 54 | 51.816 | 0.14 | Butanedioic acid, diethyl ester                        |
| 55 | 52.948 | 0.15 | Valerena-4,7(11)-diene                                 |
| 56 | 57.184 | 1.25 | Methyl salicylate                                      |
| 57 | 57.751 | 0.52 | 1-methoxycarbonyl-2-trideuteromethylaminoethene        |
| 58 | 58.014 | 0.52 | Trisulfide, di-2-propenyl                              |
| 59 | 59.710 | 0.08 | Silanediol, dimethyl-                                  |
| 60 | 61.141 | 0.31 | Dodecanoic acid, ethyl ester                           |
| 61 | 61.625 | 0.21 | Phenol, 2-methoxy-                                     |
| 62 | 62.605 | 0.16 | Benzenemethanol                                        |
| 63 | 64.445 | 1.85 | Benzeneethanol                                         |
| 64 | 64.806 | 0.18 | 1H-Benzimidazole, 2-methyl-                            |
| 65 | 65.965 | 0.16 | 3-Buten-2-one, 4-(2,6,6-trimethyl- 1-cyclohexen-1-yl)- |
| 66 | 70.972 | 0.11 | 1,6,10-Dodecatrien-3-ol, 3,7,11-trimethyl-, (E)-       |
| 67 | 71.490 | 1.03 | Tetradecanoic acid, ethyl ester                        |
| 68 | 74.051 | 0.41 | Ethyl 13-methyl-tetradecanoate                         |

|             |        |       |                                                           |
|-------------|--------|-------|-----------------------------------------------------------|
| 69          | 76.352 | 0.16  | D-Gluconic acid, 2,3,4,6-tetra-O-methyl-, .delta.-lactone |
| 70          | 76.701 | 0.25  | Phenol, 2-methoxy-4-(2-propenyl)-                         |
| 71          | 77.950 | 0.35  | 2-Methoxy-4-vinylphenol                                   |
| 72          | 80.995 | 13.58 | Hexadecanoic acid, ethyl ester                            |
| 73          | 82.128 | 0.62  | Ethyl-9-hexadecenoate                                     |
| 74          | 84.595 | 0.29  | Dihydroactinidiolide                                      |
| 75          | 89.731 | 0.30  | Octadecanoic acid, 17-methyl-, methyl ester               |
| 76          | 90.524 | 2.37  | (E)-9-Octadecenoic acid ethyl ester                       |
| 77          | 90.862 | 0.40  | 1,4,7,10,13,16-Hexaoxacyclooctacane                       |
| 78          | 92.436 | 13.25 | Linoleic acid ethyl ester                                 |
| 79          | 94.476 | 2.92  | Ethyl 9,12,15-octadecatrienoate                           |
| <b>Go-2</b> |        |       |                                                           |
| 1           | 6.463  | 0.16  | Acetic acid, methyl ester                                 |
| 2           | 7.679  | 0.78  | Acetic acid ethyl ester                                   |
| 3           | 7.956  | 0.72  | Formic acid, propyl ester                                 |
| 4           | 8.368  | 0.08  | Allyl ethyl ether                                         |
| 5           | 8.490  | 0.17  | Butanal, 3-methyl-                                        |
| 6           | 9.112  | 11.46 | Ethanol                                                   |
| 7           | 15.270 | 0.09  | Hexanal                                                   |
| 8           | 15.996 | 0.09  | 1,2,15-Pentadecanetriol                                   |
| 9           | 19.920 | 0.31  | Cyclopentasiloxane, decamethyl-                           |
| 10          | 21.486 | 0.06  | Hexanoic acid methyl ester                                |
| 11          | 22.815 | 0.10  | 1-Butanol, 2-methyl-                                      |
| 12          | 22.896 | 0.26  | 1-Butanol 3-methyl-                                       |

|    |        |      |                                                                           |
|----|--------|------|---------------------------------------------------------------------------|
| 13 | 24.257 | 0.12 | Furan, 2-pentyl-                                                          |
| 14 | 24.495 | 0.27 | Ethyl hexanoate                                                           |
| 15 | 27.562 | 0.10 | 2-Butanone, 3-hydroxy-                                                    |
| 16 | 27.960 | 0.06 | Octanal                                                                   |
| 17 | 30.157 | 0.20 | Pyrazine, 2,6-dimethyl-                                                   |
| 18 | 31.127 | 1.46 | Cyclohexasiloxane, dodecamethyl-                                          |
| 19 | 32.294 | 0.11 | 4-Pentenal                                                                |
| 20 | 32.476 | 0.13 | Eicosane, 10-methyl-                                                      |
| 21 | 34.548 | 0.12 | Octanoic acid, methyl ester                                               |
| 22 | 34.728 | 0.07 | Nonanal                                                                   |
| 23 | 35.273 | 0.11 | Heneicosane                                                               |
| 24 | 35.505 | 0.34 | Pyrazine, trimethyl-                                                      |
| 25 | 36.941 | 0.11 | 7-Oxa-bicyclo [4.1.0]heptane                                              |
| 26 | 37.460 | 0.58 | Octanoic acid, ethyl ester                                                |
| 27 | 37.981 | 0.06 | 2-Furanmethanol, 5-ethenyltetrahydro-.alpha.,.alpha.,5-trimethyl-, trans- |
| 28 | 38.343 | 0.05 | Propanal, 3-(methylthio)-                                                 |
| 29 | 38.440 | 0.17 | 1-Octen-3-ol                                                              |
| 30 | 38.837 | 4.60 | 2-Furan-carboxaldehyde                                                    |
| 31 | 39.150 | 0.03 | 1H-Imidazole 1,5-dimethyl-                                                |
| 32 | 39.693 | 0.09 | 1-Undecene, 7-methyl-                                                     |
| 33 | 40.018 | 2.74 | Pyrazine, tetramethyl-                                                    |
| 34 | 40.485 | 0.16 | Acetic acid                                                               |
| 35 | 40.897 | 0.07 | 1-(Ethylsulfanyl)Ethylene                                                 |
| 36 | 41.469 | 0.48 | Ethanone, 1- (2-furanyl)-                                                 |

|    |        |      |                                                                                              |
|----|--------|------|----------------------------------------------------------------------------------------------|
| 37 | 41.796 | 2.00 | Cycloheptasiloxane, tetradecamethyl-                                                         |
| 38 | 42.551 | 1.45 | Benzaldehyde                                                                                 |
| 39 | 43.537 | 0.07 | Decan-1-ol                                                                                   |
| 40 | 43.759 | 0.08 | Nonanoic acid, ethyl ester                                                                   |
| 41 | 43.891 | 0.11 | 2,3-Butanediol                                                                               |
| 42 | 44.387 | 1.18 | L-Linalool                                                                                   |
| 43 | 45.580 | 0.56 | 2-Furancarboxaldehyde, 5-methyl-                                                             |
| 44 | 46.099 | 0.14 | 2,3-Butanediol                                                                               |
| 45 | 46.157 | 0.19 | 3-Methyl-3-butenyl ether                                                                     |
| 46 | 46.906 | 0.24 | 6-Methyl-3,5-heptadiene-2-one                                                                |
| 47 | 47.562 | 0.14 | Cyclohexanol, 2,6-dimethyl-                                                                  |
| 48 | 48.069 | 0.46 | 5-Hepten-1-ol, 2,6-dimethyl-                                                                 |
| 49 | 48.284 | 0.09 | 3-Cyclohexene-1-acetaldehyde, .alpha.,4-dimethyl-                                            |
| 50 | 48.560 | 0.52 | Benzoic acid, methyl ester                                                                   |
| 51 | 49.655 | 1.22 | Benzeneacetaldehyde                                                                          |
| 52 | 50.044 | 0.79 | 1,3-Cyclohexadiene-1-carboxaldehyde, 2,6,6-trimethyl-                                        |
| 53 | 50.294 | 0.48 | Silanediol, dimethyl-                                                                        |
| 54 | 50.813 | 1.46 | 2- Furanmethanol                                                                             |
| 55 | 51.207 | 0.35 | 2-Furancarboxamide, N-methyl-                                                                |
| 56 | 51.600 | 0.84 | Cyclooctasiloxane, hexadecamethyl-                                                           |
| 57 | 51.845 | 0.12 | Trimethylsilyl Ester of Furan-3-Carboxylic Acid                                              |
| 58 | 52.634 | 0.07 | 2,6,6-Trimethyl-2-cyclohexene-1,4-dione                                                      |
| 59 | 52.950 | 0.05 | [4aR,8aR] - 1,2,3,4,4a,5,8,8a - octahydro - 1,1,4a,6 - tetramethyl -5- methylene-naphthalene |
| 60 | 53.140 | 0.38 | 3-Cyclohexene-1-methanol, .alpha., alpha., 4-trimethyl-                                      |

|    |        |      |                                                                 |
|----|--------|------|-----------------------------------------------------------------|
| 61 | 56.367 | 0.15 | Benzeneacetic acid, methyl ester                                |
| 62 | 57.186 | 1.18 | Methyl salicylate                                               |
| 63 | 57.823 | 0.14 | Benzeneacetic acid, ethyl ester                                 |
| 64 | 58.920 | 0.25 | Dodecanoic acid, methyl ester                                   |
| 65 | 59.435 | 0.18 | Acetamide, N-(2-phenylethyl)-                                   |
| 66 | 59.728 | 0.08 | Silanediol, dimethyl-                                           |
| 67 | 60.357 | 0.10 | 1,1,1,5,7,7,7-Heptamethyl-3,3-bis(trimethylsiloxy)tetrasiloxane |
| 68 | 61.140 | 0.84 | Dodecanoic acid, ethyl ester                                    |
| 69 | 61.629 | 0.28 | Phenol, 2-methoxy-                                              |
| 70 | 62.602 | 0.21 | Benzyl alcohol                                                  |
| 70 | 64.440 | 2.26 | Benzeneethanol                                                  |
| 71 | 65.325 | 0.12 | Benzeneacetaldehyde, alpha.- ethylidene-                        |
| 72 | 65.968 | 0.20 | Trans-.beta.-Ionone                                             |
| 73 | 67.369 | 0.41 | Ethanone, 1-(1H-pyrrol-2-yl)                                    |
| 74 | 69.007 | 0.20 | Phenol                                                          |
| 75 | 69.553 | 0.56 | Myristic acid, methyl ester                                     |
| 76 | 70.249 | 0.37 | Guaiacol, 4-ethyl-                                              |
| 77 | 71.490 | 1.55 | Tetradecanoic acid, ethyl ester                                 |
| 78 | 74.056 | 0.20 | Ethyl 13-methyl-tetradecanoate                                  |
| 79 | 77.075 | 0.16 | Phenol, 2-ethyl-                                                |
| 80 | 77.953 | 0.78 | 2-Methoxy-4-vinylphenol                                         |
| 81 | 79.292 | 3.36 | Hexadecanoic acid, methyl ester                                 |
| 82 | 80.476 | 0.24 | 9-Hexadecanoic acid, methyl ester, (Z)-                         |
| 83 | 80.989 | 7.26 | Hexadecanoic acid, ethyl ester                                  |

|             |        |       |                                                                  |
|-------------|--------|-------|------------------------------------------------------------------|
| 84          | 82.125 | 0.64  | Ethyl 9-hexadecenoate                                            |
| 85          | 84.595 | 0.42  | 2(4H)-Benzofuranone, 5,6,7,7a-tetrahydro-4,4,7a-trimethyl-, (R)- |
| 86          | 86.493 | 0.25  | 4-Vinylphenol                                                    |
| 87          | 89.092 | 1.97  | 9-Octadecenoic acid (Z)-, methyl ester                           |
| 88          | 89.737 | 0.21  | Octadecanoic acid, ethyl ester                                   |
| 89          | 90.531 | 5.01  | Ethyl (9Z)-9-Octadecenoate                                       |
| 90          | 90.871 | 2.29  | 1,4,7,10,13,16-Hexaoxacyclooctadecane                            |
| 91          | 91.056 | 7.79  | 9,12-Octadecadienoic acid, methylester, (E,E)-                   |
| 92          | 92.441 | 17.58 | Linoleic acid ethyl ester                                        |
| 93          | 93.505 | 0.84  | 9,12,15-Octadecatrienoic acid, methyl ester, (Z,Z,Z)-            |
| 94          | 94.478 | 2.45  | Ethyl 9,12,15-octadecatrienoate                                  |
| <b>Go-3</b> |        |       |                                                                  |
| 1           | 6.462  | 0.17  | Acetic acid, methyl ester                                        |
| 2           | 7.679  | 0.33  | Acetic acid ethyl ester                                          |
| 3           | 7.957  | 1.53  | Formic acid, propyl ester                                        |
| 4           | 8.489  | 0.22  | Butanal, 3-methyl-                                               |
| 5           | 9.108  | 13.41 | Ethanol                                                          |
| 6           | 15.241 | 0.23  | 4-Isopropylamino-2-methylbutan-2-ol                              |
| 7           | 16.109 | 0.09  | 2,2'-Oxybis (acethydrazide)                                      |
| 8           | 19.742 | 0.11  | Methyl-2,3,4-tri-O-methyl-β-D-arabopyranoside- 5,5-d2            |
| 9           | 19.915 | 1.02  | Cyclopentasiloxane, decamethyl-                                  |
| 10          | 22.834 | 0.15  | 1-Butanol, 2-methyl-                                             |
| 11          | 22.913 | 0.36  | 1-Butanol, 3-methyl-                                             |
| 12          | 22.248 | 0.18  | Furan, 2-pentyl-                                                 |



|    |        |      |                                                                          |
|----|--------|------|--------------------------------------------------------------------------|
| 13 | 24.499 | 0.09 | 1-Propene, 3-(methylthio)-                                               |
| 14 | 27.328 | 0.18 | (Z)-1-Methyl-2-(prop-1-en-1-yl)disulfane                                 |
| 15 | 27.571 | 0.24 | Acetoin                                                                  |
| 16 | 27.958 | 0.18 | Octanal                                                                  |
| 17 | 28.667 | 0.06 | Cyclohexane, 1,4-dimethyl-                                               |
| 18 | 30.155 | 2.39 | Pyrazine, 2,5-dimethyl-                                                  |
| 19 | 30.560 | 0.20 | Pyrazine., 2,6-dimethyl-                                                 |
| 20 | 31.125 | 3.28 | Cyclohexasiloxane, dodecamethyl-                                         |
| 21 | 32.297 | 0.17 | 1-Hexanol                                                                |
| 22 | 32.475 | 0.57 | Tridecane, 2-methyl-                                                     |
| 23 | 33.709 | 0.41 | Dimethyl trisulfide                                                      |
| 24 | 34.727 | 0.23 | Nonanal                                                                  |
| 25 | 35.271 | 0.19 | Tetradecane                                                              |
| 26 | 35.506 | 1.87 | Pyrazine, trimethyl-                                                     |
| 27 | 36.938 | 0.21 | Octenal                                                                  |
| 28 | 37.979 | 0.11 | 2-Furanmethanol, 5-ethenyltetrahydro-.alpha., .alpha.,5-trimethyl-, cis- |
| 29 | 38.106 | 0.21 | Pyrazine, 2-ethyl-3,5-dimethyl-                                          |
| 30 | 38.442 | 0.32 | 1-Octen-3-ol                                                             |
| 31 | 38.830 | 3.40 | 2-furan-carboxaldehyde                                                   |
| 32 | 39.164 | 0.18 | Pyrazine, 2-ethyl-3,5-dimethyl-                                          |
| 33 | 39.688 | 2.02 | Acetic acid                                                              |
| 34 | 40.017 | 3.75 | Pyrazine, tetramethyl-                                                   |
| 35 | 40.853 | 0.11 | l-Carbomethoxy-4-formylcyclohexane                                       |
| 36 | 41.354 | 0.10 | l-Methoxy-3-(2-hydroxyethyl)nonane                                       |

|    |        |      |                                                                       |
|----|--------|------|-----------------------------------------------------------------------|
| 37 | 41.468 | 0.70 | (3E,5E)-Hepta-3,5-dien-2-one                                          |
| 38 | 41.796 | 3.18 | Cycloheptasiloxane, tetradecamethyl-                                  |
| 39 | 42.442 | 0.16 | 2,3,5-Trimethyl-6-ethylpyrazine 4-hydroxy-1,3-benzenedicarboxaldehyde |
| 40 | 42.551 | 2.00 | Benzaldehyde                                                          |
| 41 | 42.712 | 0.15 | 1,3-Dithiolane                                                        |
| 42 | 43.555 | 0.31 | Cis-4-Nonene                                                          |
| 43 | 43.891 | 0.45 | 2,3-Butanediol                                                        |
| 44 | 44.385 | 0.48 | Cyclohexene, 1-methyl-4-(1-methylethylidene)-                         |
| 45 | 44.935 | 0.24 | Eicosane, 7-hexyl-                                                    |
| 46 | 45.578 | 0.33 | 2-Furancarboxaldehyde, 5-methyl-                                      |
| 47 | 46.148 | 0.78 | 2-Octanol, (R)-                                                       |
| 48 | 46.761 | 0.09 | Butanoic acid, 4,4'-dithiobis-                                        |
| 49 | 46.907 | 0.33 | Ethanone, 1-(2-methyl-1-cyclopenten-1-yl)-                            |
| 50 | 47.244 | 1.34 | Propanoic acid, 2-methyl-                                             |
| 51 | 47.563 | 0.59 | Hexadecane                                                            |
| 52 | 47.697 | 0.14 | Hydrazine, 1,1-diethyl-                                               |
| 53 | 49.661 | 1.47 | Benzeneacetaldehyde                                                   |
| 54 | 50.031 | 0.81 | Prop-2-enyl (2S)-2-methyl-3-phenylpropionate                          |
| 55 | 50.305 | 0.86 | Silanediol, dimethyl-                                                 |
| 56 | 50.812 | 1.83 | 2-Furanmethanol                                                       |
| 57 | 51.202 | 0.7  | 2-ethyl-5-propylthiophene                                             |
| 58 | 51.603 | 1.14 | Cyclooctasiloxane, hexadecamethyl-                                    |
| 59 | 52.316 | 6.93 | Pentanoic acid                                                        |
| 60 | 52.529 | 6.99 | Butanoic acid, 3-methyl-                                              |

|             |        |      |                                                                   |
|-------------|--------|------|-------------------------------------------------------------------|
| 61          | 53.137 | 0.50 | DL-Serine                                                         |
| 62          | 56.372 | 0.46 | Benzeneacetic acid, methyl ester                                  |
| 63          | 57.184 | 1.93 | Methyl salicylate                                                 |
| 64          | 57.826 | 0.22 | Ethyl 2-phenylacetate                                             |
| 65          | 59.702 | 0.15 | Silanediol, dimethyl-                                             |
| 66          | 61.627 | 0.37 | Phenol, 2-methoxy-                                                |
| 67          | 62.600 | 1.49 | Benzenemethanol                                                   |
| 68          | 64.443 | 1.15 | Benzeneethanol                                                    |
| 69          | 65.965 | 0.23 | (3E)-4-(2,6,6-Trimethyl-1-Cyclohexen-1-yl)-3-Buten-2-one          |
| 70          | 67.360 | 0.41 | Ethanone, 1-(1H-pyrrol-2-yl)-                                     |
| 71          | 67.937 | 0.18 | 4H-Pyran-4-one, 3-hydroxy-2-methyl                                |
| 72          | 69.553 | 0.30 | Myristic acid, methyl ester                                       |
| 73          | 70.966 | 0.26 | (6E)-3-Hydroxy-3,7,11-trimethyl-6,10-dodecadienyl acetate         |
| 74          | 71.488 | 0.49 | Tetradecanoic acid, ethyl ester                                   |
| 75          | 77.949 | 6.36 | 2-Methoxy-4-vinylphenol                                           |
| 76          | 79.288 | 1.45 | Hexadecanoic acid, methyl ester                                   |
| 77          | 80.984 | 2.00 | Hexadecanoic acid, ethyl ester                                    |
| 78          | 84.591 | 0.35 | 2(4H)-Benzofuranone, 5,6,7,7a-tetrahydro-4,4,7a-trimethyl -, (R)- |
| 79          | 86.497 | 1.53 | 4-Vinylphenol                                                     |
| 80          | 91.049 | 2.09 | 9,12-Octadecadienoic acid (Z,Z)-,methyl ester                     |
| 81          | 92.426 | 3.13 | Linoleic acid ethyl ester                                         |
| 82          | 94.209 | 4.8  | 1,4,7,10,13,16-Hexaoxacyclooctadecane                             |
| <b>Go-4</b> |        |      |                                                                   |
| 1           | 7.673  | 0.24 | Acetic acid ethyl ester                                           |

|    |        |       |                                                                     |
|----|--------|-------|---------------------------------------------------------------------|
| 2  | 7.949  | 0.31  | Acetic acid hydroxy-                                                |
| 3  | 8.482  | 0.13  | Butanal, 3-methyl-                                                  |
| 4  | 9.103  | 10.73 | Ethanol                                                             |
| 5  | 15.910 | 0.13  | 1-Propanol, 2-methyl-                                               |
| 6  | 19.927 | 0.57  | Cyclopentasiloxane, decamethyl-                                     |
| 7  | 22.804 | 0.16  | 1-Butanol, 2-methyl-                                                |
| 8  | 22.884 | 0.72  | 1-Butanol, 3-methyl-                                                |
| 9  | 24.267 | 0.06  | Furan, 2-pentyl-                                                    |
| 10 | 24.496 | 0.12  | Hexanoic acid, ethyl ester                                          |
| 11 | 27.553 | 0.08  | 2-Butanone, 3-hydroxy-                                              |
| 12 | 27.964 | 0.09  | Octanal                                                             |
| 13 | 30.148 | 0.78  | Pyrazine, 2,5-dimethyl-                                             |
| 14 | 31.125 | 1.67  | Cyclohexasiloxane, dodecamethyl-                                    |
| 15 | 31.399 | 0.06  | 2-Butanol, 3-methyl-                                                |
| 16 | 32.286 | 0.06  | 1-Hexanol                                                           |
| 17 | 32.478 | 0.15  | Heneicosane                                                         |
| 18 | 35.275 | 0.08  | Undecane, 2,7-dimethyl-                                             |
| 19 | 35.500 | 0.65  | Pyrazine, trimethyl-                                                |
| 20 | 36.939 | 0.06  | 2-Hydroxy-1-oxacyclooctane                                          |
| 21 | 37.460 | 0.11  | Octanoic acid, ethyl ester                                          |
| 22 | 37.980 | 0.11  | Ethyl 2-(5-methyl-5-vinyltetrahydrofuran-2-yl)propan-2-yl carbonate |
| 23 | 38.105 | 0.06  | Pyrazine, 3-ethyl-2,5-dimethyl-                                     |
| 24 | 38.443 | 0.09  | 1-Octen-3-ol                                                        |
| 25 | 38.834 | 4.79  | 2-furan-carboxaldehyde                                              |

|    |        |      |                                                           |
|----|--------|------|-----------------------------------------------------------|
| 26 | 39.150 | 0.14 | Pyrazine, 2-ethyl-3,5-dimethyl-                           |
| 27 | 39.691 | 0.13 | 3-Undecene, 10-methyl-                                    |
| 28 | 40.015 | 2.49 | 2,3,5,6 Tetramethyl Pyrazine                              |
| 29 | 41.467 | 0.69 | Ethanone, 1-(2-furanyl)-                                  |
| 30 | 41.800 | 1.26 | Tetradecamethylcycloheptasiloxane                         |
| 31 | 42.438 | 0.22 | 2,3,5-Trimethyl-6-ethylpyrazine                           |
| 32 | 42.548 | 0.4  | Benzaldehyde                                              |
| 33 | 43.753 | 0.04 | Nonanoic acid, ethyl ester                                |
| 34 | 44.384 | 0.50 | L-Linalool                                                |
| 35 | 44.933 | 0.07 | Octadecane                                                |
| 36 | 45.577 | 0.63 | 2-Furancarboxaldehyde, 5-methyl-                          |
| 37 | 45.808 | 0.05 | 1H-Pyrazole-4-carboxylic acid                             |
| 38 | 46.156 | 0.24 | Oxirane, 2-methyl-3-propyl-, cis-                         |
| 39 | 46.902 | 0.28 | 6-Methyl-3,5-heptadiene-2-one                             |
| 40 | 47.040 | 0.09 | .Alpha.-D-Glucopyranoside, methyl 2,3,4,6-tetra-O-methyl- |
| 41 | 47.554 | 0.14 | Hexadecane                                                |
| 42 | 48.072 | 0.41 | 2-Allyl-2-methyl-1,3-cyclopentanedione                    |
| 43 | 48.276 | 0.1  | Decane-3,4-d2                                             |
| 44 | 48.472 | 0.07 | 3-Cyclohexene-1-acetaldehyde, .alpha.,4-dimethyl-         |
| 45 | 48.558 | 0.06 | Benzoic acid, hydrazide                                   |
| 46 | 48.646 | 0.16 | 1H-Inden-1-ol, 3a,4,5,6,7,7a-hexahydro-1-methyl-          |
| 47 | 49.645 | 0.83 | Benzeneacetaldehyde                                       |
| 48 | 50.041 | 0.52 | 1,3-Cyclohexadiene-1-carboxaldehyde, 2,6,6-trimethyl-     |
| 49 | 50.812 | 2.33 | 2-Furanmethanol                                           |

|    |        |      |                                                                        |
|----|--------|------|------------------------------------------------------------------------|
| 50 | 51.204 | 0.11 | 3H-Pyrrol-3-one, 1-ethyl-1,2-dihydro-2-methyl-                         |
| 51 | 51.606 | 0.41 | Cyclooctasiloxane, hexadecamethyl-                                     |
| 52 | 51.814 | 0.10 | Butanedioic acid, diethyl ester                                        |
| 53 | 52.619 | 0.07 | 2-Cyclohexene-1,4-dione, 2,6,6-trimethyl-                              |
| 54 | 52.951 | 0.05 | Cis-(-)-2,4a,5,6,9a-Hexahydro-3,5,5,9-tetramethyl(1H)benzocycloheptene |
| 55 | 53.150 | 0.19 | 3-Cyclohexene-1-methanol, .alpha., .alpha.,4-trimethyl-                |
| 56 | 56.368 | 0.16 | Benzeneacetic acid, methyl ester                                       |
| 57 | 57.185 | 0.23 | Benzoic acid, 2-hydroxy-, methyl ester                                 |
| 58 | 57.829 | 0.21 | Ethyl 2-phenylacetate                                                  |
| 59 | 58.921 | 0.12 | Dodecanoic acid, methyl ester                                          |
| 60 | 59.428 | 0.10 | Acetic acid, 2-phenylethyl ester                                       |
| 61 | 59.751 | 0.04 | Silanediol, dimethyl-                                                  |
| 62 | 60.355 | 0.04 | Cyclononasiloxane, octadecamethyl-                                     |
| 63 | 61.141 | 0.52 | Dodecanoic acid, ethyl ester                                           |
| 64 | 61.631 | 0.46 | Phenol, 2-methoxy-                                                     |
| 65 | 62.604 | 0.51 | Benzyl alcohol                                                         |
| 66 | 64.442 | 1.64 | Benzeneethanol                                                         |
| 67 | 65.322 | 0.19 | Benzeneacetaldehyde, .alpha.-ethylidene-                               |
| 68 | 65.971 | 0.17 | 3-Buten-2-one, 4-(2,6,6-trimethyl-1-cyclohexen-1-yl)-                  |
| 69 | 67.366 | 0.77 | Ethanone, 1-(1H-pyrrol-2-yl)-                                          |
| 70 | 69.000 | 0.38 | Phenol                                                                 |
| 71 | 69.556 | 0.38 | Myristic acid, methyl ester                                            |
| 72 | 69.937 | 0.16 | 1H-Pyrrole-2-carboxaldehyde                                            |
| 73 | 70.243 | 0.24 | 3,5-Diacetyl-1H-pyrazole                                               |

|    |        |       |                                                      |
|----|--------|-------|------------------------------------------------------|
| 74 | 70.968 | 0.09  | 1,6,10-Dodecatrien-3-ol, 3,7,11-trimethyl-           |
| 75 | 71.489 | 1.35  | Tetradecanoic acid, ethyl ester                      |
| 76 | 72.189 | 0.16  | Pentadecanoic acid, methyl ester                     |
| 77 | 72.454 | 0.07  | (2E)-5-Methyl-2-phenyl-2-hexenal                     |
| 78 | 72.905 | 0.10  | Tetradecanoic acid, 12-methyl-, methyl ester         |
| 79 | 73.662 | 0.12  | 1H-Pyrrole-2-carboxaldehyde, 1-methyl-               |
| 80 | 74.047 | 0.38  | Pentadecanoic acid, ethyl ester                      |
| 81 | 74.767 | 0.23  | Ethyl 13-methyl-tetradecanoate                       |
| 82 | 76.350 | 0.11  | Pentadecanoic acid, ethyl ester                      |
| 83 | 77.950 | 1.96  | 2-Methoxy-4-vinylphenol                              |
| 84 | 79.294 | 4.28  | Hexadecanoic acid, methyl ester                      |
| 85 | 80.476 | 0.14  | 9-Hexadecenoic acid, methyl ester, (Z)-              |
| 86 | 80.991 | 11.47 | Hexadecanoic acid, ethyl ester                       |
| 87 | 81.280 | 0.29  | 4H-Pyran-4-one, 2,3-dihydro-3,5-di hydroxy-6-methyl- |
| 88 | 82.129 | 0.53  | Ethyl 9-hexadecenoate                                |
| 89 | 84.599 | 0.42  | Dihydroactinidiolide                                 |
| 90 | 86.495 | 0.26  | 4-Vinylphenol                                        |
| 91 | 88.250 | 0.16  | Heptadecanoic acid, 16-methyl-, methyl ester         |
| 92 | 89.094 | 1.93  | 9-Octadecenoic acid, methyl ester, (E)-              |
| 93 | 89.738 | 0.36  | Octadecanoic acid, ethyl ester                       |
| 94 | 90.534 | 4.85  | Ethyl (9Z)-9-Octadecenoate                           |
| 95 | 90.916 | 1.98  | 5-Hydroxymethylfurfural                              |
| 96 | 91.054 | 5.95  | 9,12-Octadecadienoic acid (Z,Z)-,methyl ester        |
| 97 | 92.438 | 13.78 | Linoleic acid ethyl ester                            |

|             |        |       |                                                       |
|-------------|--------|-------|-------------------------------------------------------|
| 98          | 93.506 | 1.04  | 9,12,15-Octadecatrienoic acid, methyl ester, (Z,Z,Z)- |
| 99          | 94.202 | 4.05  | 1,4,7,10,13,16-Hexaoxacyclooctadecane                 |
| 100         | 94.473 | 2.52  | Ethyl 9,12,15-octadecatrienoate                       |
| 101         | 95.308 | 0.29  | 21-Krone-7                                            |
| <b>Go-5</b> |        |       |                                                       |
| 1           | 7.675  | 0.59  | Acetic acid ethyl ester                               |
| 2           | 7.956  | 0.10  | Formic acid. ethyl ester                              |
| 3           | 9.113  | 17.60 | Ethanol                                               |
| 4           | 15.321 | 0.05  | DL-Cystathionine                                      |
| 5           | 15.907 | 0.31  | 1-Propanol, 2-methyl-                                 |
| 6           | 16.560 | 0.04  | Ethanol, 2-bromo-                                     |
| 7           | 19.004 | 0.26  | Diallyl sulfide                                       |
| 8           | 19.929 | 0.36  | Cyclopentasiloxane, decamethyl-                       |
| 9           | 22.804 | 0.23  | 1-Butanol, 2-methyl-                                  |
| 10          | 22.882 | 0.43  | 1-Butanol, 3-methyl-                                  |
| 11          | 24.498 | 0.09  | Ethyl hexanoate                                       |
| 12          | 27.337 | 1.18  | Disulfide, methyl 2-propenyl                          |
| 13          | 27.544 | 0.26  | 2-Butanone, 3-hydroxy-                                |
| 14          | 27.859 | 0.47  | (Z)-1-Methyl-2-(prop-1-en-1-yl)disulfane              |
| 15          | 29.081 | 0.05  | Pentanoic acid., 2-(methoxymethyl)-4-oxo-             |
| 16          | 30.145 | 0.16  | Dimethyl pyrazine                                     |
| 17          | 31.126 | 1.86  | Cyclohexasiloxane, dodecamethyl-                      |
| 18          | 32.286 | 0.13  | 1-Hexanol                                             |
| 19          | 33.712 | 1.67  | Dimethyl trisulfide                                   |



|    |        |      |                                                       |
|----|--------|------|-------------------------------------------------------|
| 20 | 35.271 | 0.06 | Methoxyacetic acid, 2-tridecyl ester                  |
| 21 | 35.499 | 0.36 | Pyrazine, trimethyl-                                  |
| 22 | 36.943 | 0.09 | (E)-1-(Prop-1-en-1-yl)-2-propyldisulfane              |
| 23 | 37.462 | 0.13 | Octanoic acid, ethyl ester                            |
| 24 | 38.442 | 0.07 | 1-Octen-3-ol                                          |
| 25 | 38.833 | 0.48 | 2-furan-carboxaldehyde                                |
| 26 | 40.023 | 8.75 | 2,3,5,6 Tetramethyl pyrazine                          |
| 27 | 40.116 | 6.18 | Diallyl disulfide                                     |
| 28 | 40.485 | 2.51 | (E)-1-Allyl-2-(prop-1-en-1-yl)disulfane               |
| 29 | 41.466 | 0.14 | Bicyclo[4.1.0]heptane, 1-methyl-                      |
| 30 | 41.796 | 1.88 | Tetradecamethylcycloheptasiloxane                     |
| 31 | 42.436 | 0.36 | 4-Ethyl-2,5,6-Trimethylpyrimidine                     |
| 32 | 42.550 | 0.46 | Benzaldehyde                                          |
| 33 | 42.688 | 6.51 | 3H-1,2-Dithiole                                       |
| 34 | 43.760 | 0.06 | Nonanoic acid, ethyl ester                            |
| 35 | 44.377 | 0.09 | L-Linalool                                            |
| 36 | 45.584 | 0.10 | 5 Methyl furfural                                     |
| 37 | 46.146 | 0.15 | 2-Butanol, 3-methyl-                                  |
| 38 | 46.769 | 6.98 | Trisulfide, methyl 2-propenyl                         |
| 39 | 47.033 | 0.07 | 1-Propene, 1-(methylthio)-, (E)-                      |
| 40 | 48.070 | 0.09 | Neopentylidenecyclohexane                             |
| 41 | 49.649 | 0.19 | Benzeneacetaldehyde                                   |
| 42 | 49.812 | 0.10 | Propanoic acid, 2-(phenylmethoxy)-, methyl ester      |
| 43 | 50.043 | 0.19 | 1,3-Cyclohexadiene-1-carboxaldehyde, 2,6,6-trimethyl- |

|    |        |       |                                                         |
|----|--------|-------|---------------------------------------------------------|
| 44 | 50.808 | 0.18  | 2- Furanmethanol                                        |
| 45 | 51.202 | 0.06  | 5-Hepten-2-ol, 6-methyl-                                |
| 46 | 51.603 | 0.65  | Cyclooctasiloxane, hexadecamethyl-                      |
| 47 | 52.084 | 0.05  | 2, 6 -Octadienal, 3,7-dimethyl-, (Z)                    |
| 48 | 53.139 | 0.06  | 3-Cyclohexene-1-methanol, .alpha., .alpha.,4-trimethyl- |
| 49 | 55.069 | 4.22  | 3-Vinyl-1,2-dithiacyclohex-4-ene                        |
| 50 | 57.182 | 0.68  | Methyl salicylate                                       |
| 51 | 57.824 | 0.15  | Acetic acid, phenyl-, ethyl ester                       |
| 52 | 58.023 | 11.93 | Trisulfide, di-2-propenyl                               |
| 53 | 59.171 | 0.09  | 2,4-Decadienal, (E,E)-                                  |
| 54 | 59.693 | 0.10  | Silanediol, dimethyl-                                   |
| 55 | 60.358 | 0.10  | Cyclononasiloxane, octadecamethyl-                      |
| 56 | 60.846 | 1.72  | 3-Vinyl-1,2-dithiacyclohex-5-ene                        |
| 57 | 61.138 | 0.23  | Dodecanoic acid, ethyl ester                            |
| 58 | 61.622 | 0.21  | Phenol, 2-methoxy-                                      |
| 59 | 64.436 | 1.20  | Benzeneethanol                                          |
| 60 | 65.965 | 0.12  | 3-Buten-2-one, 4-(2,6,6-trimethyl-1-cyclohexen-1-yl)-   |
| 61 | 67.363 | 0.16  | Ethanone, 1-(1H-pyrrol-2-yl)-                           |
| 62 | 68.150 | 0.09  | 7-Amino-4-methyl-2-quinolinol                           |
| 63 | 71.487 | 0.82  | Tetradecanoic acid, ethyl ester                         |
| 64 | 74.048 | 0.12  | Pentadecanoic acid, ethyl ester                         |
| 65 | 74.491 | 0.12  | Acetyl butyl disulfide                                  |
| 66 | 76.354 | 0.08  | 15-Crown-5                                              |
| 70 | 76.699 | 0.05  | 1,4,7,10,13,16-Hexaoxacyclooctadecane                   |

|             |        |       |                                                                  |
|-------------|--------|-------|------------------------------------------------------------------|
| 67          | 77.950 | 2.28  | 2-Methoxy-4-vinylphenol                                          |
| 68          | 79.295 | 0.15  | Hexadecanoic acid, methyl ester                                  |
| 69          | 80.983 | 5.85  | Hexadecanoic acid, ethyl ester                                   |
| 70          | 82.125 | 0.21  | Ethyl 9-hexadecenoate                                            |
| 71          | 84.591 | 0.23  | 2(4H)-Benzofuranone, 5,6,7,7a-tetrahydro-4,4,7a-trimethyl-, (R)- |
| 72          | 86.495 | 0.67  | Benzofuran, 2,3-dihydro-                                         |
| 73          | 90.526 | 0.66  | 9-Octadecenoic acid (Z)-, ethyl ester                            |
| 74          | 92.426 | 3.13  | Linoleic acid ethyl ester                                        |
| 75          | 94.475 | 1.79  | 1,4,7,10,13,16-Hexaoxacyclooctadecane                            |
| <b>Go-6</b> |        |       |                                                                  |
| 1           | 7.677  | 0.83  | Acetic acid ethyl ester                                          |
| 2           | 7.953  | 0.20  | Formic acid, ethyl ester                                         |
| 3           | 9.110  | 11.96 | Ethanol                                                          |
| 4           | 15.905 | 0.19  | 1-Propanol, 2-methyl-                                            |
| 5           | 16.994 | 0.04  | 2-Butanol                                                        |
| 6           | 18.999 | 0.22  | 1-Propene, 3,3'-thiobis-                                         |
| 7           | 19.929 | 0.27  | Cyclopentasiloxane, decamethyl-                                  |
| 8           | 22.808 | 0.12  | 1-Butanol 2-methyl-                                              |
| 9           | 22.883 | 0.27  | 1-Butanol 3-methyl-                                              |
| 10          | 24.264 | 0.05  | Furan, 2-pentyl-                                                 |
| 11          | 24.499 | 0.19  | Hexanoic acid, ethyl ester                                       |
| 12          | 26.267 | 0.63  | (Z)-1-Methyl-2-(prop-1-en-1-yl)disulfane                         |
| 13          | 27.338 | 0.57  | Disulfide, methyl 2-propenyl                                     |
| 14          | 27.548 | 0.21  | 2-Butanone, 3-hydroxy-                                           |

|    |        |      |                                          |
|----|--------|------|------------------------------------------|
| 15 | 30.146 | 0.22 | Pyrazine, 2,5-dimethyl-                  |
| 16 | 31.128 | 1.19 | Cyclohexasiloxane, dodecamethyl-         |
| 17 | 32.287 | 0.24 | 1-Hexanol                                |
| 18 | 33.714 | 0.25 | Trisulfide, dimethyl                     |
| 19 | 33.939 | 0.25 | Dimethyl trisulfide                      |
| 20 | 34.740 | 0.05 | Ethane, 1,1-diethoxy-                    |
| 21 | 35.269 | 0.06 | Tetradecane                              |
| 22 | 35.497 | 0.46 | Pyrazine, trimethyl-                     |
| 23 | 36.947 | 0.22 | (Z)-1-(Prop-1-en-1-yl)-2-propyldisulfane |
| 24 | 37.458 | 0.24 | Octanoic acid, ethyl ester               |
| 25 | 38.440 | 0.14 | 1-Octen-3-ol                             |
| 26 | 38.828 | 0.31 | 2-furan-carboxaldehyde                   |
| 27 | 39.175 | 1.06 | (Z)-1-Allyl-2-(prop-1-en-1-yl)disulfane  |
| 28 | 40.018 | 3.76 | 2,3,5,6 Tetramethyl pyrazine             |
| 29 | 40.115 | 4.96 | Diallyl disulphide                       |
| 30 | 40.485 | 2.06 | (E)-1-Allyl-2-(prop-1-en-1-yl)disulfane  |
| 31 | 41.470 | 0.20 | (3E,5E)-Hepta-3,5-dien-2-one             |
| 32 | 41.799 | 1.42 | Tetradecamethylcycloheptasiloxane        |
| 33 | 42.436 | 0.25 | 2,3,5-Trimethyl-6-ethylpyrazine          |
| 34 | 42.549 | 0.18 | Benzaldehyde                             |
| 35 | 42.689 | 5.59 | 3H-1,2-Dithiole                          |
| 36 | 43.546 | 0.06 | 2-Nonenal, (E)-                          |
| 37 | 43.756 | 0.09 | Nonanoic acid, ethyl ester               |
| 38 | 43.875 | 0.18 | Ethanol, 2,2'-oxybis-                    |

|    |        |       |                                                        |
|----|--------|-------|--------------------------------------------------------|
| 39 | 44.380 | 0.14  | 1,6-Octadien-3-ol, 3,7-dimethyl-                       |
| 40 | 45.589 | 0.16  | 3,5-Octadien-2-one                                     |
| 41 | 45.803 | 0.11  | (2S,6S)-Bicyclo[2.2.2]octane-2,6-diol                  |
| 42 | 46.097 | 0.33  | 2,3-Butanediol                                         |
| 43 | 46.765 | 3.98  | Trisulfide, methyl 2-propenyl                          |
| 44 | 46.893 | 0.27  | 6-Methyl-3, 5-heptadiene-2-one                         |
| 45 | 47.563 | 0.08  | Dodecane, 2,6,10-trimethyl-                            |
| 46 | 48.073 | 0.09  | Neopentylidenecyclohexane                              |
| 47 | 48.204 | 0.04  | Cis-anti-cis Dicyclohexyl-18-crown-6                   |
| 48 | 48.629 | 0.00  | 1-Cyclohexene-1-carboxaldehyde, 2,6,6-trimethyl-       |
| 49 | 49.653 | 0.23  | Phenyl acetaldehyde                                    |
| 50 | 49.809 | 0.18  | Decanoic acid, ethyl ester                             |
| 51 | 50.042 | 0.31  | 1,3-Cyclohexadiene-1-carboxaldehyde, 2,6,6-trimethyl-  |
| 52 | 50.335 | 0.17  | (S-Nitroso)thiomethane                                 |
| 53 | 50.810 | 0.45  | 2- Furanmethanol                                       |
| 54 | 51.192 | 0.14  | Benzoic acid, ethyl ester                              |
| 55 | 51.604 | 0.40  | Cyclooctasiloxane, hexadecamethyl-                     |
| 56 | 51.805 | 0.07  | Thiazole, 5-ethoxy-                                    |
| 57 | 53.142 | 0.07  | 3-Cyclohexene-1-methanol, .alpha.,.alpha.,4-trimethyl- |
| 58 | 55.070 | 3.18  | 3-Vinyl-1,2-dithiacyclohex-4-ene                       |
| 59 | 57.178 | 0.86  | Benzoic acid, 2-hydroxy-, methyl ester                 |
| 60 | 57.825 | 0.24  | Acetic acid, phenyl-, ethyl ester                      |
| 61 | 58.025 | 12.54 | Trisulfide, di-2-propenyl                              |
| 62 | 59.171 | 0.15  | 2,4-Decadienal, (E,E)-                                 |

|    |        |       |                                                                   |
|----|--------|-------|-------------------------------------------------------------------|
| 63 | 59.732 | 0.06  | Silanediol, dimethyl-                                             |
| 64 | 60.359 | 0.07  | Cyclononasiloxane, octadecamethyl-                                |
| 65 | 60.844 | 1.31  | 3-Vinyl-1,2-dithiacyclohex-5-ene                                  |
| 66 | 61.138 | 0.59  | Dodecanoic acid, ethyl ester                                      |
| 67 | 61.620 | 0.29  | Ethanone, 1-(1-cyclohexen-1-yl)-                                  |
| 68 | 62.606 | 0.11  | Benzyl alcohol                                                    |
| 69 | 64.441 | 0.83  | Benzeneethanol                                                    |
| 70 | 65.316 | 0.40  | Benzeneacetaldehyde, .alpha.-ethyl idene-                         |
| 71 | 65.961 | 0.18  | Trans-.beta.-Ionone                                               |
| 72 | 67.363 | 0.17  | Ethanone, 1-(1H-pyrrol-2-yl)-                                     |
| 73 | 71.488 | 1.56  | Tetradecanoic acid, ethyl ester                                   |
| 74 | 74.050 | 0.27  | Pentadecanoic acid, ethyl ester                                   |
| 75 | 74.492 | 0.30  | 1,2-Dithiolane                                                    |
| 76 | 74.762 | 0.16  | Ethyl 13-methyl-tetradecanoate                                    |
| 77 | 75.087 | 0.04  | 1,4,7,10,13,16, 19-Hepta-2-cycloheptacosanone                     |
| 78 | 76.349 | 0.16  | 1,2-Dimethyl-4-heptylcyclohexane                                  |
| 79 | 76.690 | 0.05  | 5-Methoxy-2-allylphenol                                           |
| 80 | 77.945 | 3.35  | 2-Methoxy-4-vinylphenol                                           |
| 81 | 78.782 | 0.05  | 12-Crown-4                                                        |
| 82 | 79.288 | 0.53  | Hexadecanoic acid, methyl ester                                   |
| 83 | 80.989 | 11.48 | Hexadecanoic acid, ethyl ester                                    |
| 84 | 82.126 | 0.36  | Ethyl 9-hexadecenoate                                             |
| 85 | 84.593 | 0.33  | 2(4H)-Benzofuranone, 5,6,7,7a- tetrahydro-4,4,7a-trimethyl-, (R)- |
| 86 | 86.492 | 1.13  | 4-Vinylphenol                                                     |

|             |        |       |                                             |
|-------------|--------|-------|---------------------------------------------|
| 87          | 89.734 | 0.27  | Octadecanoic acid. 17-methyl-, methyl ester |
| 88          | 90.526 | 1.57  | Ethyl oleate                                |
| 89          | 91.047 | 1.5   | 1,4,7,10,13,16-Hexaoxacyclooctadecane       |
| 90          | 92.429 | 6.3   | Linoleic acid ethyl ester                   |
| 91          | 94.473 | 2.58  | Ethyl 9,12,15-octadecatrienoate             |
| 92          | 95.142 | 0.85  | 21-Krone-7                                  |
| <b>Go-7</b> |        |       |                                             |
| 1           | 7.676  | 0.72  | Ethyl Acetate                               |
| 2           | 7.832  | 0.07  | Ethane, 1,1-diethoxy-                       |
| 3           | 7.958  | 0.24  | Hydroxyacetic acid, hydrazide               |
| 4           | 9.138  | 49.26 | Ethanol                                     |
| 5           | 16.014 | 0.98  | 1-Propanol, 2-methyl-                       |
| 6           | 17.596 | 0.10  | 3-Methylbutan-2-yl propyl carbonate         |
| 7           | 19.921 | 0.37  | Cyclopentasiloxane, decamethyl-             |
| 8           | 22.903 | 4.51  | 1-Butanol, 3-methyl- (impure)               |
| 9           | 24.492 | 0.15  | Ethyl hexanoate                             |
| 10          | 27.560 | 0.21  | 2-Butanone, 3-hydroxy-                      |
| 11          | 29.782 | 0.05  | Formic acid, butyl ester                    |
| 12          | 30.177 | 0.07  | 2-Heptanol                                  |
| 13          | 31.127 | 1.32  | Cyclohexasiloxane, dodecamethyl-            |
| 14          | 31.402 | 0.06  | 2-Hexanol, (R)-                             |
| 15          | 32.287 | 0.08  | 4-Pentenal                                  |
| 16          | 32.477 | 0.11  | Tridecane, 2-methyl-                        |
| 17          | 32.765 | 0.06  | (1H-Imidazol-4-yl)oxoacetic acid            |

|    |        |      |                                                     |
|----|--------|------|-----------------------------------------------------|
| 18 | 33.712 | 0.07 | 1-Propanol, 3-ethoxy-                               |
| 19 | 35.275 | 0.05 | 10-Methylnonadecane                                 |
| 20 | 35.505 | 0.05 | Pyrazine, trimethyl-                                |
| 21 | 37.455 | 0.39 | Octanoic acid, ethyl ester                          |
| 22 | 37.976 | 0.07 | 2-(5-Methyl-5-vinyltetrahydro-2-furanyl)-2-propanol |
| 23 | 38.438 | 0.13 | 1-Octen-3-ol                                        |
| 24 | 38.822 | 0.47 | Furfural                                            |
| 25 | 39.686 | 0.10 | 4-Decene, 2-methyl-, (E)-                           |
| 26 | 40.012 | 0.57 | 2,3,5,6 Tetramethyl pyrazine                        |
| 27 | 41.467 | 0.29 | 1,4-Hexadiene, 2,5-dimethyl-                        |
| 28 | 41.801 | 1.17 | Cycloheptasiloxane, tetradecamethyl-                |
| 29 | 42.547 | 0.34 | Benzaldehyde                                        |
| 30 | 43.755 | 0.08 | Nonanoic acid, ethyl ester                          |
| 31 | 44.381 | 0.59 | Linalool                                            |
| 32 | 44.932 | 0.05 | Pentadecane, 2-methyl-                              |
| 33 | 45.586 | 0.11 | 2-Furancarboxaldehyde, 5-methyl-                    |
| 34 | 45.808 | 0.06 | 3,5-Octadien-2-one                                  |
| 35 | 46.084 | 0.95 | 1,3-Butanediol                                      |
| 36 | 46.912 | 0.07 | 2-Cyclopenten-1-one, 3,5,5-trimethyl-               |
| 37 | 47.033 | 0.27 | Pentadecanoic acid, ethyl ester                     |
| 38 | 47.555 | 0.07 | Cyclohexanol, 2,6-dimethyl-                         |
| 39 | 48.071 | 0.51 | Neopentylidenecyclohexane                           |
| 40 | 48.659 | 0.02 | 3-Ethyl-2-ethoxy-phenol                             |
| 41 | 49.644 | 0.20 | Benzeneacetaldehyde                                 |



|    |        |       |                                                                               |
|----|--------|-------|-------------------------------------------------------------------------------|
| 42 | 49.813 | 0.45  | Decanoic acid, ethyl ester                                                    |
| 43 | 50.038 | 0.21  | 1,3-Cyclohexadiene-1-carboxaldehyde, 2,6,6-trimethyl-                         |
| 44 | 50.297 | 0.17  | Silanediol, dimethyl-                                                         |
| 45 | 50.808 | 0.73  | 2-Furanmethanol                                                               |
| 46 | 51.201 | 0.13  | 2-Isopropylfuran                                                              |
| 47 | 51.606 | 0.33  | Cyclooctasiloxane, hexadecamethyl-                                            |
| 48 | 51.821 | 0.10  | Butanedioic acid, diethyl ester                                               |
| 49 | 52.950 | 0.09  | 5-Hydroxy-6-methoxy-8-[(4-amino-1-methylbutyl)amino]quinoline trihydrobromide |
| 50 | 53.136 | 0.30  | 2-(4-Methyl-3-cyclohexen-1-yl)-2-propanol                                     |
| 51 | 57.181 | 0.73  | Methyl salicylate                                                             |
| 52 | 58.933 | 0.22  | 2,6-Di-O-methyl-d-galactopyranose                                             |
| 53 | 59.433 | 1.81  | Acetic acid, 2-phenylethyl ester                                              |
| 54 | 59.723 | 0.07  | Silanediol, dimethyl-                                                         |
| 55 | 59.858 | 0.07  | 2-Buten-1-one, 1-(2,6,6-trimethyl- 1,3-cyclohexadien-1-yl)-, (E)-             |
| 56 | 60.359 | 0.03  | Cyclononasiloxane, octadecamethyl-                                            |
| 57 | 61.137 | 0.83  | Dodecanoic acid. ethyl ester                                                  |
| 58 | 61.617 | 0.13  | Phenol, 2-methoxy-                                                            |
| 59 | 63.055 | 0.15  | Acetic acid, methoxy-, 2-phenylethyl ester                                    |
| 60 | 64.441 | 10.15 | Benzeneethanol                                                                |
| 61 | 65.964 | 0.15  | 3-Buten-2-one, 4-(2,6,6-trimethyl-1-cyclohexen-1-yl) -                        |
| 62 | 67.363 | 0.56  | Ethanone, 1-(1H-pyrrol-2-yl)-                                                 |
| 63 | 67.862 | 0.15  | 4,5-Diamino-6-hydroxypyrimidine                                               |
| 64 | 69.554 | 0.11  | Myristic acid, methyl ester                                                   |
| 65 | 70.226 | 0.12  | 2(3H)-Furanone, dihydro-5-pentyl-                                             |

|             |        |       |                                                                  |
|-------------|--------|-------|------------------------------------------------------------------|
| 66          | 71.028 | 0.12  | DL-cis-2-amino-trans-2-hydroxy-trans-decalin-9-carboxylic lactam |
| 67          | 71.486 | 1.22  | Tetradecanoic acid, ethyl ester                                  |
| 68          | 72.734 | 0.05  | 18-Crown-6, [2-(tetramethyl-1,3,2-dioxaborolan-2-yl)phenyl]-     |
| 69          | 74.049 | 0.11  | Ethyl 13-methyl-tetradecanoate                                   |
| 70          | 76.162 | 0.13  | 2-Methyl-trans-2,trans-4-hexadiene dioic acid                    |
| 71          | 76.347 | 0.08  | 12-Crown-4                                                       |
| 72          | 77.951 | 0.26  | 4-Vinyl-2-methoxy-phenol                                         |
| 73          | 79.290 | 0.70  | Hexadecanoic acid, methyl ester                                  |
| 74          | 80.983 | 6.49  | Hexadecanoic acid, ethyl ester                                   |
| 75          | 82.127 | 0.27  | Ethyl-9-hexadecenoate                                            |
| 76          | 84.590 | 0.20  | Dihydroactinidiolide                                             |
| 77          | 86.494 | 0.17  | 2-Methyl-1,3-dithiacyclopentane                                  |
| 78          | 89.091 | 0.08  | Octaethylene glycol monododecyl ether                            |
| 79          | 90.523 | 0.86  | (E)-9-Octadecenoic acid ethyl ester                              |
| 80          | 92.427 | 3.17  | Linoleic acid ethyl ester                                        |
| 81          | 94.473 | 1.77  | Ethyl 9,12,15-octadecatrienoate                                  |
| 82          | 96.983 | 0.92  | 1,4,7,10,13,16-Hexaoxacyclooctadane                              |
| <b>Go-8</b> |        |       |                                                                  |
| 1           | 7.671  | 0.93  | Acetic acid ethyl ester                                          |
| 2           | 7.954  | 0.10  | Acetic acid, hydroxy-, ethyl ester                               |
| 3           | 8.482  | 0.11  | Butanal, 3-methyl-                                               |
| 4           | 9.113  | 25.52 | Ethanol                                                          |
| 5           | 16.073 | 0.13  | 2-Propanol, 1-amino-                                             |
| 6           | 19.023 | 0.04  | Hexane-2,5-diol-D2                                               |

|    |        |      |                                         |
|----|--------|------|-----------------------------------------|
| 7  | 19.916 | 0.29 | Cyclopentasiloxane, decamethyl-         |
| 8  | 22.826 | 0.05 | 1-Butanol, 2-methyl-                    |
| 9  | 22.903 | 0.22 | 1-Butanol, 3-methyl-                    |
| 10 | 24.489 | 0.09 | Ethyl hexanoate                         |
| 11 | 27.328 | 0.37 | Disulfide, methyl 2-propenyl            |
| 12 | 27.564 | 0.14 | 2-Butanone, 3-hydroxy-                  |
| 13 | 27.850 | 0.08 | (1E)-1-(Methyldisulfanyl)-1-propen      |
| 14 | 27.954 | 0.09 | Octanal                                 |
| 15 | 30.149 | 0.06 | 2-Butenal, 3-methyl-                    |
| 16 | 31.125 | 1.26 | Cyclohexasiloxane, dodecamethyl-        |
| 17 | 31.41  | 0.19 | Acetic acid, methoxy-, methyl este      |
| 18 | 33.711 | 0.11 | Trisulfide, dimethyl                    |
| 19 | 37.454 | 0.10 | Octanoic acid, ethyl ester              |
| 20 | 38.438 | 0.06 | 1-Octen-3-ol                            |
| 21 | 38.830 | 0.79 | 2-Furan-carboxaldehyde                  |
| 22 | 39.171 | 0.18 | (E)-1-Allyl-2-(prop-1-en-1-yl)disulfane |
| 23 | 39.434 | 0.78 | Acetic acid                             |
| 24 | 40.103 | 1.88 | Diallyl disulphide                      |
| 25 | 40.480 | 0.65 | (Z)-1-Allyl-2(prop-1-en-1-yl)disulfane  |
| 26 | 41.801 | 0.83 | Tetradecamethylcycloheptasiloxane       |
| 27 | 42.545 | 5.75 | Benzaldehyde                            |
| 28 | 42.678 | 1.11 | 3H-1,2-Dithiole                         |
| 29 | 43.750 | 0.11 | Nonanoic acid, ethyl ester              |
| 30 | 43.885 | 0.85 | 2,3-Butanediol                          |

|    |        |      |                                           |
|----|--------|------|-------------------------------------------|
| 31 | 45.577 | 0.07 | 2-Furancarboxaldehyde, 5-methyl-          |
| 32 | 46.761 | 1.40 | Trisulfide, methyl 2-propenyl             |
| 33 | 46.902 | 0.05 | 2-Cyclopenten-1-one, 3,5,5-trimethyl-     |
| 34 | 48.069 | 0.07 | 2-Propen-1-one, 1-cyclohexyl-2-methyl-    |
| 35 | 48.557 | 0.08 | Benzoic acid, methyl ester                |
| 36 | 48.723 | 0.08 | 3-Butenoic acid                           |
| 37 | 49.640 | 0.89 | Benzeneacetaldehyde                       |
| 38 | 50.304 | 0.28 | Silanediol, dimethyl-                     |
| 39 | 50.804 | 0.31 | 2-Furanmethanol                           |
| 40 | 51.189 | 0.5  | Benzoic acid, ethyl ester                 |
| 41 | 51.608 | 0.10 | Cystine, TBS 2X                           |
| 42 | 51.801 | 0.42 | Butanedioic acid, diethyl ester           |
| 43 | 52.620 | 0.10 | 2-Cyclohexene-1,4-dione, 2,6,6-trimethyl- |
| 44 | 55.063 | 1.31 | 3-Vinyl-1,2-dithiacyclohex-4-ene          |
| 45 | 57.173 | 0.27 | Benzoic acid, 2-hydroxy-, methyl ester    |
| 46 | 57.819 | 0.10 | Acetic acid, phenyl-, ethyl ester         |
| 47 | 58.011 | 1.83 | Trisulfide, di-2-propenyl                 |
| 48 | 59.433 | 0.09 | Ethylphenyl-N-ethylamine                  |
| 49 | 59.755 | 0.07 | Silanediol, dimethyl-                     |
| 50 | 60.840 | 0.58 | 3-Vinyl-1,2-dithiacyclohex-5-ene          |
| 51 | 61.133 | 0.17 | Dodecanoic acid, ethyl ester              |
| 52 | 62.599 | 1.49 | Benzenemethanol                           |
| 53 | 64.438 | 0.43 | Phenylethyl Alcohol                       |
| 54 | 66.818 | 0.15 | 4H-Pyran-4-one, 3-hydroxy-2,6- dimethyl-  |

|             |        |       |                                                                  |
|-------------|--------|-------|------------------------------------------------------------------|
| 55          | 67.356 | 0.11  | Ethanone, 1- (1H-pyrrol-2-yl)-                                   |
| 56          | 68.145 | 0.09  | 7-Amino-4-methyl-2-quinolinol                                    |
| 57          | 68.990 | 0.26  | Phenol                                                           |
| 58          | 70.247 | 0.58  | Benzeneethanol, 2-methoxy-                                       |
| 59          | 71.485 | 0.66  | Tetradecanoic acid, ethyl ester                                  |
| 60          | 74.047 | 0.24  | Pentadecanoic acid, ethyl ester                                  |
| 61          | 76.693 | 0.07  | 2-Methoxy-4-[(1E)-1-propenyl]phenol                              |
| 62          | 77.068 | 0.35  | Phenol, 4-ethyl-                                                 |
| 63          | 77.945 | 0.15  | 5-Methoxy-2,3-dihydrobenzofuran                                  |
| 64          | 79.288 | 0.14  | Hexadecanoic acid, methyl ester                                  |
| 65          | 80.992 | 12.84 | Hexadecanoic acid, ethyl ester                                   |
| 66          | 82.125 | 0.31  | Ethyl 9-hexadecenoate                                            |
| 67          | 84.589 | 0.20  | 2(4H)-Benzofuranone, 5,6,7,7a-tetrahydro-4,4,7a-trimethyl-, (R)- |
| 68          | 89.732 | 0.63  | Octadecanoic acid, ethyl ester                                   |
| 69          | 90.528 | 5.71  | Ethyl oleate                                                     |
| 70          | 92.441 | 17.45 | Linoleic acid ethyl ester                                        |
| 71          | 94.475 | 3.54  | 9,12,15-Octadecatrienoic acid, ethyl ester, (Z,Z,Z)-             |
| 72          | 96.981 | 3.04  | 1,4,7,10,13,16-Hexaoxacyclooctadecane                            |
| <b>Go-9</b> |        |       |                                                                  |
| 1           | 7.675  | 1.98  | Acetic acid ethyl ester                                          |
| 2           | 7.955  | 0.11  | 1,2-Hydrazinedicarboxaldehyde                                    |
| 3           | 9.112  | 14.46 | Ethanol                                                          |
| 4           | 15.916 | 0.28  | 1- Propanol, 2-methyl-                                           |
| 5           | 17.631 | 0.42  | 1- Butanol, 3-methyl-, acetate                                   |

|    |        |      |                                                    |
|----|--------|------|----------------------------------------------------|
| 6  | 19.424 | 0.13 | Beta.-D-Ribopyranoside, methyl 2,3,4-tri-O-methyl- |
| 7  | 19.927 | 0.25 | Cyclopentasiloxane, decamethyl-                    |
| 8  | 22.807 | 0.20 | 2-Methylbutan-1-ol                                 |
| 9  | 22.884 | 1.01 | Oxirane, 2 -(1,1-dirnethylethyl) -3-methyl-        |
| 10 | 24.496 | 0.15 | Hexanoic acid, ethyl ester                         |
| 11 | 27.544 | 0.07 | 2-Butanone, 3-hydroxy-                             |
| 12 | 27.956 | 0.07 | Octanal                                            |
| 13 | 28.223 | 0.06 | Ethyl cis-4-hexenoate                              |
| 14 | 30.151 | 0.09 | Pyrazine, 2,5-dimethyl-                            |
| 15 | 31.125 | 1.22 | Cyclohexasiloxane, dodecamethyl-                   |
| 16 | 31.395 | 0.47 | Ethyl 2-hydroxypropanoate                          |
| 17 | 35.501 | 0.24 | Pyrazine, trimethyl-                               |
| 18 | 37.460 | 0.19 | Octanoic acid, ethyl ester                         |
| 19 | 37.971 | 0.07 | <i>cis</i> -Linaloloxide                           |
| 20 | 38.38  | 0.69 | 2-Furan-carboxaldehyde                             |
| 21 | 39.062 | 1.85 | Acetic acid                                        |
| 22 | 40.015 | 4.24 | 2,3,5,6 Tetramethyl pyrazine                       |
| 23 | 41.354 | 0.08 | Ethyl octan-2-yl carbonate                         |
| 24 | 41.457 | 0.20 | (3E,5E)-Hepta-3,5-dien-2-one                       |
| 25 | 41.807 | 1.81 | Cycloheptasiloxane, tetradecamethyl-               |
| 26 | 42.436 | 0.13 | 4-Ethyl-2,5,6-Trimethylpyrimidine                  |
| 27 | 42.544 | 0.37 | Benzaldehyde                                       |
| 28 | 43.747 | 0.10 | Nonanoic acid, ethyl ester                         |
| 29 | 43.880 | 0.15 | 1,3-Butanediol                                     |

|    |        |      |                                                               |
|----|--------|------|---------------------------------------------------------------|
| 30 | 44.077 | 0.10 | 2-Hexanol                                                     |
| 31 | 44.379 | 0.30 | 1,6-Octadien-3-ol, 3,7-dimethyl-                              |
| 32 | 45.407 | 0.10 | Ethyl 3-(methylsulfanyl)propanoate                            |
| 33 | 45.571 | 0.10 | 1H-Pyrazole, 1,3,5-trimethyl-                                 |
| 34 | 45.808 | 0.06 | 1-Propanone, 1-(2-furanyl)-                                   |
| 35 | 46.078 | 0.45 | 1,3-Butanediol                                                |
| 36 | 46.900 | 0.09 | 6-Methyl-3,5-heptadien-2-one                                  |
| 37 | 47.543 | 0.05 | Cyclohexanol, 1,2-dimethyl-, stereoisomer                     |
| 38 | 48.074 | 0.33 | (4E)-2,6-Dimethyl-2,4-heptadiene                              |
| 39 | 48.552 | 0.01 | Benzoic acid, methyl ester                                    |
| 40 | 49.647 | 0.22 | Benzeneacetaldehyde                                           |
| 41 | 49.810 | 0.17 | Decanoic acid, ethyl ester                                    |
| 42 | 50.038 | 0.13 | 1,3-Cyclohexadiene-1-carboxaldehyde, 2,6,6-trimethyl-         |
| 43 | 50.805 | 0.65 | 2-Furanmethanol                                               |
| 44 | 51.192 | 0.37 | Benzoic acid, ethyl ester                                     |
| 45 | 51.606 | 0.18 | Benzoic acid, 2,5-bis(trimethylsiloxy)-, trimethylsilyl ester |
| 46 | 51.805 | 0.23 | Butanedioic acid, diethyl ester                               |
| 47 | 53.132 | 0.18 | 3-Cyclohexene-1-methanol, .alpha.,.alpha.,4-trimethyl-        |
| 48 | 57.179 | 0.30 | Methyl salicylate                                             |
| 49 | 57.821 | 1.02 | Benzeneacetic acid, ethyl ester                               |
| 50 | 59.433 | 0.93 | Acetic acid, 2-phenylethyl ester                              |
| 51 | 59.714 | 0.06 | Silanediol, dimethyl-                                         |
| 52 | 61.136 | 0.94 | Dodecanoic acid, ethyl ester                                  |
| 53 | 61.624 | 0.14 | Phenol, 2-methoxy-                                            |

---

|    |        |       |                                                |
|----|--------|-------|------------------------------------------------|
| 54 | 62.597 | 0.11  | Benzyl alcohol                                 |
| 55 | 63.105 | 0.34  | Ethyl 3-phenylpropanoate                       |
| 56 | 64.439 | 3.41  | Benzeneethanol                                 |
| 57 | 65.313 | 0.13  | Benzeneacetaldehyde, .alpha.-ethylidene-       |
| 58 | 67.361 | 0.34  | Ethanone, 1-(1H-pyrrol-2-yl)-                  |
| 59 | 68.142 | 0.14  | 1-Methyl-5-phenyl-4-imidazolin-2-one           |
| 60 | 70.245 | 2.36  | Benzeneethanol, 2-methoxy-                     |
| 61 | 71.031 | 0.07  | 1,3-Dioxane, 2,4,4,6-tetramethyl-              |
| 62 | 71.485 | 2.25  | Tetradecanoic acid, ethyl ester                |
| 63 | 72.445 | 0.06  | 5-Methyl-2-phenyl-2-hexenal                    |
| 64 | 72.731 | 0.04  | Hexanoic acid, 5-hydroxy-4-oxo-, methyl ester, |
| 65 | 72.893 | 0.04  | 15-Crown-5                                     |
| 66 | 73.656 | 0.07  | 1H-Pyrrole-2-carboxaldehyde, 5-methyl-         |
| 67 | 74.050 | 0.25  | Undecanoic acid., 2,8-dimethyl-, methyl ester  |
| 68 | 74.762 | 0.21  | Methyl 2,6,10-trimethyltridecanoate            |
| 69 | 76.167 | 0.06  | Methyl 6-oxo-7-(2-oxocyclopentyl)heptanoate    |
| 70 | 76.349 | 0.14  | Pentadecanoic acid, ethyl ester                |
| 71 | 77.063 | 0.14  | <i>p</i> -Ethyl-phenol                         |
| 72 | 77.945 | 0.21  | 2-Methoxy-4-vinylphenol                        |
| 73 | 78.584 | 2.49  | Sorbic Acid                                    |
| 74 | 78.969 | 0.08  | 2,4-Hexadienoic acid, (E,E)-                   |
| 75 | 79.286 | 0.94  | Hexadecanoic acid, methyl ester                |
| 76 | 80.995 | 14.65 | Hexadecanoic acid, ethyl ester                 |
| 77 | 82.123 | 0.74  | Ethyl 9-hexadecenoate                          |

---



|              |        |       |                                                            |
|--------------|--------|-------|------------------------------------------------------------|
| 78           | 84.594 | 0.11  | 2(4H)-Benzofuranone, 5,6,7,7a-tetrahydro-4,4,7a-trimethyl- |
| 79           | 89.733 | 0.53  | Octadecanoic acid, 17-methyl-, methyl ester                |
| 80           | 90.526 | 5.72  | Ethyl (9Z)-9-octadecenoate                                 |
| 81           | 91.049 | 0.86  | 9,12-Octadecadienoic acid (Z,Z)-, methyl ester             |
| 82           | 92.441 | 19.71 | Linoleic acid ethyl ester                                  |
| 83           | 94.472 | 3.02  | 9,12,15-Octadecatrienoic acid, ethyl ester, (Z,Z,Z)-       |
| 84           | 94.625 | 0.06  | 21-Krone-7                                                 |
| 85           | 95.517 | 0.39  | 3,6,9,12,15-Pentaoxanonadecan-1-ol                         |
| 86           | 96.988 | 2.1   | 1,4,7,10,13,16-Hexaoxacyclooctadecane                      |
| <b>Go-10</b> |        |       |                                                            |
| 1            | 7.675  | 0.47  | Acetic acid., ethyl ester                                  |
| 2            | 7.962  | 0.09  | Acetic acid, hydroxy-                                      |
| 3            | 9.132  | 25.69 | Ethanol                                                    |
| 4            | 16.099 | 0.30  | 1-Propanol, 2-methyl-                                      |
| 5            | 17.557 | 0.05  | 1-Butanol, 3-methyl-, acetate                              |
| 6            | 19.366 | 0.06  | 1,3,4-Thiadiazol-2-amine                                   |
| 7            | 19.748 | 0.03  | Sulfurous acid, di(2-methyl-4-methoxybutyl) ester          |
| 8            | 19.916 | 0.10  | N-(4'-Chlorophenyl)-8-fluoro-3-methyl-isoalloxazine        |
| 9            | 22.013 | 0.02  | 1,3-dioxane-5,5-dimethanol, 2-methyl-                      |
| 10           | 22.911 | 1.30  | 1-Butanol, 3-methyl-                                       |
| 11           | 24.487 | 0.09  | Ethyl hexanoate                                            |
| 12           | 27.568 | 0.12  | 2-Butanone, 3-hydroxy-                                     |
| 13           | 28.221 | 0.27  | Ethyl trans-4-hexenoate                                    |
| 14           | 29.020 | 0.03  | 2-Hexenoic acid, ethyl ester                               |

|    |        |      |                                                                         |
|----|--------|------|-------------------------------------------------------------------------|
| 15 | 31.127 | 0.47 | Cyclohexasiloxane, dodecamethyl-                                        |
| 16 | 31.409 | 0.08 | Ethyl (S)-(-)-lactate                                                   |
| 17 | 32.767 | 0.03 | l-Methyl-3-cyclohexene-l-carboxylic acid                                |
| 18 | 33.719 | 0.04 | 1-Propanol, 3-ethoxy-                                                   |
| 19 | 35.266 | 0.03 | Ethanol, 2-(hexadecyloxy)-                                              |
| 20 | 35.501 | 0.06 | Pyrazine, trimethyl-                                                    |
| 21 | 37.453 | 0.14 | Octanoic acid, ethyl ester                                              |
| 22 | 37.979 | 0.03 | 2-Furanmethanol, 5-ethenyltetrahydro-.alpha.,.alpha.,5-trimethyl-, cis- |
| 23 | 38.828 | 0.20 | 2-Furan-carboxaldehyde                                                  |
| 24 | 40.015 | 1.26 | Pyrazine, tetramethyl-                                                  |
| 25 | 40.340 | 0.05 | Aloxiprin                                                               |
| 26 | 41.460 | 0.11 | (3E,5E)-Hepta-3,5-dien-2-one                                            |
| 27 | 41.805 | 1.56 | 2,4-Hexadienoic acid, ethyl ester,(2E,4E)-                              |
| 28 | 42.433 | 0.04 | 4-Ethyl-2,5,6-trimethylpyrimidine                                       |
| 29 | 42.544 | 0.16 | Benzaldehyde                                                            |
| 30 | 43.749 | 0.09 | Nonanoic acid, ethyl ester                                              |
| 31 | 44.376 | 0.10 | L-Linalool                                                              |
| 32 | 45.407 | 0.03 | 3-(Methylthio)propanoic acid ethyl ester                                |
| 33 | 45.569 | 0.06 | 2-Furancarboxaldehyde, 5-methyl-                                        |
| 34 | 46.087 | 1.07 | 2, 3-Butanediol                                                         |
| 35 | 46.912 | 0.03 | 2-Pentanol                                                              |
| 36 | 47.027 | 0.05 | Undecanoic acid, ethyl ester                                            |
| 37 | 47.555 | 0.03 | Methoxyacetic acid, 2-tridecyl ester                                    |
| 38 | 47.716 | 0.04 | Furan, tetrahydro-2,5-dimethyl-                                         |

|    |        |      |                                                       |
|----|--------|------|-------------------------------------------------------|
| 39 | 48.073 | 0.16 | 9-Undecenol, 2,10-dimethyl-                           |
| 40 | 49.658 | 0.10 | Oxirane, phenyl-                                      |
| 41 | 49.809 | 0.18 | Decanoic acid, ethyl ester                            |
| 42 | 50.038 | 0.11 | 1,3-Cyclohexadiene-1-carboxaldehyde, 2,6,6-trimethyl- |
| 43 | 50.299 | 0.15 | Silanediol, dimethyl-                                 |
| 44 | 50.806 | 0.38 | 2-Furanmethanol                                       |
| 45 | 51.191 | 0.10 | Benzoic acid, ethyl ester                             |
| 46 | 51.605 | 0.19 | Cyclooctasiloxane, hexadecamethyl-                    |
| 47 | 51.804 | 0.09 | Butanedioic acid, diethyl ester                       |
| 48 | 53.131 | 0.06 | Beta. Fenchyl alcohol                                 |
| 49 | 57.176 | 0.14 | Benzoic acid, 2-hydroxy-, methyl ester                |
| 50 | 57.821 | 0.69 | Acetic acid, phenyl-, ethyl ester                     |
| 51 | 58.360 | 0.25 | Ethanone, 1-(2-furanyl)-                              |
| 52 | 59.432 | 0.38 | Acetamide, N-(2-phenylethyl)-                         |
| 53 | 59.692 | 0.03 | Silanediol, dimethyl-                                 |
| 54 | 60.353 | 0.02 | Cyclononasiloxane, octadecamethyl-                    |
| 55 | 61.135 | 1.02 | Dodecanoic acid, ethyl ester                          |
| 56 | 61.624 | 0.06 | Phenol, 2-methoxy-                                    |
| 57 | 63.096 | 0.39 | Ethyl 3-phenylpropionate                              |
| 58 | 64.438 | 3.67 | Benezeneethanol                                       |
| 59 | 67.358 | 0.13 | Ethanone, 1-(1H-pyrrol-2-yl)-                         |
| 60 | 68.133 | 0.11 | Beta.-Ethylphenethyl alcohol                          |
| 61 | 70.246 | 2.58 | Guaiacol, 4-ethyl-                                    |
| 62 | 71.033 | 0.05 | 1,3,7,7-Tetramethyl-9-oxo-2-oxabicyclo[4.4.0]decane   |

|    |        |       |                                                      |
|----|--------|-------|------------------------------------------------------|
| 63 | 71.487 | 1.93  | Tetradecanoic acid, ethyl ester                      |
| 64 | 72.448 | 0.04  | (2E)-5-Methyl-2-phenyl-2-hexenal                     |
| 65 | 72.724 | 0.04  | 18-Crown-6, [2-(1,3,2-dioxaborolan-2-yl)phenyl]-     |
| 66 | 72.898 | 0.07  | 6-Ethyltetrazolo[1,5-c]pyrimidin-5(6H)-one           |
| 67 | 74.049 | 0.23  | Ethyl 13-methyl-tetradecanoate                       |
| 68 | 74.759 | 0.14  | Pentadecanoic acid, ethyl ester                      |
| 69 | 76.168 | 0.03  | (E/Z)-1-Methoxy-2-cyclopropylcyclopropane            |
| 70 | 76.340 | 0.12  | Ethyl 13-methyl-tetradecanoate                       |
| 71 | 77.070 | 0.19  | Phenol, 4-ethyl-                                     |
| 72 | 77.940 | 0.12  | 2-Methoxy-4-vinylphenol                              |
| 73 | 78.333 | 1.34  | Sorbic acid                                          |
| 74 | 79.287 | 0.22  | Pentadecanoic acid, 14-methyl-, methyl ester         |
| 75 | 81.014 | 16.77 | Hexadecanoic acid, ethyl ester                       |
| 76 | 81.809 | 0.09  | 15-Crown-5                                           |
| 77 | 82.126 | 0.75  | Ethyl 9-hexadecenoate                                |
| 78 | 83.749 | 0.14  | 12-Crown-4                                           |
| 79 | 84.599 | 0.08  | 2(4H)-Benzofuranone, 5,6,7,7a-tetra-trimethyl-       |
| 80 | 89.735 | 0.59  | Octadecanoic acid, ethyl ester                       |
| 81 | 90.535 | 5.62  | Ethyl (9Z)-9-Octadecenoate                           |
| 82 | 90.860 | 0.55  | Ethyl oleate                                         |
| 83 | 91.052 | 0.37  | 9,12-Octadecadienoic acid, methyl ester              |
| 84 | 92.460 | 20.00 | Linoleic acid ethyl ester                            |
| 85 | 94.473 | 2.82  | 9,12,15-Octadecatrienoic acid, ethyl ester, (Z,Z,Z)- |
| 86 | 95.142 | 2.28  | 1,4,7,10,13,16-Hexaoxacyclooctadecane                |

---

**Go-11**

|    |        |       |                                                                     |
|----|--------|-------|---------------------------------------------------------------------|
| 1  | 7.675  | 0.71  | Acetic acid ethyl ester                                             |
| 2  | 7.958  | 0.07  | Acetic acid, hydroxy-                                               |
| 3  | 9.122  | 10.98 | Ethanol                                                             |
| 4  | 15.935 | 0.18  | 1 -Propanol, 2-methyl-                                              |
| 5  | 17.629 | 0.06  | 1- Butanol, 3-methyl-, acetate                                      |
| 6  | 19.420 | 0.05  | Beta.-D-Ribopyranoside, methyl 2,3,4-tri-o-methyl-                  |
| 7  | 19.775 | 0.03  | Hexahydro-5H-imidazo[5,1-b:4,3-b'] bisthiazole                      |
| 8  | 19.926 | 0.05  | 6-Aza-5,7,12,14-tetrathiapentacene                                  |
| 9  | 22.886 | 0.56  | 1-Butanol, 3-methyl-                                                |
| 10 | 24.495 | 0.06  | Hexanoic acid, ethyl ester                                          |
| 11 | 27.550 | 0.06  | 2-Butanone, 3-hydroxy-                                              |
| 12 | 27.963 | 0.02  | 1, 2, 4-Butanetriol                                                 |
| 13 | 28.226 | 0.02  | Hex-4-enolc acid, ethyl ester                                       |
| 14 | 31.127 | 0.37  | Cyclohexasiloxane, dodecamethyl-                                    |
| 15 | 31.397 | 0.32  | Propanoic acid, 2-hydroxy-, ethyl ester, (S)-                       |
| 16 | 35.267 | 0.03  | Octadecane, 2-methyl-                                               |
| 17 | 37.455 | 0.09  | Octanoic acid, ethyl ester                                          |
| 18 | 37.974 | 0.03  | Ethyl 2-(5-methyl-5-vinyltetrahydrofuran-2-yl)propan-2-yl carbonate |
| 19 | 38.824 | 0.37  | 2-Furan-carboxaldehyde                                              |
| 20 | 40.009 | 0.40  | Pyrazine, tetramethyl-                                              |
| 21 | 41.809 | 0.72  | 2, 4-Hexadienoic acid, ethyl ester                                  |
| 22 | 42.540 | 1.63  | Benzaldehyde                                                        |
| 23 | 43.748 | 0.06  | Nonanoic acid, ethyl ester                                          |

---

|    |        |      |                                                       |
|----|--------|------|-------------------------------------------------------|
| 24 | 43.878 | 0.09 | 2, 3-Butanediol                                       |
| 25 | 44.075 | 0.04 | Oxirane, (methoxymethyl)-                             |
| 26 | 44.377 | 0.06 | Cyclohexene, 1-methyl-4-(1-methylethylidene)-         |
| 27 | 45.569 | 0.09 | 2-Furancarboxaldehyde, 5-methyl-                      |
| 28 | 45.803 | 0.02 | 1-Propanone, 1-(2-furanyl)-                           |
| 29 | 46.083 | 0.21 | 2,3-Butanediol                                        |
| 30 | 46.910 | 0.03 | 4-Hydroxy-4-methyl-2,5-cyclohexadienone               |
| 31 | 48.069 | 0.13 | 9-Undecenol, 2,10-dimethyl-                           |
| 32 | 48.65  | 0.00 | (R*,S*)-2-(1-hydroxyethyl)oxirancarboxylate           |
| 33 | 49.645 | 0.04 | Phenyl acetaldehyde                                   |
| 34 | 49.810 | 0.14 | Decanoic acid, ethyl ester                            |
| 35 | 50.036 | 0.07 | 1,3-Cyclohexadiene-1-carboxaldehyde, 2,6,6-trimethyl- |
| 36 | 50.296 | 0.07 | Silanediol, dimethyl-                                 |
| 37 | 50.802 | 0.13 | 2- Furanmethanol                                      |
| 38 | 51.195 | 0.11 | Benzoic acid, ethyl ester                             |
| 39 | 51.608 | 0.02 | Hexadecamethylcyclooctasiloxane                       |
| 40 | 51.801 | 0.44 | Butanedioic acid, diethyl ester                       |
| 41 | 52.950 | 0.02 | Imidodicarbonic acid, diethyl ester                   |
| 42 | 53.135 | 0.03 | Beta. Fenchyl alcohol                                 |
| 43 | 55.596 | 0.06 | Ethyl 2-Ethylcyclopentaneacetate                      |
| 44 | 57.176 | 0.23 | Methyl salicylate                                     |
| 45 | 57.819 | 0.39 | Benzeneacetic acid, ethyl ester                       |
| 46 | 58.358 | 0.97 | 1-Butanone, 1-(2-furanyl)-                            |
| 47 | 59.430 | 0.27 | Acetic acid, 2-phenylethyl ester                      |

|    |        |      |                                                     |
|----|--------|------|-----------------------------------------------------|
| 48 | 59.709 | 0.02 | Silanediol, dimethyl-                               |
| 49 | 61.137 | 1.32 | Dodecanoic acid, ethyl ester                        |
| 50 | 61.617 | 0.05 | Phenol, 2-methoxy-                                  |
| 51 | 62.597 | 1.81 | Benzyl alcohol                                      |
| 52 | 63.100 | 0.05 | Ethyl 3-phenylpropionate                            |
| 53 | 64.436 | 1.27 | Benzeneethanol                                      |
| 54 | 65.315 | 0.08 | Benzeneacetaldehyde, .alpha.-ethylidene-            |
| 55 | 65.961 | 0.05 | Trans-.beta.-Ionone                                 |
| 56 | 67.355 | 0.08 | Ethanone, 1-(1H-pyrrol-2-yl)-                       |
| 57 | 69.118 | 0.10 | Tetradecanoic acid, ethyl ester                     |
| 58 | 69.549 | 0.05 | Myristic acid, methyl ester                         |
| 59 | 70.245 | 2.71 | Benzeneethanol, 2-methoxy-                          |
| 60 | 70.929 | 0.23 | Butanedioic acid, hydroxy-, diethyl ester, (. +.-)- |
| 61 | 71.490 | 2.86 | Tetradecanoic acid, ethyl ester                     |
| 62 | 72.450 | 0.06 | 5-Methyl-2-phenyl-2-hexenal                         |
| 63 | 72.907 | 0.13 | 6-Ethyltetrazolo[1,5-c]pyrimidin-5(6H)-one          |
| 64 | 73.101 | 0.05 | 3-Hydroxy-N,N-dimethylpropanamide                   |
| 65 | 73.661 | 0.06 | 1H-Pyrrole-2-carboxaldehyde, 1-methyl-              |
| 66 | 74.763 | 0.52 | Pentadecanoic acid, ethyl ester                     |
| 67 | 76.169 | 0.14 | 1-(2-Ethoxyethenyl)cyclopropane                     |
| 68 | 76.338 | 0.17 | Pentadecanoic acid, ethyl ester                     |
| 69 | 76.836 | 9.3  | Sorbic acid                                         |
| 70 | 77.058 | 2.28 | 2,4-Hexadienoic acid, (E,E)-                        |
| 71 | 79.285 | 0.67 | Hexadecanoic acid, methyl ester                     |

|              |        |       |                                                            |
|--------------|--------|-------|------------------------------------------------------------|
| 72           | 81.024 | 16.48 | Hexadecanoic acid, ethyl ester                             |
| 73           | 82.127 | 1.07  | Ethyl 9-hexadecenoate                                      |
| 74           | 84.592 | 0.10  | 2(4H)-Benzofuranone, 5,6,7,7a-tetrahydro-4,4,7a-trimethyl- |
| 75           | 84.703 | 0.08  | Methyl 9,12-heptadecadienoate                              |
| 76           | 85.441 | 0.04  | Heptadecanoic acid, ethyl ester                            |
| 77           | 89.739 | 0.53  | Octadecanoic acid, ethyl ester                             |
| 78           | 90.538 | 7.56  | Ethyl oleate                                               |
| 79           | 91.052 | 0.73  | 9,12-Octadecadienoic acid (Z,Z)-,methyl ester              |
| 80           | 92.476 | 24.10 | Linoleic acid ethyl ester                                  |
| 81           | 94.478 | 2.61  | 9,12,15-Octadecatrienoic acid, ethyl ester, (Z,Z,Z)-       |
| 82           | 95.144 | 1.96  | 1,4,7,10,13,16-Hexaoxacyclooctadecane                      |
| <b>Go-12</b> |        |       |                                                            |
| 1            | 7.676  | 0.53  | Ethyl Acetate                                              |
| 2            | 9.119  | 29.17 | Ethanol                                                    |
| 3            | 15.919 | 0.53  | 1-Propanol, 2-methyl-                                      |
| 4            | 17.629 | 0.07  | Ethane, 1,1-diethoxy-                                      |
| 5            | 19.425 | 0.06  | 1-Propene, 1,3,3-trimethoxy-                               |
| 6            | 19.926 | 0.63  | Cyclopentasiloxane, decamethyl-                            |
| 7            | 22.180 | 0.06  | Oxazole, trimethyl-                                        |
| 8            | 22.884 | 2.82  | 1-Butanol, 3-methyl-                                       |
| 9            | 24.266 | 0.09  | Furan, 2-pentyl-                                           |
| 10           | 24.499 | 0.15  | Ethyl hexanoate                                            |
| 11           | 27.541 | 0.21  | 2-Butanone, 3-hydroxy-                                     |
| 12           | 30.154 | 0.18  | Pyrazine, 2,5-dimethyl-                                    |



|    |        |       |                                                       |
|----|--------|-------|-------------------------------------------------------|
| 13 | 31.125 | 1.91  | Cyclohexasiloxane, dodecamethyl-                      |
| 14 | 32.288 | 0.12  | 1-Hexanol                                             |
| 15 | 35.494 | 0.76  | Pyrazine, trimethyl-                                  |
| 16 | 37.458 | 0.13  | Octanoic acid, ethyl ester                            |
| 17 | 38.437 | 0.07  | 1-Octen-3-ol                                          |
| 18 | 38.823 | 0.39  | 2 -Furan-carboxaldehyde                               |
| 19 | 39.156 | 0.08  | Pyrazine, 2,6-diethyl-                                |
| 20 | 40.023 | 19.71 | Pyrazine, tetramethyl-                                |
| 21 | 41.459 | 0.25  | (3E,5E)-Hepta-3,5-dien-2-one                          |
| 22 | 41.800 | 1.10  | Cycloheptasiloxane, tetradecamethyl-                  |
| 23 | 42.433 | 0.52  | 2,3,5-Trimethyl-6-ethylpyrazine                       |
| 24 | 42.544 | 0.30  | Benzaldehyde                                          |
| 25 | 43.747 | 0.06  | Nonanoic acid, ethyl ester                            |
| 26 | 44.377 | 0.15  | L-Linalool                                            |
| 27 | 45.409 | 0.09  | Ethyl 3-(methylsulfanyl)propanoate                    |
| 28 | 46.088 | 0.41  | 1,3-Butanediol                                        |
| 29 | 46.895 | 0.08  | 5-Hepten-2-one, 3-methylene-                          |
| 30 | 47.531 | 0.09  | 6-Hydroxy-2,6-dimethyl-5,6-dihydro-2H-pyran           |
| 31 | 47.733 | 0.16  | Propanoic acid, 2-methyl-                             |
| 32 | 47.924 | 0.14  | Hydrazine, 1,1-diethyl-                               |
| 33 | 48.066 | 0.33  | Hexyl 8-methylnon-6-enoate                            |
| 34 | 49.658 | 0.36  | Phenyl acetaldehyde                                   |
| 35 | 50.034 | 0.11  | 1,3-Cyclohexadiene-1-carboxaldehyde, 2,6,6-trimethyl- |
| 36 | 58.801 | 0.49  | 2-Furanmethanol                                       |

|    |        |       |                                                                                                                                                                                              |
|----|--------|-------|----------------------------------------------------------------------------------------------------------------------------------------------------------------------------------------------|
| 37 | 51.192 | 0.09  | (3aS,3bR,9bR,10R,11S,11aS)-10-(benzoyloxy)-2,2-dimethyl-4-[(4-methylphenyl)sulfonyl]-7,8-bis(trimethylsilyl)-3a,3b,4,5,9b,10,11,11a-octahydro[1,3]dioxolo[4,5-c]phenanthridin-11-yl benzoate |
| 38 | 51.605 | 0.06  | Cyclododecasiloxane, tetracosamethyl-                                                                                                                                                        |
| 39 | 51.804 | 0.19  | Butanedioic acid, diethyl ester                                                                                                                                                              |
| 40 | 53.129 | 0.09  | L-.Alpha.-terpineol                                                                                                                                                                          |
| 41 | 57.176 | 0.23  | Benzoic acid, 2-hydroxy-, methyl ester                                                                                                                                                       |
| 42 | 57.820 | 0.40  | Benzeneacetic acid, ethyl ester                                                                                                                                                              |
| 43 | 59.431 | 0.19  | Acetamide, N-(2-phenylethyl)-                                                                                                                                                                |
| 44 | 59.730 | 0.06  | Silanediol, dimethyl-                                                                                                                                                                        |
| 45 | 61.133 | 0.28  | Dodecanoic acid, ethyl ester                                                                                                                                                                 |
| 46 | 62.592 | 0.20  | Benzyl alcohol                                                                                                                                                                               |
| 47 | 64.436 | 3.84  | Benzeneethanol                                                                                                                                                                               |
| 48 | 67.356 | 0.36  | Ethanone, 1-(1H-pyrrol-2-yl)-                                                                                                                                                                |
| 49 | 68.139 | 0.20  | Benzene, 1,3-diisocyanato-2-methyl                                                                                                                                                           |
| 50 | 68.997 | 0.11  | Phenol                                                                                                                                                                                       |
| 51 | 70.230 | 0.17  | 2(3H)-Furanone, dihydro-5-pentyl-                                                                                                                                                            |
| 52 | 71.481 | 0.98  | Tetradecanoic acid, ethyl ester                                                                                                                                                              |
| 53 | 74.047 | 0.15  | Pentadecanoic acid, ethyl ester                                                                                                                                                              |
| 54 | 74.759 | 0.12  | Alpha.-D-galactopyranoside, methyl 2,3,4,6-tetra-O-methyl-                                                                                                                                   |
| 55 | 76.342 | 0.08  | 12-Crown-4                                                                                                                                                                                   |
| 56 | 77.941 | 0.70  | 2-Methoxy-4-vinylphenol                                                                                                                                                                      |
| 57 | 78.783 | 0.11  | 15-Crown-5                                                                                                                                                                                   |
| 58 | 79.284 | 0.46  | Hexadecanoic acid, methyl ester                                                                                                                                                              |
| 59 | 80.984 | 10.48 | Hexadecanoic acid, ethyl ester                                                                                                                                                               |

|              |        |       |                                                            |
|--------------|--------|-------|------------------------------------------------------------|
| 60           | 82.117 | 0.22  | Ethyl 9-hexadecenoate                                      |
| 61           | 84.592 | 0.26  | 2(4H)-Benzofuranone, 5,6,7,7a-tetrahydro-4,4,7a-trimethyl- |
| 62           | 89.733 | 7.4   | 1,4,7,10,13,16-Hexaoxacyclooctadecane                      |
| 63           | 90.524 | 1.99  | Ethyl oleate                                               |
| 64           | 92.427 | 7.81  | Linoleic acid ethyl ester                                  |
| 65           | 95.307 | 0.42  | 21-Krone-7                                                 |
| <b>Go-13</b> |        |       |                                                            |
| 1            | 7.676  | 0.78  | Ethyl Acetate                                              |
| 2            | 7.958  | 0.18  | Ethanol, 2-ethoxy-                                         |
| 3            | 9.126  | 22.81 | Ethanol                                                    |
| 4            | 16.019 | 0.15  | 1-Propanol, 2-methyl-                                      |
| 5            | 17.588 | 0.05  | 1 -Butanol, 3-methyl-, acetate                             |
| 6            | 19.920 | 0.26  | Cyclopentasiloxane, decamethyl-                            |
| 7            | 21.766 | 0.03  | Pentanoic acid, 4-methyl-, ethyl ester                     |
| 8            | 22.819 | 0.13  | 1-Butanol, 2-methyl-                                       |
| 9            | 22.895 | 0.46  | 1-Butanol, 3-methyl-                                       |
| 10           | 24.491 | 0.19  | Hexanoic acid, ethyl ester                                 |
| 11           | 27.560 | 0.11  | 2-Butanone, 3-hydroxy-                                     |
| 12           | 27.955 | 0.03  | Guanosine                                                  |
| 13           | 30.146 | 0.12  | Pyrazine, 2,5-dimethyl-                                    |
| 14           | 30.959 | 0.02  | Ethyl heptanoate                                           |
| 15           | 31.124 | 0.79  | Cyclohexasiloxane, dodecamethyl-                           |
| 16           | 31.400 | 0.23  | Ethyl 2-hydroxypropanoate                                  |
| 17           | 32.282 | 0.05  | 1-Hexanol                                                  |

|    |        |      |                                                     |
|----|--------|------|-----------------------------------------------------|
| 18 | 32.471 | 0.03 | 10-Methylnonadecane                                 |
| 19 | 32.758 | 0.04 | (1H-Imidazol-4-yl)oxoacetic acid                    |
| 20 | 35.261 | 0.03 | Decane                                              |
| 21 | 35.498 | 0.18 | Pyrazine, trimethyl-                                |
| 22 | 37.454 | 0.20 | Octanoic acid, ethyl ester                          |
| 23 | 37.980 | 0.03 | 2-(5-Methyl-5-vinyltetrahydro-2-furanyl)-2-propanol |
| 24 | 38.175 | 0.04 | 2-Propen-1-ol, 2-methyl-                            |
| 25 | 38.438 | 0.03 | 1-Octen-3-ol                                        |
| 26 | 38.826 | 0.81 | Furfural                                            |
| 27 | 39.158 | 0.57 | Acetic acid                                         |
| 28 | 40.013 | 1.97 | Pyrazine, tetramethyl-                              |
| 29 | 40.937 | 0.11 | 2-Heptanol                                          |
| 30 | 41.461 | 0.18 | (3E,5E)-Hepta-3,5-dien-2-one                        |
| 31 | 41.793 | 1.08 | Cycloheptasiloxane, tetradecamethyl-                |
| 32 | 42.434 | 0.06 | 2,3,5-Trimethyl-6-ethylpyrazine                     |
| 33 | 42.540 | 0.16 | Benzaldehyde                                        |
| 34 | 43.746 | 0.05 | Nonanoic acid, ethyl ester                          |
| 35 | 43.876 | 0.29 | 2,3-Butanediol                                      |
| 36 | 44.075 | 0.06 | Ether, sec-butyl isopropyl                          |
| 37 | 44.379 | 0.14 | Cyclohexene, 1-methyl-4-(1-methylethylidene)-       |
| 38 | 45.571 | 0.19 | 2-Furancarboxaldehyde, 5-methyl-                    |
| 39 | 45.801 | 0.06 | (2S,6S)-Bicyclo[2.2.2]octane-2,6-diol               |
| 40 | 46.078 | 0.53 | 1,3-Butanediol                                      |
| 41 | 46.899 | 0.07 | 6-Methyl-3,5-heptadiene-2-one                       |

|    |        |      |                                                            |
|----|--------|------|------------------------------------------------------------|
| 42 | 47.026 | 0.07 | Tetradecanoic acid, ethyl ester                            |
| 43 | 47.552 | 0.04 | Cyclohexanol, 1,2-dimethyl-, cis-                          |
| 44 | 47.907 | 0.05 | 6-Nitrohexan-2,3-dione                                     |
| 45 | 48.070 | 0.38 | 9-Undecenol, 2,10-dimethyl-                                |
| 46 | 48.654 | 0.12 | 1-Cyclohexene-1-propanol, .alpha.,Gamma,2,6,6-pentamethyl- |
| 47 | 49.652 | 0.10 | Benzeneacetaldehyde                                        |
| 48 | 49.806 | 0.11 | Decanoic acid, ethyl ester                                 |
| 49 | 50.037 | 0.09 | 1,3-Cyclohexadiene-1-carboxaldehyde, 2,6,6-trimethyl-      |
| 50 | 50.304 | 0.08 | Silanediol, dimethyl-                                      |
| 51 | 50.803 | 0.56 | 2- Furanmethanol                                           |
| 52 | 51.193 | 0.11 | Benzoic acid. ethyl ester                                  |
| 53 | 51.373 | 0.04 | 2,3,4-Trimethylfuran                                       |
| 54 | 51.600 | 0.38 | Cyclooctasiloxane, hexadecamethyl-                         |
| 55 | 51.800 | 0.34 | Butanedioic acid, diethyl ester                            |
| 56 | 52.942 | 0.02 | (-)-Isolongifolol, acetate                                 |
| 57 | 53.134 | 0.11 | 2-(4-Methyl-3-cyclohexen-1-yl)-2-propanol                  |
| 58 | 57.175 | 0.37 | Methyl salicylate                                          |
| 59 | 57.819 | 0.96 | Benzeneacetic acid, ethyl ester                            |
| 60 | 58.356 | 0.05 | 1-(Furan-2-yl)-4-methylpentan-1-on                         |
| 61 | 59.430 | 0.29 | 2-Pentanone, 5-phenyl-                                     |
| 62 | 59.724 | 0.03 | Silanediol, dimethyl-                                      |
| 63 | 60.349 | 0.03 | Cyclononasiloxane, octadecamethyl-                         |
| 64 | 61.134 | 0.72 | Dodecanoic acid, ethyl ester                               |
| 65 | 61.615 | 0.09 | Phenol, 2-methoxy-                                         |

---

|    |        |       |                                                      |
|----|--------|-------|------------------------------------------------------|
| 66 | 62.598 | 0.16  | Benzyl alcohol                                       |
| 67 | 63.101 | 0.22  | Ethyl 3-phenylpropionate                             |
| 68 | 64.434 | 1.53  | Benzeneethanol                                       |
| 69 | 65.311 | 0.15  | Benzeneacetaldehyde, .alpha.-ethylidene-             |
| 70 | 65.961 | 0.09  | Trans-.beta.-ionone                                  |
| 71 | 67.357 | 0.25  | Ethanone, 1-(1H-pyrrol-2-yl)-                        |
| 72 | 68.995 | 0.02  | Phenol                                               |
| 73 | 69.550 | 0.05  | Methyl tetradecanoate                                |
| 74 | 70.225 | 0.12  | 2(3H)-Furanone, dihydro-5-pentyl-                    |
| 75 | 70.945 | 0.06  | Butanedioic acid, hydroxy-, diethyl ester, (. +/-.)- |
| 76 | 71.484 | 2.30  | Tetradecanoic acid, ethyl ester                      |
| 77 | 72.902 | 0.04  | Tetraethyleneglycol monomethylethe                   |
| 78 | 73.657 | 0.07  | 3-Pyridinemethanol                                   |
| 79 | 74.047 | 0.24  | Pentadecanoic acid, ethyl ester                      |
| 80 | 74.161 | 0.03  | 1,6-Dideoxy-2,4-monoethylene-d-altritol              |
| 81 | 74.760 | 0.15  | Octadecanoic acid, 17-methyl-, methyl ester          |
| 82 | 76.160 | 0.14  | 1-(2-Ethoxyethenyl)cyclopropane                      |
| 83 | 76.337 | 0.09  | Ethyl 13-methyl-tetradecanoate                       |
| 84 | 77.943 | 0.24  | 4-Vinyl-2-methoxy-phenol                             |
| 85 | 78.774 | 0.06  | Hexadecanoic acid, ethyl ester                       |
| 86 | 79.026 | 0.11  | Diethyl azelate                                      |
| 87 | 79.287 | 0.56  | Hexadecanoic acid, methyl ester                      |
| 88 | 81.012 | 20.32 | Hexadecanoic acid, ethyl ester                       |
| 89 | 82.126 | 0.61  | Ethyl 9-hexadecenoate                                |

---

|              |        |       |                                                                  |
|--------------|--------|-------|------------------------------------------------------------------|
| 90           | 84.586 | 0.17  | 2(4H)-Benzofuranone, 5,6,7,7a-tetrahydro-4,4,7a-trimethyl-, (R)- |
| 91           | 86.487 | 2.34  | 1,4,7,10,13,16-Hexaoxacyclooctadecane                            |
| 92           | 89.734 | 0.70  | Octadecanoic acid, ethyl ester                                   |
| 93           | 90.528 | 5.61  | Ethyl oleate                                                     |
| 94           | 90.888 | 0.95  | 5-Hydroxymethylfurfural                                          |
| 95           | 91.049 | 0.84  | 9,12-Octadecadienoic acid (Z,Z)-, methyl ester                   |
| 96           | 92.454 | 20.00 | Linoleic acid ethyl ester                                        |
| 97           | 94.471 | 3.06  | Ethyl 9,12,15-octadecatrienoate                                  |
| 98           | 95.295 | 0.25  | 3,6,9,12,15-Pentaoxanonadecan-1-ol                               |
| <b>Go-14</b> |        |       |                                                                  |
| 1            | 7.676  | 0.75  | Ethyl Acetate                                                    |
| 2            | 7.960  | 0.15  | Hydrazine, 2-propenyl-                                           |
| 3            | 9.110  | 17.40 | Ethanol                                                          |
| 4            | 15.958 | 0.26  | 1-Propanol, 2-methyl-                                            |
| 5            | 17.621 | 0.09  | 1-Butanol, 3-methyl-, acetate                                    |
| 6            | 19.924 | 0.33  | Cyclopentasiloxane, decamethyl-                                  |
| 7            | 22.182 | 0.08  | Oxazole, trimethyl-                                              |
| 8            | 22.887 | 1.46  | 1-Butanol, 3-methyl- (impure) (CAS                               |
| 9            | 24.260 | 0.08  | Furan, 2-pentyl-                                                 |
| 10           | 27.549 | 0.20  | 2-Butanone, 3-hydroxy-                                           |
| 11           | 30.144 | 0.49  | Pyrazine, 2,5-dimethyl-                                          |
| 12           | 31.125 | 1.67  | Cyclohexasiloxane, dodecamethyl-                                 |
| 13           | 31.395 | 0.23  | Ethyl 2-hydroxypropanoate                                        |
| 14           | 32.282 | 0.12  | 1-Hexanol                                                        |

|    |        |       |                                                       |
|----|--------|-------|-------------------------------------------------------|
| 15 | 35.496 | 1.49  | Pyrazine, trimethyl-                                  |
| 16 | 37.457 | 0.13  | Octanoic acid, ethyl ester                            |
| 17 | 37.972 | 0.10  | 2-(5-Methyl-5-vinyltetrahydro-2-furanyl)-2-propanol   |
| 18 | 38.173 | 0.15  | 2-Propen-1-ol, 2-methyl-                              |
| 19 | 38.437 | 0.08  | 1-Octen-3-ol                                          |
| 20 | 38.824 | 0.48  | 2-Furan-carboxaldehyde                                |
| 21 | 39.165 | 0.14  | 2,3-Dimethyl-5-ethylpyrazine                          |
| 22 | 40.024 | 22.34 | Pyrazine, tetramethyl-                                |
| 23 | 41.459 | 0.46  | Ethanone, 1-(2-furanyl)-                              |
| 24 | 41.795 | 1.64  | Tetradecamethyl-cyclo-hepta-siloxane                  |
| 25 | 42.432 | 0.78  | 4-Ethyl-2,5,6-trimethylpyrimidine                     |
| 26 | 42.540 | 0.35  | Benzaldehyde                                          |
| 27 | 43.872 | 0.72  | 2,3-Butanediol                                        |
| 28 | 44.059 | 0.12  | 2-Hexanol                                             |
| 29 | 44.376 | 0.45  | Linalool                                              |
| 30 | 45.581 | 0.06  | 2-Furancarboxaldehyde, 5-methyl-                      |
| 31 | 46.895 | 0.25  | 6-Methyl-3,5-heptadiene-2-one                         |
| 32 | 47.151 | 0.11  | Thiazole, 5-methoxy-                                  |
| 33 | 47.543 | 0.09  | Cyclohexanol, 2,6-dimethyl-                           |
| 34 | 47.729 | 0.16  | Propanoic acid, 2-methyl-                             |
| 35 | 47.921 | 0.52  | Acetic acid ethyl ester                               |
| 36 | 49.633 | 0.56  | Benzeneacetaldehyde                                   |
| 37 | 50.040 | 0.44  | 1,3-Cyclohexadiene-1-carboxaldehyde, 2,6,6-trimethyl- |
| 38 | 50.319 | 0.16  | Silanediol, dimethyl-                                 |



|    |        |      |                                                        |
|----|--------|------|--------------------------------------------------------|
| 39 | 50.802 | 0.78 | 2-Furanmethanol                                        |
| 40 | 51.194 | 0.13 | 2-Isopropylfuran                                       |
| 41 | 51.602 | 0.52 | Cyclooctasiloxane, hexadecamethyl-                     |
| 42 | 51.814 | 0.14 | 4-(Difluoromethyl)pyridine                             |
| 43 | 53.135 | 0.19 | 3-Cyclohexene-1-methanol, .alpha.,.alpha.,4-trimethyl- |
| 44 | 57.817 | 0.44 | Benzeneacetic acid, ethyl ester                        |
| 45 | 59.426 | 0.20 | B-Phenylethyl acetate                                  |
| 46 | 59.723 | 0.07 | Silanediol, dimethyl-                                  |
| 47 | 60.353 | 0.05 | Octadecamethylcyclononasiloxane                        |
| 48 | 61.132 | 0.30 | Dodecanoic acid, ethyl ester                           |
| 49 | 61.619 | 0.14 | Phenol, 2-methoxy-                                     |
| 50 | 62.592 | 0.22 | Benzyl alcohol                                         |
| 51 | 64.435 | 2.99 | Benzeneethanol                                         |
| 52 | 65.964 | 0.12 | Trans-.beta.-ionone                                    |
| 53 | 67.355 | 0.91 | Ethanone, 1- (1H-pyrrol-2-yl)-                         |
| 54 | 68.137 | 0.20 | 4H-1-Benzopyran-2-carboxaldehyde, 4-oxo-               |
| 55 | 68.996 | 0.27 | Phenol                                                 |
| 56 | 70.223 | 0.17 | Thiazole                                               |
| 57 | 71.483 | 1.44 | Tetradecanoic acid, ethyl ester                        |
| 58 | 73.652 | 0.10 | Nicotinyl alcohol                                      |
| 59 | 74.043 | 0.14 | Pentadecanoic acid, ethyl ester                        |
| 60 | 74.759 | 0.17 | Ethyl 13-methyl-tetradecanoate                         |
| 61 | 77.947 | 0.30 | 2-Methoxy-4-vinylphenol                                |
| 62 | 79.286 | 0.44 | Hexadecanoic acid, methyl ester                        |

|              |        |       |                                                            |
|--------------|--------|-------|------------------------------------------------------------|
| 63           | 80.983 | 12.36 | Hexadecanoic acid, ethyl ester                             |
| 64           | 82.124 | 0.35  | Ethyl 9-hexadecenoate                                      |
| 65           | 84.587 | 0.34  | 2(4H)-Benzofuranone, 5,6,7,7a-tetrahydro-4,4,7a-trimethyl- |
| 66           | 89.731 | 0.40  | Octadecanoic acid, 17-methyl-, methyl ester                |
| 67           | 90.522 | 3.46  | Ethyl oleate                                               |
| 68           | 90.890 | 0.66  | 2-Furaldehyde, 5-(hydroxymethyl)-                          |
| 69           | 92.428 | 9.37  | Linoleic acid ethyl ester                                  |
| 70           | 94.471 | 3.82  | Ethyl 9,12,15-octadecatrienoate                            |
| 71           | 94.705 | 0.38  | 21-Krone-7                                                 |
| 72           | 95.029 | 3.28  | 1,4,7,10,13,16-Hexaoxacyclooctadecane                      |
| <b>Go-15</b> |        |       |                                                            |
| 1            | 7.675  | 0.71  | Ethyl Acetate                                              |
| 2            | 7.957  | 0.18  | Propane, 1-ethoxy-                                         |
| 3            | 9.120  | 25.98 | Ethanol                                                    |
| 4            | 15.992 | 0.24  | 1-Propanol, 2-methyl-                                      |
| 5            | 19.918 | 0.62  | Cyclopentasiloxane, decamethyl-                            |
| 6            | 22.185 | 0.05  | Oxazole, trimethyl-                                        |
| 7            | 22.891 | 1.09  | 1-Butanol, 3-methyl-                                       |
| 8            | 27.549 | 0.17  | 2-Butanone, 3-hydroxy-                                     |
| 9            | 27.952 | 0.06  | Octanal                                                    |
| 10           | 30.147 | 0.27  | Pyrazine, 2,5-dimethyl-                                    |
| 11           | 31.123 | 1.58  | Cyclohexasiloxane, dodecamethyl-                           |
| 12           | 31.392 | 0.11  | Ethyl 2-hydroxypropanoate                                  |
| 13           | 32.285 | 0.09  | 1-Hexanol                                                  |

|    |        |       |                                                            |
|----|--------|-------|------------------------------------------------------------|
| 14 | 33.709 | 0.04  | 1-Propanol, 3-ethoxy-                                      |
| 15 | 35.496 | 0.68  | Pyrazine, trimethyl-                                       |
| 16 | 36.932 | 0.09  | 2-Cyclohexen-1-ol                                          |
| 17 | 37.455 | 0.14  | Octanoic acid, ethyl ester                                 |
| 18 | 37.979 | 0.06  | Alpha.-Methyl-.alpha.-[4-methyl-3-pentenyl]oxiranemethanol |
| 19 | 38.176 | 0.10  | 2-Propen-1-ol, 2-methyl-                                   |
| 20 | 38.440 | 0.08  | 1-Octen-3-ol                                               |
| 21 | 38.822 | 0.48  | 2 -Furan- carboxaldehyde                                   |
| 22 | 39.157 | 0.07  | Pyrazine, 2,6-diethyl-                                     |
| 23 | 39.597 | 0.55  | Acetic acid                                                |
| 24 | 40.024 | 17.85 | Pyrazine, tetramethyl-                                     |
| 25 | 41.460 | 0.20  | (3E,5E)-Hepta-3,5-dien-2-one                               |
| 26 | 41.800 | 0.84  | Tetradecamethylcycloheptasiloxane                          |
| 27 | 42.431 | 0.51  | 2,3,5-Trimethyl-6-ethylpyrazine                            |
| 28 | 42.538 | 0.30  | Benzaldehyde                                               |
| 29 | 43.751 | 0.03  | Nonanoic acid, ethyl ester                                 |
| 30 | 43.874 | 0.26  | 2,3-Butanediol                                             |
| 31 | 44.374 | 0.22  | Linalool                                                   |
| 32 | 45.571 | 0.12  | 2-Furancarboxaldehyde, 5-methyl-                           |
| 33 | 46.082 | 0.45  | 2,3-Butanediol                                             |
| 34 | 46.892 | 0.13  | 6-Methyl-3,5-heptadien-2-one                               |
| 35 | 47.150 | 0.09  | Butane, 1-isothiocyanato-                                  |
| 36 | 47.546 | 0.09  | Cyclohexanol, 1,2-dimethyl-, cis-                          |
| 37 | 47.907 | 0.13  | Ethyl-5,5-diethoxy valerate                                |

|    |        |      |                                                            |
|----|--------|------|------------------------------------------------------------|
| 38 | 48.070 | 0.44 | 2-Allyl-2-methyl-1,3-cyclopentanedione                     |
| 39 | 48.468 | 0.12 | Propane-2-13C                                              |
| 40 | 48.650 | 0.15 | 1-Cyclohexene-1-propanol, .alpha.,Gamma,2,6,6-pentamethyl- |
| 41 | 49.696 | 0.25 | Benzeneacetaldehyde                                        |
| 42 | 49.799 | 0.11 | Propanoic acid, 2-(phenylmethoxy)-, methyl ester           |
| 43 | 50.039 | 0.29 | 1,3-Cyclohexadiene-1-carboxaldehyde, 2,6,6-trimethyl-      |
| 44 | 50.305 | 0.16 | Silanediol, dimethyl-                                      |
| 45 | 50.801 | 0.45 | 2-Furanmethanol                                            |
| 46 | 51.185 | 0.20 | Benzoic acid, ethyl ester                                  |
| 47 | 51.606 | 0.08 | Hexadecamethylcyclooctasiloxane                            |
| 48 | 51.799 | 0.60 | Butanedioic acid, diethyl ester                            |
| 49 | 53.127 | 0.10 | 3-Cyclohexene-1-methanol, .alpha.,.alpha.,4-trimethyl-     |
| 50 | 57.174 | 0.24 | Benzoic acid, 2-hydroxy-, methyl ester                     |
| 51 | 57.819 | 0.49 | Benzeneacetic acid, ethyl ester                            |
| 52 | 58.355 | 0.16 | Bicyclo[4.1.0]heptane, 1-methyl-                           |
| 53 | 59.430 | 0.26 | Acetic acid, 2-phenylethyl ester                           |
| 54 | 59.703 | 0.05 | Silanediol, dimethyl-                                      |
| 55 | 61.133 | 0.36 | Dodecanoic acid, ethyl ester                               |
| 56 | 61.611 | 0.12 | 2-Cyclopenten-1-one, 2,3,4-trimethyl-                      |
| 57 | 62.596 | 0.62 | Benzenemethanol                                            |
| 58 | 63.101 | 0.12 | Ethyl 3-phenylpropanoate                                   |
| 59 | 64.431 | 2.47 | Benzeneethanol                                             |
| 60 | 65.959 | 0.16 | Trans-.beta.-Ionone                                        |
| 61 | 67.360 | 0.22 | Acetylpyrrole                                              |

|              |        |       |                                                      |
|--------------|--------|-------|------------------------------------------------------|
| 62           | 68.993 | 0.13  | Phenol                                               |
| 63           | 70.235 | 0.28  | 4-Isopropyl-thiophenol                               |
| 64           | 70.925 | 1.01  | Butanedioic acid, hydroxy-, diethyl ester, (. +/-.)- |
| 65           | 71.481 | 1.47  | Tetradecanoic acid, ethyl ester                      |
| 66           | 73.653 | 0.06  | 1-Methyl-2-pyrrolecarboxaldehyde                     |
| 67           | 74.047 | 0.21  | Pentadecanoic acid, ethyl ester                      |
| 68           | 74.759 | 0.22  | Octadecanoic acid, ethyl ester                       |
| 69           | 76.159 | 0.22  | 2(1H)-Naphthalenone, octahydro-                      |
| 70           | 76.686 | 0.12  | Phenol, 2-methoxy-4-(2-propenyl)-                    |
| 71           | 77.937 | 0.34  | 2-Methoxy-4-vinylphenol                              |
| 72           | 78.777 | 0.05  | 12-Crown-4                                           |
| 73           | 79.287 | 0.37  | Hexadecanoic acid, methyl ester                      |
| 74           | 80.985 | 12.56 | Hexadecanoic acid, ethyl ester                       |
| 75           | 82.123 | 0.33  | Ethyl 9-hexadecenoate                                |
| 76           | 84.587 | 0.37  | Dihydroactinidiolide                                 |
| 77           | 89.101 | 1.86  | 1,4,7,10,13,16-Hexaoxacyclooctadecane                |
| 78           | 89.733 | 0.45  | Octadecanoic acid, 17-methyl-, methyl ester          |
| 79           | 90.524 | 3.51  | Ethyl (9Z)-9-octadecenoate                           |
| 80           | 90.908 | 1.24  | 5-Hydroxymethylfurfural                              |
| 81           | 92.429 | 10.54 | Linoleic acid ethyl ester                            |
| 82           | 94.472 | 1.68  | Ethyl 9,12,15-octadecatrienoate                      |
| <b>Go-16</b> |        |       |                                                      |
| 1            | 7.675  | 0.83  | Acetic acid ethyl ester                              |
| 2            | 7.956  | 0.16  | 1,4-Butanediamine                                    |

|    |        |       |                                                                     |
|----|--------|-------|---------------------------------------------------------------------|
| 3  | 9.110  | 18.67 | Ethanol                                                             |
| 4  | 15.98  | 0.25  | 1-Propanol, 2-methyl-                                               |
| 5  | 17.621 | 0.09  | Alpha.-Hydroperoxy diethyl ether                                    |
| 6  | 18.554 | 0.05  | Benzene, 1,4-dimethyl-                                              |
| 7  | 19.922 | 0.52  | Cyclopentasiloxane, decamethyl-                                     |
| 8  | 22.176 | 0.09  | Oxazole, trimethyl-                                                 |
| 9  | 22.812 | 0.25  | 1-Butanol, 2-methyl-                                                |
| 10 | 22.889 | 1.34  | 1-Butanol, 3-methyl-                                                |
| 11 | 24.261 | 0.09  | Furan, 2-pentyl-                                                    |
| 12 | 24.491 | 0.22  | Ethyl hexanoate                                                     |
| 13 | 26.009 | 0.14  | Ethanedioic acid, diethyl ester                                     |
| 14 | 27.553 | 0.20  | 2-Butanone, 3-hydroxy-                                              |
| 15 | 30.145 | 0.50  | Pyrazine, 2,5-dimethyl-                                             |
| 16 | 31.125 | 1.81  | Cyclohexasiloxane, dodecamethyl-                                    |
| 17 | 31.398 | 0.19  | Propanoic acid, 2-hydroxy-, ethyl ester, (S)-                       |
| 18 | 32.285 | 0.11  | 1-Hexanol                                                           |
| 19 | 35.496 | 1.43  | Pyrazine, trimethyl-                                                |
| 20 | 37.458 | 0.16  | Octanoic acid, ethyl ester                                          |
| 21 | 37.975 | 0.11  | Ethyl 2-(5-methyl-5-vinyltetrahydrofuran-2-yl)propan-2-yl carbonate |
| 22 | 38.175 | 0.15  | 2-Ethoxyethyl nonanoate                                             |
| 23 | 38.437 | 0.07  | 1-Octen-3-ol                                                        |
| 24 | 38.825 | 0.56  | 2-Furan-carboxaldehyde                                              |
| 25 | 39.159 | 0.21  | Pyrazine, 5-ethyl-2,3-dimethyl-                                     |
| 26 | 40.024 | 22.03 | 2,3,5,6 Tetramethyl pyrazine                                        |

|    |        |      |                                                            |
|----|--------|------|------------------------------------------------------------|
| 27 | 41.461 | 0.50 | Ethanone, 1-(2-furanyl)-                                   |
| 28 | 41.799 | 1.37 | Cycloheptasiloxane, tetradecamethyl-                       |
| 29 | 42.432 | 0.78 | 2,3,5-Trimethyl-6-ethylpyrazine                            |
| 30 | 42.541 | 0.39 | Benzaldehyde                                               |
| 31 | 43.744 | 0.05 | Nonanoic acid. ethyl ester                                 |
| 32 | 43.872 | 0.39 | 1,3-Butanediol                                             |
| 33 | 44.079 | 0.12 | 2-Pentanol, 4-methyl-                                      |
| 34 | 44.376 | 0.52 | L-Linalool                                                 |
| 35 | 45.580 | 0.09 | 1,3-Cyclohexadien-1-yl methyl ether                        |
| 36 | 46.082 | 0.41 | 1,3-Butanediol                                             |
| 37 | 46.895 | 0.30 | 6-Methyl-3, 5-heptadiene-2-one                             |
| 38 | 47.145 | 0.09 | Pentane, 2,2'-oxybis-                                      |
| 39 | 47.540 | 0.10 | 3-Acetyl-2,6-heptanedione                                  |
| 40 | 47.729 | 0.12 | 6-Nitrohexan-2,3-dione                                     |
| 41 | 47.861 | 0.13 | Propanoic acid, 2-methyl-                                  |
| 42 | 48.068 | 0.18 | Hydrazine, 1,1-diethyl-                                    |
| 42 | 48.649 | 0.10 | 1-Cyclohexene-1-propanol, .alpha.,Gamma,2,6,6-pentamethyl- |
| 43 | 49.657 | 0.44 | Benzeneacetaldehyde                                        |
| 44 | 49.803 | 0.20 | Phenyl acetaldehyde                                        |
| 45 | 50.039 | 0.49 | 1,3-Cyclohexadiene-1-carboxaldehyde, 2,6,6-trimethyl-      |
| 46 | 50.305 | 0.26 | Silanediol, dimethyl-                                      |
| 47 | 50.803 | 0.78 | 2-Furanmethanol                                            |
| 48 | 51.192 | 0.16 | 2-(N-Methylamido)furan                                     |
| 49 | 51.604 | 0.46 | Cyclooctasiloxane, hexadecamethyl-                         |

|    |        |       |                                              |
|----|--------|-------|----------------------------------------------|
| 50 | 51.800 | 0.16  | Butanedioic acid, diethyl ester              |
| 51 | 53.139 | 0.02  | 2-(4-Methyl-3-cyclohexen-1-yl)-2-propanol    |
| 52 | 57.818 | 0.44  | Benzeneacetic acid, ethyl ester              |
| 53 | 59.429 | 0.19  | B-Phenylethyl acetate                        |
| 54 | 59.726 | 0.06  | Silanediol, dimethyl-                        |
| 55 | 60.347 | 0.05  | Cyclononasiloxane, octadecamethyl-           |
| 56 | 61.134 | 0.31  | Dodecanoic acid, ethyl ester                 |
| 57 | 61.618 | 0.15  | Gamma, gamma-dimethylallenyl-ethynyl sulfide |
| 58 | 62.589 | 0.19  | Benzyl alcohol                               |
| 59 | 64.433 | 2.92  | Benzeneethanol                               |
| 60 | 65.961 | 0.12  | Trans-beta-ionone                            |
| 61 | 67.357 | 0.91  | Ethanone, 1-(1H-pyrrol-2-yl)-                |
| 62 | 68.991 | 0.26  | Phenol                                       |
| 63 | 70.227 | 0.19  | 2(3H)-Furanone, dihydro-5-pentyl-            |
| 64 | 71.484 | 1.64  | Tetradecanoic acid, ethyl ester              |
| 65 | 73.653 | 0.10  | 1H-Pyrrole-2-carboxaldehyde, 5-methyl-       |
| 66 | 74.046 | 0.13  | Pentadecanoic acid, ethyl ester              |
| 67 | 74.764 | 0.20  | Ethyl 13-methyl-tetradecanoate               |
| 68 | 76.346 | 0.11  | 15-Crown-5                                   |
| 69 | 77.949 | 0.28  | 2-Methoxy-4-vinylphenol                      |
| 70 | 79.285 | 0.51  | Hexadecanoic acid, methyl ester              |
| 71 | 80.984 | 13.60 | Hexadecanoic acid, ethyl ester               |
| 72 | 82.122 | 0.38  | Ethyl 9-hexadecenoate                        |
| 73 | 84.588 | 0.33  | Dihydroactinidiolide                         |



|              |        |       |                                                    |
|--------------|--------|-------|----------------------------------------------------|
| 74           | 89.730 | 0.44  | Octadecanoic acid, ethyl ester                     |
| 75           | 90.524 | 3.68  | Ethyl (9Z)-9-Octadecenoate                         |
| 76           | 90.885 | 0.65  | 5-Hydroxymethylfurfural                            |
| 77           | 91.045 | 1.62  | 1,4,7,10,13,16-Hexaoxacyclooctadecane              |
| 78           | 92.427 | 10.07 | Linoleic acid ethyl ester                          |
| 79           | 94.468 | 1.71  | Ethyl 9,12,15-octadecatrienoate                    |
| <b>Go-17</b> |        |       |                                                    |
| 1            | 7.675  | 0.91  | Acetic acid, ethyl ester                           |
| 2            | 7.955  | 0.16  | Hydroxyacetic acid, hydrazide                      |
| 3            | 9.132  | 46.03 | Ethanol                                            |
| 4            | 16.058 | 0.34  | 1-Propanol, 2-methyl-                              |
| 5            | 17.599 | 0.09  | 2-Pentanol                                         |
| 6            | 19.920 | 0.17  | 6-Aza-5,7,12,14-tetrathiapentacene                 |
| 7            | 22.906 | 1.92  | 1-Butanol, 3-methyl-                               |
| 8            | 24.249 | 0.06  | Furan, 2-pentyl-                                   |
| 9            | 24.486 | 0.18  | Ethyl hexanoate                                    |
| 10           | 27.564 | 0.05  | 2-Butanone, 3-hydroxy-                             |
| 11           | 29.765 | 0.04  | Acetic acid, 2-cyano-, 2-(ethoxycarbonyl)hydrazide |
| 12           | 30.148 | 0.13  | Dimethyl pyrazine                                  |
| 13           | 31.124 | 0.95  | Cyclohexasiloxane, dodecamethyl-                   |
| 14           | 31.401 | 0.05  | 2-Pentanol                                         |
| 15           | 32.286 | 0.07  | 1-Hexanol                                          |
| 16           | 32.472 | 0.05  | Heptacosane                                        |
| 17           | 32.754 | 0.05  | 2-[2-(Methoxy)ethyl]-4(5)-methylimidazole          |

|    |        |      |                                                       |
|----|--------|------|-------------------------------------------------------|
| 18 | 35.262 | 0.05 | Ethanol, 2-(hexadecyloxy)-                            |
| 19 | 35.496 | 0.33 | Pyrazine, trimethyl-                                  |
| 20 | 37.453 | 0.24 | Octanoic acid, ethyl ester                            |
| 21 | 38.441 | 0.06 | 1-Octen-3-ol                                          |
| 22 | 38.822 | 0.28 | 3-Furaldehyde                                         |
| 23 | 40.013 | 5.12 | 2,3,5,6 Tetramethyl pyrazine                          |
| 24 | 41.458 | 0.16 | Ethanone, 1-(2-furanyl)-                              |
| 25 | 41.793 | 1.47 | Cycloheptasiloxane, tetradecamethyl-                  |
| 26 | 42.429 | 0.13 | 1,3-Benzodioxole-5-carboxaldehyde                     |
| 27 | 42.543 | 0.21 | Benzaldehyde                                          |
| 28 | 43.747 | 0.11 | Nonanoic acid, ethyl ester                            |
| 29 | 43.886 | 0.20 | 2,3-Butanediol                                        |
| 30 | 44.378 | 0.16 | L-Linalool                                            |
| 31 | 45.407 | 0.06 | Ethyl 3-(methylsulfanyl)propanoate                    |
| 32 | 46.082 | 0.40 | 1,3-Butanediol                                        |
| 33 | 46.897 | 0.08 | 6-Methyl-3,5-heptadiene-2-one                         |
| 34 | 47.024 | 0.07 | Undecanoic acid, ethyl ester                          |
| 35 | 47.537 | 0.04 | Cyclohexanol, 1,2-dimethyl-, cis-                     |
| 36 | 47.704 | 0.26 | Propanoic acid, 2-methyl-                             |
| 37 | 48.064 | 0.33 | 8-Methyl-6-nonenoic acid                              |
| 38 | 49.636 | 0.20 | Benzeneacetaldehyde                                   |
| 39 | 49.807 | 0.19 | Decanoic acid, ethyl ester                            |
| 40 | 50.033 | 0.22 | 1,3-Cyclohexadiene-1-carboxaldehyde, 2,6,6-trimethyl- |
| 41 | 50.302 | 0.18 | Silanediol, dimethyl-                                 |

|    |        |       |                                                       |
|----|--------|-------|-------------------------------------------------------|
| 42 | 50.802 | 0.34  | 2-Furanmethanol                                       |
| 43 | 51.196 | 0.08  | Benzoic acid, ethyl ester                             |
| 44 | 51.599 | 0.48  | Cyclooctasiloxane, hexadecamethyl-                    |
| 45 | 51.798 | 0.14  | Butanedioic acid, diethyl ester                       |
| 46 | 53.133 | 0.10  | 2-(4-Methyl-3-cyclohexen-1-yl)-2-propanol             |
| 47 | 57.174 | 0.23  | Methyl salicylate                                     |
| 48 | 57.819 | 0.48  | Benzeneacetic acid, ethyl ester                       |
| 49 | 59.428 | 0.46  | Acetic acid, 2-phenylethyl ester                      |
| 50 | 59.712 | 0.05  | Silanediol, dimethyl-                                 |
| 51 | 60.350 | 0.04  | Cyclononasiloxane, octadecamethyl-                    |
| 52 | 61.131 | 0.48  | Dodecanoic acid, ethyl ester                          |
| 53 | 62.593 | 0.10  | Benzenemethanol                                       |
| 54 | 64.434 | 4.88  | Benzeneethanol                                        |
| 55 | 65.955 | 0.09  | 3-Buten-2-one, 4-(2,6,6-trimethyl-1-cyclohexen-1-yl)- |
| 56 | 67.354 | 0.32  | Ethanone, 1-(1H-pyrrol-2-yl)-                         |
| 57 | 68.994 | 0.09  | Phenol                                                |
| 58 | 69.111 | 0.13  | Octadecanoic acid, 17-methyl-, methyl ester           |
| 59 | 70.223 | 0.14  | 2(3H)-Furanone, dihydro-5-pentyl-                     |
| 60 | 71.482 | 1.56  | Tetradecanoic acid, ethyl ester                       |
| 61 | 74.046 | 0.34  | Pentadecanoic acid, ethyl ester                       |
| 62 | 74.758 | 0.27  | Methyl 2,12-dimethyltetradecanoate                    |
| 63 | 77.943 | 0.35  | 4-Vinyl-2-methoxy-phenol                              |
| 64 | 79.283 | 0.33  | Pentadecanoic acid, 14-methyl-, methyl ester          |
| 65 | 80.987 | 11.97 | Hexadecanoic acid, ethyl ester                        |

|              |        |       |                                                            |
|--------------|--------|-------|------------------------------------------------------------|
| 66           | 82.125 | 0.28  | Ethyl 9-hexadecenoate                                      |
| 67           | 84.586 | 0.24  | 2(4H)-Benzofuranone, 5,6,7,7a-tetrahydro-4,4,7a-trimethyl- |
| 68           | 89.729 | 0.23  | Octadecanoic acid, 17-methyl-, methyl ester                |
| 69           | 90.518 | 2.06  | Ethyl oleate                                               |
| 70           | 90.860 | 1.73  | 1,4,7,10,13,16-Hexaoxacyclooctadecane                      |
| 71           | 92.428 | 7.92  | Linoleic acid ethyl ester                                  |
| 72           | 94.471 | 2.27  | Ethyl 9,12,15-octadecatrienoate                            |
| <b>Go-18</b> |        |       |                                                            |
| 1            | 6.459  | 0.17  | Acetic acid, methyl ester                                  |
| 2            | 7.675  | 2.68  | Ethyl acetate                                              |
| 3            | 7.956  | 0.36  | Acetic acid, hydroxy-                                      |
| 4            | 8.366  | 0.11  | Butanal, 2-methyl-                                         |
| 5            | 8.487  | 0.18  | Butanal, 3-methyl-                                         |
| 6            | 9.116  | 18.95 | Ethanol                                                    |
| 7            | 15.983 | 0.05  | Butanoic acid, 3-hydroxy-, methyl ester                    |
| 8            | 17.613 | 0.08  | 1- Butanol, 3-methyl-, acetate                             |
| 9            | 19.922 | 0.16  | Cyclopentasiloxane, decamethyl-                            |
| 10           | 22.806 | 0.05  | 2-butoxy-ethanol                                           |
| 11           | 22.892 | 0.12  | 1-Butanol, 3-methyl-                                       |
| 12           | 24.260 | 0.03  | Furan, 2-pentyl-                                           |
| 13           | 24.490 | 0.09  | Ethyl hexanoate                                            |
| 14           | 27.563 | 0.03  | 2-Butanone, 3-hydroxy-                                     |
| 15           | 27.954 | 0.05  | Octanal                                                    |
| 16           | 30.151 | 0.04  | (E)-2,3-Epoxy-1-(methoxymethoxy)octane                     |

|    |        |      |                                                            |
|----|--------|------|------------------------------------------------------------|
| 17 | 31.124 | 0.84 | Cyclohexasiloxane, dodecamethyl-                           |
| 18 | 31.400 | 0.13 | Ethyl 2-hydroxypropanoate                                  |
| 19 | 32.471 | 0.06 | Hexadecane, 3-methyl-                                      |
| 20 | 36.944 | 0.05 | 6-Methoxy-2,2-dimethyl-3-chromene                          |
| 21 | 37.453 | 0.22 | Octanoic acid, ethyl ester                                 |
| 22 | 37.973 | 0.03 | Alpha.-Methyl-.alpha.-[4-methyl-3-pentenyl]oxiranemethanol |
| 23 | 38.093 | 0.11 | 1-Pentadecanol                                             |
| 24 | 38.328 | 0.05 | Propanal, 3-(methylthio)-                                  |
| 25 | 38.826 | 5.69 | 2-Furan-carboxaldehyde                                     |
| 26 | 39.682 | 0.29 | Acetic acid                                                |
| 27 | 40.008 | 0.49 | Pyrazine, tetramethyl-                                     |
| 28 | 41.352 | 0.07 | Decanal                                                    |
| 29 | 41.460 | 0.12 | (3E,5E)-Hepta-3,5-dien-2-one                               |
| 30 | 41.792 | 1.30 | Tetradecamethyl-cyclo-hepta-siloxane                       |
| 31 | 42.538 | 0.83 | Benzaldehyde                                               |
| 32 | 43.750 | 0.06 | Nonanoic acid, ethyl ester                                 |
| 33 | 43.877 | 0.06 | 2,3-Butanediol                                             |
| 34 | 44.374 | 0.30 | L-Linalool                                                 |
| 35 | 45.568 | 0.31 | 2-Furancarboxaldehyde, 5-methyl-                           |
| 36 | 46.078 | 0.24 | 1,3-Butanediol                                             |
| 37 | 46.892 | 0.09 | 6-Methyl-3,5-heptadiene-2-one                              |
| 38 | 47.019 | 0.08 | 10-Bromodecanoic acid, ethyl ester                         |
| 39 | 48.064 | 0.18 | Neopentylidenecyclohexane                                  |
| 40 | 48.548 | 0.17 | Benzoic acid, methyl ester                                 |

|    |        |      |                                                                        |
|----|--------|------|------------------------------------------------------------------------|
| 41 | 49.643 | 0.94 | Benzeneacetaldehyde                                                    |
| 42 | 50.031 | 0.36 | Benzene, 1,1'-[1,2-ethanediylbis(oxymethylene)]bis-                    |
| 43 | 50.293 | 0.30 | Silanediol, dimethyl-                                                  |
| 44 | 50.800 | 0.63 | 2-Furanmethanol                                                        |
| 45 | 51.186 | 0.28 | Benzoic acid, ethyl ester                                              |
| 46 | 51.599 | 0.39 | Cyclooctasiloxane, hexadecamethyl-                                     |
| 47 | 51.802 | 0.06 | Succinic acid, ethyl 3-(2-methoxyethyl)nonyl ester                     |
| 48 | 52.621 | 0.06 | 4-Ketoisophorone                                                       |
| 49 | 52.939 | 0.04 | cis-(-)-2,4a,5,6,9a-Hexahydro-3,5,5,9-tetramethyl(1H)benzocycloheptene |
| 50 | 53.129 | 0.10 | 3-Cyclohexene-1-methanol, .alpha.,.alpha.,4-trimethyl-                 |
| 51 | 57.170 | 0.88 | Methyl salicylate                                                      |
| 52 | 57.821 | 0.10 | Benzeneacetic acid, ethyl ester                                        |
| 53 | 58.913 | 0.08 | Dodecanoic acid, methyl ester                                          |
| 54 | 59.426 | 0.11 | B-Phenylethyl acetate                                                  |
| 55 | 59.703 | 0.05 | Silanediol, dimethyl-                                                  |
| 56 | 60.352 | 0.03 | Cyclononasiloxane, octadecamethyl-                                     |
| 57 | 61.134 | 0.83 | Dodecanoic acid, ethyl ester                                           |
| 58 | 61.619 | 0.14 | Phenol, 2-methoxy-                                                     |
| 59 | 64.431 | 0.67 | Benzeneethanol                                                         |
| 60 | 65.311 | 0.14 | Benzeneacetaldehyde, .alpha.-ethylidene-                               |
| 61 | 67.353 | 0.15 | Ethanone, 1-(1H-pyrrol-2-yl)-                                          |
| 62 | 69.544 | 0.30 | Myristic acid, methyl ester                                            |
| 63 | 69.926 | 0.16 | 1H-Pyrrole-2-carboxaldehyde                                            |
| 64 | 70.223 | 0.10 | (1E)-1-(Ethylsulfanyl)-1,3-butadiene                                   |

|              |        |       |                                                            |
|--------------|--------|-------|------------------------------------------------------------|
| 65           | 70.412 | 0.14  | Pentadecanal                                               |
| 66           | 71.481 | 2.20  | Tetradecanoic acid, ethyl ester                            |
| 67           | 72.449 | 0.11  | 5-Methyl-2-phenyl-2-hexenal                                |
| 68           | 74.053 | 0.14  | Ethyl 13-methyl-tetradecanoate                             |
| 69           | 76.332 | 0.07  | Pentadecanoic acid, ethyl ester                            |
| 70           | 77.062 | 0.05  | <i>p</i> -Ethyl-phenol                                     |
| 71           | 77.943 | 0.42  | 2-Methoxy-4-vinylphenol                                    |
| 72           | 80.471 | 0.08  | 3-Pentanol, 3-ethyl-2-methyl-                              |
| 73           | 80.991 | 14.37 | Hexadecanoic acid, methyl ester                            |
| 74           | 82.123 | 0.70  | Ethyl 9-hexadecenoate                                      |
| 75           | 84.589 | 0.08  | 2(4H)-Benzofuranone, 5,6,7,7a-tetrahydro-4,4,7a-trimethyl- |
| 76           | 86.489 | 0.21  | 4-Vinyl - phenol                                           |
| 77           | 88.243 | 2.9   | 1,4,7,10,13,16-Hexaoxacyclooctacane                        |
| 78           | 89.088 | 1.13  | 9-Octadecenoic acid (Z)-, methyl ester                     |
| 79           | 89.732 | 0.39  | Octadecanoic acid, ethyl ester                             |
| 80           | 90.529 | 6.44  | Ethyl (9Z)-9-Octadecenoate                                 |
| 81           | 90.866 | 0.56  | (E)-9-Octadecenoic acid ethyl ester                        |
| 82           | 91.050 | 3.83  | 9,12-Octadecadienoic acid (Z,Z)-, methyl ester             |
| 83           | 92.449 | 21.27 | Linoleic acid ethyl ester                                  |
| 84           | 94.473 | 2.12  | Ethyl 9,12,15-octadecatrienoate                            |
| 85           | 95.143 | 1.02  | Octaethylene glycol monododecyl ether                      |
| <b>Go-19</b> |        |       |                                                            |
| 1            | 7.675  | 2.32  | Acetic acid ethyl ester                                    |
| 2            | 8.486  | 0.12  | Butanal, 3-methyl-                                         |

|    |        |       |                                               |
|----|--------|-------|-----------------------------------------------|
| 3  | 9.105  | 10.10 | Ethanol                                       |
| 4  | 15.311 | 0.09  | Hexanal                                       |
| 5  | 15.906 | 0.08  | Butanoic acid, 3-hydroxy-, methyl ester       |
| 6  | 19.926 | 0.19  | Cyclopentasiloxane, decamethyl-               |
| 7  | 22.178 | 0.12  | Oxazole, trimethyl-                           |
| 8  | 22.801 | 0.11  | 1-Butanol, 2-methyl-                          |
| 9  | 22.877 | 0.40  | 1-Butanol, 3-methyl-                          |
| 10 | 27.539 | 0.81  | Acetoin                                       |
| 11 | 27.956 | 0.06  | Octanal                                       |
| 12 | 29.773 | 0.06  | 1-Pentanol, 4-methyl-                         |
| 13 | 30.138 | 0.42  | Pyrazine, 2,5-dimethyl-                       |
| 14 | 31.126 | 1.27  | Cyclohexasiloxane, dodecamethyl-              |
| 15 | 31.392 | 0.62  | Propanoic acid, 2-hydroxy-, ethyl ester, (S)- |
| 16 | 31.677 | 0.09  | Pyrazine, 2,3-dimethyl-                       |
| 17 | 32.286 | 0.08  | 1-Hexanol                                     |
| 18 | 32.488 | 0.22  | Tridecane, 2-methyl-                          |
| 19 | 34.081 | 0.11  | 4-Methylpentyl 2-methylbutanoate              |
| 20 | 35.273 | 0.21  | Tetradecane                                   |
| 21 | 35.496 | 2.21  | Pyrazine, trimethyl-                          |
| 22 | 36.934 | 0.07  | Trans-2-tridecenal                            |
| 23 | 37.462 | 0.06  | Octanoic acid, ethyl ester                    |
| 24 | 38.100 | 0.10  | Pyrazine, 3-ethyl-2,5-dimethyl-               |
| 25 | 38.477 | 0.05  | 1-Octen-3-ol                                  |
| 26 | 38.821 | 0.24  | 2-Furan-carboxaldehyde                        |



|    |        |       |                                                                   |
|----|--------|-------|-------------------------------------------------------------------|
| 27 | 38.948 | 1.88  | Acetic acid                                                       |
| 28 | 39.160 | 1.75  | Pyrazine, 3-ethyl-2,5-dimethyl-                                   |
| 29 | 40.054 | 54.31 | 2,3,5,6 Tetramethyl pyrazine                                      |
| 30 | 40.947 | 0.66  | 1-Hexanol, 2-ethyl-                                               |
| 31 | 41.458 | 0.14  | Ethanone, 1-(2-furanyl)-                                          |
| 32 | 41.803 | 0.51  | Tetradecamethyl-cyclo-hepta-siloxane                              |
| 33 | 42.433 | 2.74  | 2,3,5-Trimethyl-6-ethylpyrazine                                   |
| 34 | 42.535 | 0.56  | Benzaldehyde                                                      |
| 35 | 43.749 | 0.07  | Nonanoic acid, ethyl ester                                        |
| 36 | 43.871 | 1.44  | 2,3-Butanediol                                                    |
| 37 | 44.233 | 0.17  | 1-Methyl-7,7-dimethyl-2,4-diazabicyclo[4.2.0]octa-1,5-diene-3-one |
| 38 | 45.190 | 0.20  | Acetic acid, methoxy-, ethyl ester                                |
| 39 | 45.570 | 0.09  | 2-Furancarboxaldehyde, 5-methyl-                                  |
| 40 | 45.720 | 0.20  | 1,3-Dihydrobenzimidazol-2-one                                     |
| 41 | 46.075 | 0.92  | 2,3-Butanediol                                                    |
| 42 | 46.546 | 0.06  | 2,4-Cyclopentadiene-1-carboxaldehyde, 1,2,3,4,5- pentamethyl-     |
| 43 | 46.895 | 0.19  | 6-Methyl-3,5-heptadiene-2-one                                     |
| 44 | 47.028 | 0.11  | Hexadecanoic acid, ethyl ester                                    |
| 45 | 47.554 | 0.37  | Cyclohexanol, 2,6-dimethyl-                                       |
| 46 | 47.728 | 0.12  | Propanoic acid, 2-methyl-                                         |
| 47 | 47.915 | 0.22  | 1-Butanol, 4-(1-methylethoxy)-                                    |
| 48 | 48.067 | 0.51  | Neopentylidenecyclohexane                                         |
| 49 | 48.535 | 0.11  | 1-Benzyl-1-methyl-3-phenylurea                                    |
| 50 | 48.636 | 0.20  | 1-Cyclohexene-1-carboxaldehyde, 2,6,6-trimethyl-                  |

|    |        |      |                                                                                                                             |
|----|--------|------|-----------------------------------------------------------------------------------------------------------------------------|
| 51 | 49.626 | 0.54 | Benzeneacetaldehyde                                                                                                         |
| 52 | 50.021 | 0.49 | 1H-Cycloprop[e]azulene, 1a,2,3,5,6,7,7a,7b-octahydro-1,1,4,7-tetramethyl-, [1aR-(1a.alpha.,7.alpha.,7a .beta.,7b.alpha.)] - |
| 53 | 50.795 | 0.11 | 2-Furanmethanol                                                                                                             |
| 54 | 51.798 | 0.12 | Butanedioic acid, diethyl ester                                                                                             |
| 55 | 52.940 | 1.32 | (E,Z)-.Alpha.-farnesene                                                                                                     |
| 56 | 53.112 | 0.20 | Butanoic acid, 2-methyl-                                                                                                    |
| 57 | 57.819 | 0.14 | 1-(3,5-Dimethyl-2-pyrazinyl)-1-ethanone                                                                                     |
| 58 | 58.914 | 0.28 | Dimethyl-2,3-dihydro-6,7-5H-cyclopenta[b]pyrazine                                                                           |
| 59 | 59.427 | 0.13 | B-Phenylethyl acetate                                                                                                       |
| 60 | 59.720 | 0.07 | Silanediol, dimethyl-                                                                                                       |
| 61 | 61.610 | 0.24 | Ethanone, 1-(1-cyclohexen-1-yl)-                                                                                            |
| 62 | 64.430 | 1.71 | Benzenemethanol                                                                                                             |
| 63 | 65.959 | 0.47 | Trans-.beta.-ionone                                                                                                         |
| 64 | 67.355 | 0.58 | Ethanone, 1-(1H-pyrrol-2-yl)-                                                                                               |
| 65 | 68.566 | 0.12 | 3-Buten-2-ol, 4-(2,6,6-trimethyl-1-cyclohexen-1-yl)-                                                                        |
| 66 | 68.990 | 0.15 | Phenol                                                                                                                      |
| 67 | 70.959 | 0.29 | 1,6,10-Dodecatrien-3-ol, 3,7,11-trimethyl-                                                                                  |
| 68 | 71.480 | 0.11 | Tetradecanoic acid, ethyl ester                                                                                             |
| 69 | 72.451 | 0.10 | 15-Crown-5                                                                                                                  |
| 70 | 73.650 | 0.08 | 3-Pyridinemethanol                                                                                                          |
| 71 | 76.673 | 0.08 | 4-Methoxy-3-methylaniline                                                                                                   |
| 72 | 77.060 | 0.31 | Phenol, 4-ethyl-                                                                                                            |
| 73 | 77.939 | 1.36 | 2-Methoxy-4-vinylphenol                                                                                                     |
| 74 | 78.112 | 0.05 | 2-Methyl-benzoic acid                                                                                                       |

|              |        |       |                                         |
|--------------|--------|-------|-----------------------------------------|
| 75           | 80.982 | 0.56  | Hexadecanoic acid, ethyl ester          |
| 76           | 84.586 | 0.76  | Dihydroactinidiolide                    |
| 77           | 86.486 | 0.36  | Silanol, trimethyl-, nitrate            |
| 78           | 90.526 | 1.52  | 1,4,7,10,13,16-Hexaoxacyclooctadecane   |
| <b>Go-20</b> |        |       |                                         |
| 1            | 5.436  | 0.14  | Methane, thiobis-                       |
| 2            | 6.462  | 0.20  | Acetic acid, methyl ester               |
| 3            | 7.676  | 1.73  | Ethyl acetate                           |
| 4            | 7.953  | 0.44  | Hydroxyacetic acid, hydrazide           |
| 5            | 8.367  | 0.12  | 6,8-Dioxabicyclo(3.2.1)octan-3L-ol-3-D1 |
| 6            | 8.487  | 0.26  | Butanal, 3-methyl-                      |
| 7            | 9.107  | 17.72 | Ethanol                                 |
| 8            | 15.316 | 0.20  | Hexanal                                 |
| 9            | 15.899 | 0.21  | 1-Propanol, 2-methyl-                   |
| 10           | 18.571 | 0.12  | 1,4-Dimethylbenzene                     |
| 11           | 19.929 | 0.72  | Cyclopentasiloxane, decamethyl-         |
| 12           | 22.798 | 0.42  | 1-Butanol, 2-methyl-                    |
| 13           | 22.877 | 0.40  | 1-Butanol, 3-methyl-                    |
| 14           | 24.260 | 0.13  | Furan, 2-pentyl-                        |
| 15           | 24.494 | 0.56  | Hexanoic acid, ethyl ester              |
| 16           | 27.538 | 0.15  | 2-Butanone, 3-hydroxy-                  |
| 17           | 27.953 | 0.10  | Octanal                                 |
| 18           | 28.657 | 0.07  | 7-Oxabicyclo[4.1.0]heptane, 1-methyl-   |
| 19           | 29.772 | 0.11  | 1-Pentanol, 4-methyl-                   |

|    |        |      |                                                                     |
|----|--------|------|---------------------------------------------------------------------|
| 20 | 30.143 | 0.19 | Pyrazine, 2,5-dimethyl-                                             |
| 21 | 30.978 | 0.13 | Ethyl heptanoate                                                    |
| 22 | 31.123 | 2.26 | Cyclohexasiloxane, dodecamethyl-                                    |
| 23 | 31.383 | 0.10 | 2,3-Butanediol                                                      |
| 24 | 32.285 | 0.13 | 1,5-Pentanediamine                                                  |
| 25 | 32.757 | 0.16 | 4-Pyridinol                                                         |
| 26 | 34.198 | 0.11 | 1,2-Cyclohexanediol                                                 |
| 27 | 35.270 | 0.09 | Nonane                                                              |
| 28 | 35.490 | 0.56 | Pyrazine, trimethyl-                                                |
| 29 | 36.936 | 0.12 | E-2-Octenal                                                         |
| 30 | 37.453 | 0.32 | Octanoic acid, ethyl ester                                          |
| 31 | 37.975 | 0.10 | Ethyl 2-(5-methyl-5-vinyltetrahydrofuran-2-yl)propan-2-yl carbonate |
| 32 | 38.432 | 0.23 | 1-Octen-3-ol                                                        |
| 33 | 38.821 | 4.93 | 2-Furan-carboxaldehyde                                              |
| 34 | 39.153 | 0.28 | 2,3-Dimethyl-5-ethylpyrazine                                        |
| 35 | 40.010 | 9.22 | 2,3,5,6 Tetramethyl pyrazine                                        |
| 36 | 40.939 | 0.53 | 1-Hexanol, 2-ethyl-                                                 |
| 37 | 41.454 | 1.00 | Ethanone, 1-(2-furanyl)-                                            |
| 38 | 41.799 | 1.72 | Tetradecamethylcycloheptasiloxane                                   |
| 39 | 42.430 | 0.56 | 2,3,5-Trimethyl -6-ethylpyrazine                                    |
| 40 | 42.538 | 0.36 | Benzaldehyde                                                        |
| 41 | 43.745 | 0.14 | Nonanoic acid, ethyl ester                                          |
| 42 | 44.374 | 0.51 | Cyclohexene, 1- methyl-4-(1-methyl ethylidene)-                     |
| 43 | 45.568 | 0.78 | 2-Furancarboxaldehyde, 5-methyl-                                    |

|    |        |      |                                                                                   |
|----|--------|------|-----------------------------------------------------------------------------------|
| 44 | 45.795 | 0.28 | 1-Propanone, 1-(2-furanyl)-                                                       |
| 45 | 46.150 | 0.41 | Dodecane, 5-methyl-                                                               |
| 46 | 46.891 | 0.57 | 6-Methyl-3,5-heptadiene-2-one                                                     |
| 47 | 47.538 | 0.25 | Cyclohexanol, 2,6-dimethyl-                                                       |
| 48 | 48.074 | 0.47 | Bicyclo[3.1.0]hexan-3-one, 1-acetyl-4-methyl-, [1R-(1.alpha.,4.alpha.,5.alpha.)]- |
| 49 | 48.555 | 0.15 | Benzaldehyde, 4-methyl-                                                           |
| 50 | 48.634 | 0.27 | 1-Cyclohexene-1-carboxaldehyde, 2,6,6-trimethyl-                                  |
| 51 | 49.652 | 0.33 | Benzeneacetaldehyde                                                               |
| 52 | 50.034 | 0.51 | 1,3-Cyclohexadiene-1-carboxaldehyde, 2,6,6-trimethyl-                             |
| 53 | 50.798 | 1.53 | 2-Furanmethanol                                                                   |
| 54 | 51.193 | 0.30 | Thiophene, 2-methyl-5-(1-methylpropyl)-                                           |
| 55 | 51.606 | 0.26 | Cyclooctasiloxane, hexadecamethyl-                                                |
| 56 | 51.814 | 0.15 | Butanedioic acid, diethyl ester                                                   |
| 57 | 53.133 | 0.27 | 3-Cyclohexene-1-methanol, .alpha.,.alpha.,4-trimethyl-                            |
| 58 | 57.170 | 3.28 | Methyl salicylate                                                                 |
| 59 | 57.818 | 0.56 | Benzeneacetic acid, ethyl ester                                                   |
| 60 | 59.690 | 0.08 | Silanediol, dimethyl-                                                             |
| 61 | 60.947 | 0.09 | 2-Pentenenitrile, 2-(1-methylethenyl)-, (E)-                                      |
| 62 | 61.130 | 0.68 | Dodecanoic acid, ethyl ester                                                      |
| 63 | 61.618 | 0.28 | Phenol, 2-methoxy-                                                                |
| 64 | 62.589 | 0.23 | Benzyl alcohol                                                                    |
| 65 | 64.429 | 0.23 | Phenylethyl Alcohol                                                               |
| 66 | 65.310 | 0.27 | Benzeneacetaldehyde, .alpha.-ethylidene-                                          |
| 67 | 65.959 | 0.19 | 3-Buten-2-one, 4-(2,6,6-trimethyl-1-cyclohexen-1-yl)-                             |

|              |        |       |                                               |
|--------------|--------|-------|-----------------------------------------------|
| 68           | 67.354 | 1.51  | Ethanone, 1-(1H-pyrrol-2-yl)-                 |
| 69           | 67.642 | 3.66  | Maltol                                        |
| 70           | 69.547 | 0.26  | Myristic acid, methyl ester                   |
| 71           | 71.481 | 2.26  | Tetradecanoic acid, ethyl ester               |
| 72           | 73.658 | 0.11  | 3-Pyridinemethanol                            |
| 73           | 74.043 | 0.11  | Ethyl 13-methyl-tetradecanoate                |
| 74           | 75.235 | 0.12  | (E)-1-(3-Pyridyl)oct-3-en-1-yne               |
| 75           | 76.339 | 0.14  | Butane, 1,2,3,4-tetramethoxy-                 |
| 76           | 77.937 | 0.27  | 2-Methoxy-4-vinylphenol                       |
| 77           | 79.282 | 1.79  | Hexadecanoic acid, methyl ester               |
| 78           | 80.981 | 13.60 | Hexadecanoic acid, ethyl ester                |
| 79           | 82.115 | 0.31  | Octaethylene glycol monododecyl ether         |
| 80           | 84.577 | 0.36  | Dihydroactinidiolide                          |
| 81           | 86.481 | 0.32  | 4-Vinylphenol                                 |
| 82           | 90.521 | 1.88  | Ethyl (9Z)-9-octadecenoate                    |
| 83           | 90.905 | 0.91  | 5-Hydroxymethylfurfural                       |
| 84           | 91.044 | 1.23  | 9,12-Octadecadienoic acid (Z,Z)-,methyl ester |
| 85           | 92.423 | 7.70  | Linoleic acid ethyl ester                     |
| 86           | 94.469 | 3.44  | 1,4,7,10,13,16- Hexaoxacyclooctadecane        |
| <b>Go-21</b> |        |       |                                               |
| 1            | 7.667  | 0.50  | Acetic acid ethyl ester                       |
| 2            | 8.477  | 0.48  | Butanal, 3-methyl-                            |
| 3            | 9.100  | 36.94 | Ethanol                                       |
| 4            | 15.229 | 1.04  | Hexanal                                       |

|    |        |      |                                              |
|----|--------|------|----------------------------------------------|
| 5  | 17.626 | 0.63 | Benzene, ethyl-                              |
| 6  | 18.087 | 0.21 | Benzene, 1,4-dimethyl-                       |
| 7  | 18.467 | 0.39 | Benzene, 1,3-dimethyl-                       |
| 8  | 19.914 | 0.90 | Cyclopentasiloxane, decamethyl-              |
| 9  | 21.145 | 0.20 | 1,4-Dimethylbenzene                          |
| 10 | 21.295 | 0.18 | N Heptanal                                   |
| 11 | 22.131 | 0.17 | Cyclohexene, 1-methyl-4-(1-methylethenyl)-   |
| 12 | 22.824 | 0.12 | 1,1-Dimethylethylamine, N-methoxycarbonyloxy |
| 13 | 22.905 | 0.16 | 1-Butanol, 3-methyl-                         |
| 14 | 24.243 | 0.29 | Furan, 2-pentyl-                             |
| 15 | 24.482 | 0.23 | Ethyl hexanoate                              |
| 16 | 25.729 | 0.47 | Benzene, ethenyl-                            |
| 17 | 27.955 | 0.27 | Octanal                                      |
| 18 | 29.781 | 0.18 | 10-Azido-1-decanethiol                       |
| 19 | 30.145 | 0.48 | 2-Heptenal, (E)-                             |
| 20 | 31.122 | 4.89 | Cyclohexasiloxane, dodecamethyl-             |
| 21 | 32.286 | 0.30 | 1-Hexanol                                    |
| 22 | 32.469 | 0.24 | Docosane                                     |
| 23 | 34.720 | 0.43 | Nonanal                                      |
| 24 | 35.259 | 0.17 | Methoxyacetic acid, 2-tridecyl ester         |
| 25 | 36.934 | 0.45 | (E)-Oct-2-enal                               |
| 26 | 37.451 | 0.28 | Octanoic acid, ethyl ester                   |
| 27 | 38.433 | 0.42 | 1-Octen-3-ol                                 |
| 28 | 38.822 | 3.08 | 2-Furan-carboxaldehyde                       |

|    |        |      |                                                                                       |
|----|--------|------|---------------------------------------------------------------------------------------|
| 29 | 40.005 | 1.70 | Pyrazine, tetramethyl-                                                                |
| 30 | 40.853 | 0.72 | 2,4-Heptadienal, (E,E)-                                                               |
| 31 | 40.934 | 0.34 | 2-Heptanol, 5-methyl-                                                                 |
| 32 | 41.457 | 1.07 | Ethanone, 1-(2-furanyl)-                                                              |
| 33 | 41.794 | 4.69 | Cycloheptasiloxane, tetradecamethyl-                                                  |
| 34 | 42.537 | 1.26 | Benzaldehyde                                                                          |
| 35 | 43.535 | 0.41 | (6Z)-6-Nonenal                                                                        |
| 36 | 43.753 | 0.21 | Nonanoic acid, ethyl ester                                                            |
| 37 | 44.375 | 0.33 | Cyclohexene, 1-methyl-4-(1-methylethylidene)-                                         |
| 38 | 45.570 | 0.33 | 2-Furancarboxaldehyde, 5-methyl-                                                      |
| 39 | 46.151 | 1.69 | 2,4-Pentanedione, 3-acetyl-                                                           |
| 40 | 46.896 | 0.42 | 6-Methyl-3,5-heptadien-2-one                                                          |
| 41 | 47.536 | 0.74 | Cyclohexanol, 2,6-dimethyl-                                                           |
| 42 | 48.068 | 0.16 | Furan, 2-ethenyltetrahydro-2-methyl-5-(5-methyl-1-methylene-4-hexeny 1)-, (2S-trans)- |
| 43 | 48.638 | 0.56 | 1-Cyclohexene-1-carboxaldehyde, 2,6,6-trimethyl-                                      |
| 44 | 49.636 | 1.76 | Benzeneacetaldehyde                                                                   |
| 45 | 50.034 | 1.19 | 1,3-Cyclohexadiene-1-carboxaldehyde, 2,6,6-trimethyl-                                 |
| 46 | 50.283 | 0.96 | Silanediol, dimethyl-                                                                 |
| 47 | 50.799 | 3.65 | 2-Furanmethanol                                                                       |
| 48 | 51.186 | 0.39 | 2-Ethyl-5-propylthiophene                                                             |
| 49 | 51.601 | 1.19 | Cyclooctasiloxane, hexadecamethyl-                                                    |
| 50 | 51.839 | 0.16 | Trimethylsilyl ester of furan-3-carboxylic acid                                       |
| 51 | 52.614 | 0.32 | 2-Cyclohexene-1,4-dione, 2,6,6-tri methyl-                                            |
| 52 | 57.173 | 0.53 | Methyl salicylate                                                                     |



|              |        |      |                                                                  |
|--------------|--------|------|------------------------------------------------------------------|
| 53           | 59.167 | 0.47 | 2,4-Decadienal, (E,E)-                                           |
| 54           | 59.711 | 0.19 | Silanediol, dimethyl-                                            |
| 55           | 60.353 | 0.26 | 1,1,1,5,7,7,7-Heptamethyl-3,3-bis(trimethylsiloxy)tetrasiloxane  |
| 56           | 60.942 | 0.21 | 2-Ethyl-.delta.-(1(2))-bicyclo[4.3 .0]nonene                     |
| 57           | 62.592 | 0.31 | Benzyl alcohol                                                   |
| 58           | 64.429 | 0.71 | Phenylethyl alcohol                                              |
| 59           | 65.955 | 0.70 | Trans-.beta.-ionone                                              |
| 60           | 67.351 | 0.65 | Ethanone, 1- (1H-pyrrol-2-yl)-                                   |
| 61           | 68.57  | 0.34 | 3-Buten-2-one, 4-(2,2,6-trimethyl-7-oxabicyclo[4.1.0]hept-1-yl)- |
| 62           | 68.973 | 0.70 | Furyl hydroxymethyl ketone                                       |
| 63           | 71.482 | 0.89 | Tetradecanoic acid, ethyl ester                                  |
| 64           | 76.351 | 0.28 | 4-Butyl-5-ethylimidazole                                         |
| 65           | 77.943 | 0.62 | 2-Methoxy-4-vinylphenol                                          |
| 66           | 80.978 | 2.78 | Hexadecanoic acid, ethyl ester                                   |
| 67           | 81.269 | 0.38 | 4H-Pyran-4-one, 2,3-dihydro-3,5-dihydroxy-6-methyl-              |
| 68           | 84.585 | 1.71 | 2(4H)-Benzofuranone, 5,6,7,7a-tetrahydro-4,4,7a-trimethyl-, (R)- |
| 69           | 94.466 | 6.61 | 1,4,7,10,13,16-Hexaoxacyclooctadecane                            |
| 70           | 95.343 | 3.32 | Benzoic acid, phenylmethyl ester                                 |
| <b>Go-22</b> |        |      |                                                                  |
| 1            | 7.675  | 0.78 | Acetic acid ethyl ester                                          |
| 2            | 7.953  | 0.20 | Acetic acid, hydroxy-                                            |
| 3            | 8.364  | 0.17 | Butanal, 2-methyl-                                               |
| 4            | 8.485  | 0.43 | Butanal, 3-methyl-                                               |
| 5            | 9.102  | 7.54 | Ethanol                                                          |

|    |        |      |                                                                         |
|----|--------|------|-------------------------------------------------------------------------|
| 6  | 15.283 | 0.10 | Hexanal                                                                 |
| 7  | 15.926 | 0.09 | 1-Propanol, 2-methyl-                                                   |
| 8  | 19.924 | 0.32 | Cyclopentasiloxane, decamethyl-                                         |
| 9  | 22.158 | 0.09 | D-Limonene                                                              |
| 10 | 22.802 | 0.09 | 1-Butanol, 2-methyl-                                                    |
| 11 | 22.881 | 0.25 | 1-Butanol, 3-methyl-                                                    |
| 12 | 24.258 | 0.32 | Furan, 2-pentyl-                                                        |
| 13 | 24.490 | 0.36 | Hexanoic acid, ethyl ester                                              |
| 14 | 25.574 | 0.06 | Cyclopropane, 1-(1-methylethenyl)-2-(2-methyl-1-propenyl)-, (1R-trans)- |
| 15 | 27.549 | 0.11 | Ethen-2-d-ol, (E)-                                                      |
| 16 | 27.954 | 0.13 | Octanal                                                                 |
| 17 | 30.143 | 0.33 | Pyrazine, 2,5-dimethyl-                                                 |
| 18 | 30.553 | 0.17 | Pyrazine, 2,6-dimethyl-                                                 |
| 19 | 30.968 | 0.06 | Ethyl heptanoate                                                        |
| 20 | 31.123 | 1.90 | Cyclohexasiloxane, dodecamethyl-                                        |
| 21 | 31.390 | 0.18 | 1,2-Propanediol                                                         |
| 22 | 32.476 | 0.42 | Tridecane, 2-methyl-                                                    |
| 23 | 33.740 | 0.13 | Disulfide, dipropyl                                                     |
| 24 | 34.719 | 0.07 | Nonanal                                                                 |
| 25 | 35.267 | 0.16 | Tetradecane                                                             |
| 26 | 35.491 | 1.10 | Pyrazine, trimethyl-                                                    |
| 27 | 36.933 | 0.26 | Benzene, 1,4-bis(1,1-dimethylethyl)-                                    |
| 28 | 37.452 | 0.58 | Octanoic acid, ethyl ester                                              |
| 29 | 37.974 | 0.07 | 2-(5-Methyl-5-vinyltetrahydro-2-furanyl)-2-propanol                     |

|    |        |      |                                                       |
|----|--------|------|-------------------------------------------------------|
| 30 | 38.327 | 0.12 | Propanal, 3-(methylthio)-                             |
| 31 | 38.433 | 0.40 | 1-Octen-3-ol                                          |
| 32 | 38.822 | 5.59 | 2-Furan-carboxaldehyde                                |
| 33 | 39.153 | 0.09 | 2-Amino-6-ethyl-3-methylpyridine                      |
| 34 | 39.534 | 0.28 | Hydrazine, 1,2-dimethyl-, dihydrochloride             |
| 35 | 39.689 | 0.91 | Acetic acid                                           |
| 36 | 40.007 | 5.55 | 2,3,5,6 Tetramethyl pyrazine                          |
| 37 | 41.799 | 1.58 | Cycloheptasiloxane, tetradecamethyl-                  |
| 38 | 42.535 | 3.40 | Benzaldehyde                                          |
| 39 | 43.528 | 0.11 | 2-Nonenal, (E)-                                       |
| 40 | 43.746 | 0.24 | Nonanoic acid, ethyl ester                            |
| 41 | 43.878 | 0.11 | 2,3-Butanediol                                        |
| 42 | 44.376 | 1.52 | L-Linalool                                            |
| 43 | 44.929 | 0.09 | Docosane                                              |
| 44 | 45.571 | 0.59 | 3,4,5-Trimethylpyrazole                               |
| 45 | 46.080 | 0.44 | 2,3-Butanediol                                        |
| 46 | 46.895 | 0.24 | (3E)-6-Methyl-3,5-heptadien-2-one                     |
| 47 | 47.023 | 0.20 | 2-Cyclohexen-1-one, 3,5,5-trimethyl-                  |
| 48 | 47.551 | 0.17 | Cyclohexanol, 2,6-dimethyl-                           |
| 49 | 48.060 | 0.37 | Neopentylidenecyclohexane                             |
| 50 | 48.539 | 0.19 | Benzoic acid, methyl ester                            |
| 51 | 48.632 | 0.2  | 1-Cyclohexene-1-carboxaldehyde, 2,6,6-trimethyl-      |
| 52 | 49.651 | 2.01 | Benzeneacetaldehyde                                   |
| 53 | 50.028 | 1.08 | 1,3-Cyclohexadiene-1-carboxaldehyde, 2,6,6-trimethyl- |

|    |        |      |                                                         |
|----|--------|------|---------------------------------------------------------|
| 54 | 50.149 | 0.21 | Cyclohexene, 3-methylene-4-vinyl-                       |
| 55 | 50.269 | 0.53 | Phenyl acetaldehyde                                     |
| 56 | 50.796 | 0.44 | 2-Furanmethanol                                         |
| 57 | 51.196 | 0.31 | 2-Isopropylimidazole                                    |
| 58 | 51.360 | 0.85 | Estragole                                               |
| 59 | 51.603 | 0.47 | Hexadecamethylcyclooctasiloxane                         |
| 60 | 51.826 | 0.25 | 2-Furancarboxamide, N-methyl-                           |
| 61 | 52.619 | 0.60 | 2-Cyclohexene-1,4-dione, 2,6,6-trimethyl-               |
| 62 | 52.937 | 0.29 | Gamma-Himachalene                                       |
| 63 | 53.128 | 0.43 | 3-Cyclohexene-1-methanol, .alpha., .alpha.,4-trimethyl- |
| 64 | 57.167 | 2.57 | Methyl salicylate                                       |
| 65 | 57.817 | 0.25 | Ethyl 2-phenylacetate                                   |
| 66 | 58.350 | 0.19 | Bicyclo[4.1.0]heptane, 1-methyl-                        |
| 67 | 59.423 | 0.39 | Acetic acid, 2-phenylethyl ester                        |
| 68 | 59.715 | 0.09 | Acetophenone, 2-hydroxy-                                |
| 69 | 61.133 | 0.67 | Dodecanoic acid, ethyl ester                            |
| 70 | 61.618 | 0.35 | Phenol, 2-methoxy-                                      |
| 71 | 64.429 | 1.35 | Phenylethyl alcohol                                     |
| 72 | 65.957 | 0.21 | Trans-.beta.-ionone                                     |
| 73 | 66.809 | 0.33 | 2-Methyl-3-methoxy-4H-pyran-4-one                       |
| 74 | 67.354 | 0.19 | Ethanone, 1-(1H-pyrrol-2-yl)-                           |
| 75 | 69.548 | 0.24 | Myristic acid, methyl ester                             |
| 76 | 70.236 | 1.91 | Benzeneethanol, 2-methoxy-                              |
| 77 | 70.969 | 0.12 | Nerolidol                                               |

|              |        |       |                                                                  |
|--------------|--------|-------|------------------------------------------------------------------|
| 78           | 71.029 | 0.07  | Ethyl methylphosphonate                                          |
| 79           | 71.481 | 1.41  | Tetradecanoic acid, ethyl ester                                  |
| 80           | 74.047 | 0.14  | Ethyl 13-methyl-tetradecanoate                                   |
| 81           | 74.771 | 0.18  | Thiophene, tetrahydro-                                           |
| 82           | 76.334 | 0.10  | 15-Crown-5                                                       |
| 83           | 77.063 | 0.80  | Phenol, 4-ethyl-                                                 |
| 84           | 77.940 | 1.56  | 2-Methoxy-4-vinylphenol                                          |
| 85           | 79.282 | 1.30  | Hexadecanoic acid, methyl ester                                  |
| 86           | 80.979 | 5.29  | Hexadecanoic acid, ethyl ester                                   |
| 87           | 82.119 | 0.46  | Ethyl 9-hexadecenoate                                            |
| 88           | 84.583 | 0.40  | 2(4H)-Benzofuranone, 5,6,7,7a-tetrahydro-4,4,7a-trimethyl-, (R)- |
| 89           | 86.483 | 0.69  | Benzofuran, 2,3-dihydro-                                         |
| 90           | 89.087 | 1.54  | 7-Octadecenoic acid, methyl ester                                |
| 91           | 89.395 | 2.55  | 1,4,7,10,13,16-Hexaoxacyclooctadecane                            |
| 92           | 90.522 | 5.66  | Ethyl oleate                                                     |
| 93           | 90.855 | 0.52  | 15-Crown-5                                                       |
| 94           | 91.041 | 4.43  | 9,12-Octadecadienoic acid (Z,Z)-,methyl ester                    |
| 95           | 92.431 | 15.45 | Linoleic acid ethyl ester                                        |
| 96           | 94.470 | 2.27  | Ethyl 9,12,15-octadecatrienoate                                  |
| <b>Go-23</b> |        |       |                                                                  |
| 1            | 7.672  | 0.93  | Ethyl acetate                                                    |
| 2            | 7.829  | 0.05  | Ethane, 1,1-diethoxy-                                            |
| 3            | 7.960  | 0.24  | Formic acid., propyl ester                                       |
| 4            | 9.161  | 31.9  | Ethanol                                                          |

|    |        |      |                                               |
|----|--------|------|-----------------------------------------------|
| 5  | 19.915 | 0.05 | 2,2-Dideuteropropane                          |
| 6  | 22.825 | 0.09 | 2-Methylbutan-1-ol                            |
| 7  | 22.904 | 0.48 | 1-Butanol, 3-methyl-                          |
| 8  | 25.724 | 0.03 | Benzene, ethenyl-                             |
| 9  | 27.565 | 0.42 | 2-Butanone, 3-hydroxy-                        |
| 10 | 28.791 | 0.02 | Methoxyacetic acid, 3-tetradecyl ester        |
| 11 | 30.955 | 0.01 | Decanoic acid, ethyl ester                    |
| 12 | 31.125 | 0.22 | Cyclohexasiloxane, dodecamethyl-              |
| 13 | 31.401 | 0.16 | Propanoic acid, 2-hydroxy-, ethyl ester, (S)- |
| 14 | 32.289 | 0.02 | 1-Hexanol                                     |
| 15 | 32.462 | 0.03 | Tridecane, 2-methyl-                          |
| 16 | 35.252 | 0.04 | Tetradecane                                   |
| 17 | 36.921 | 0.02 | Benzene, 1,3-bis(1,1-dimethylethyl)-          |
| 18 | 37.445 | 0.29 | Octanoic acid, ethyl ester                    |
| 19 | 38.818 | 0.17 | 2 -Furan -carboxaldehyde                      |
| 20 | 39.677 | 0.19 | Acetic acid                                   |
| 21 | 40.008 | 0.14 | Pyrazine, tetramethyl-                        |
| 22 | 40.883 | 0.05 | Ethyl tridecanoate                            |
| 23 | 41.803 | 0.17 | Cycloheptasiloxane, tetradecamethyl-          |
| 24 | 42.537 | 0.23 | Benzaldehyde                                  |
| 25 | 43.741 | 0.07 | Nonanoic acid, ethyl ester                    |
| 26 | 43.875 | 0.10 | 2,3-Butanediol, [R-(R@,R@)]-                  |
| 27 | 44.371 | 0.07 | L-Linalool                                    |
| 28 | 44.924 | 0.02 | Hentriacontane                                |

|    |        |      |                                                                        |
|----|--------|------|------------------------------------------------------------------------|
| 29 | 46.074 | 0.22 | 2,3-Butanediol                                                         |
| 30 | 46.904 | 0.03 | Methane, [(1-ethynylcyclohexyl)oxy]methoxy-                            |
| 31 | 47.562 | 0.04 | Hexadecane                                                             |
| 32 | 48.060 | 0.23 | Neopentylidenecyclohexane                                              |
| 33 | 49.634 | 0.04 | Phenyl acetaldehyde                                                    |
| 34 | 49.806 | 0.49 | Decanoic acid, ethyl ester                                             |
| 35 | 50.014 | 0.07 | 1,3-Cyclohexadiene-1-carboxaldehyde, 2,6,6-trimethyl-                  |
| 36 | 50.292 | 0.10 | Silanediol, dimethyl-                                                  |
| 37 | 50.798 | 0.06 | 2- Furanmethanol                                                       |
| 38 | 51.190 | 0.05 | Benzoic acid, ethyl ester                                              |
| 39 | 51.807 | 0.07 | Butanedioic acid, diethyl ester                                        |
| 40 | 52.758 | 0.02 | Ethyl 9-decenoate                                                      |
| 41 | 52.93  | 0.04 | cis-(-)-2,4a,5,6,9a-Hexahydro-3,5,5,9-tetramethyl(1H)benzocycloheptene |
| 42 | 53.124 | 0.03 | 3-Cyclohexene-1-methanol, .alpha.,.alpha.,4-trimethyl-                 |
| 43 | 57.172 | 0.13 | Methyl salicylate                                                      |
| 44 | 57.814 | 0.04 | Benzeneacetic acid, ethyl ester                                        |
| 45 | 58.917 | 0.04 | Dodecanoic acid, methyl ester                                          |
| 46 | 59.423 | 0.17 | Acetic acid, 2-phenylethyl ester                                       |
| 47 | 59.734 | 0.02 | Silanediol, dimethyl-                                                  |
| 48 | 61.134 | 1.45 | Dodecanoic acid, ethyl ester                                           |
| 49 | 64.431 | 1.27 | Benzeneethanol                                                         |
| 50 | 65.959 | 0.05 | 3-Buten-2-one, 4-(2,6,6-trimethyl-1-cyclohexen-1-yl)-                  |
| 51 | 69.547 | 0.05 | Methyl tetradecanoate                                                  |
| 52 | 70.226 | 0.05 | 2(3H)-Furanone, dihydro-5-pentyl-                                      |

|    |        |       |                                                                               |
|----|--------|-------|-------------------------------------------------------------------------------|
| 53 | 70.959 | 0.02  | 1,6,10-Dodecatrien-3-ol, 3,7,11-trimethyl-, (R)-                              |
| 54 | 71.486 | 3.28  | Tetradecanoic acid, ethyl ester                                               |
| 55 | 72.903 | 0.05  | 1-(1'-Azetidiny)-2,6-dimethyl-1-cyclohexene                                   |
| 56 | 73.259 | 0.02  | 12-Crown-4                                                                    |
| 57 | 74.044 | 0.55  | Pentadecanoic acid, ethyl ester                                               |
| 58 | 74.755 | 0.06  | Octadecanoic acid, ethyl ester                                                |
| 59 | 77.058 | 0.02  | Phenol, 3-ethyl-                                                              |
| 60 | 77.939 | 0.06  | 2-(4-Methylphenyl)thiirane                                                    |
| 61 | 79.028 | 0.06  | Diethyl azelate                                                               |
| 62 | 79.284 | 0.47  | Hexadecanoic acid, methyl ester                                               |
| 63 | 81.035 | 20.77 | Hexadecanoic acid, ethyl ester                                                |
| 64 | 81.790 | 0.3   | 15-Crown-5                                                                    |
| 65 | 82.128 | 1.07  | Ethyl 9-hexadecenoate                                                         |
| 66 | 84.578 | 0.09  | 2(4H)-Benzofuranone, 5,6,7,7a-tetrahydro-4,4,7a-trimethyl-, (R)-              |
| 67 | 85.440 | 0.07  | Heptadecanoic acid, ethyl ester                                               |
| 68 | 89.738 | 0.71  | Octadecanoic acid, ethyl ester                                                |
| 69 | 90.251 | 0.10  | 1(2H)-Acenaphthylenone, decahydro-, (2a.alpha. 5a.alpha. 8a.alpha. 8b.beta.)- |
| 70 | 90.536 | 5.18  | Ethyl oleate                                                                  |
| 71 | 90.862 | 0.55  | (E)-9-Octadecenoic acid ethyl ester                                           |
| 72 | 91.046 | 0.59  | 9,12-Octadecadienoic acid (Z,Z)-,methyl ester                                 |
| 73 | 92.474 | 20.53 | Linoleic acid ethyl ester                                                     |
| 74 | 94.476 | 2.66  | 9,12,15-Octadecatrienoic acid, ethyl ester, (Z,Z,Z)-                          |
| 75 | 95.146 | 1.54  | 1,4,7,10,13,16-Hexaoxacyclooctadecane                                         |
| 76 | 95.301 | 0.14  | Octaethylene glycol monododecyl ether                                         |



---

**Go-24**

|    |        |      |                                                     |
|----|--------|------|-----------------------------------------------------|
| 1  | 5.261  | 0.04 | Carbon disulfide                                    |
| 2  | 7.674  | 0.77 | Acetic acid, ethyl ester                            |
| 3  | 7.832  | 0.03 | Ethane, 1,2-diethoxy-                               |
| 4  | 7.954  | 0.04 | 1-Propanamine, 3-methoxy-                           |
| 5  | 9.122  | 8.42 | Ethanol                                             |
| 6  | 15.909 | 0.02 | Carbonic acid, dimethyl ester                       |
| 7  | 18.563 | 0.03 | Benzene, 1,4-dimethyl-                              |
| 8  | 19.929 | 0.03 | N-(4'-Chlorophenyl)-8-fluoro-3-methyl-isoalloxazine |
| 9  | 21.771 | 0.11 | Pentanoic acid, 4-methyl-, ethyl ester              |
| 10 | 22.176 | 0.05 | Oxazole, trimethyl-                                 |
| 11 | 22.876 | 0.08 | 1-Butanol, 3-methyl-                                |
| 12 | 24.028 | 0.04 | Isothiazole, 3-methyl-                              |
| 13 | 24.260 | 0.03 | Furan, 2-pentyl-                                    |
| 14 | 24.492 | 0.07 | Ethyl hexanoate                                     |
| 15 | 27.379 | 0.03 | Thiazole, 5-methyl-                                 |
| 16 | 27.537 | 0.16 | 2-Butanone, 3-hydroxy-                              |
| 17 | 28.877 | 0.03 | D-Xylose, 3,4,5-tri-o-methyl-                       |
| 18 | 30.132 | 0.10 | Pyrazine, 2,5-dimethyl-                             |
| 19 | 31.128 | 0.13 | Cyclohexasiloxane, dodecamethyl-                    |
| 20 | 31.676 | 0.02 | Pyrazine, 2,3-dimethyl-                             |
| 21 | 32.399 | 8.44 | Allyl isothiocyanate                                |
| 22 | 32.901 | 0.02 | Allyl isothiocyanate                                |
| 23 | 35.491 | 0.63 | Pyrazine, trimethyl-                                |

---

|    |        |       |                                         |
|----|--------|-------|-----------------------------------------|
| 24 | 37.454 | 0.07  | Octanoic acid, ethyl ester              |
| 25 | 38.112 | 0.21  | 1-Propene, 3-isothiocyanato-            |
| 26 | 38.819 | 0.03  | 2-Furan-carboxaldehyde                  |
| 27 | 39.155 | 0.04  | Pyrazine, 3-ethyl-2,5-dimethyl-         |
| 28 | 40.037 | 12.13 | 2,3,5,6 Tetramethyl pyrazine            |
| 29 | 41.799 | 0.29  | Cycloheptasiloxane, tetradecamethyl-    |
| 30 | 42.428 | 0.29  | 2,3,5-Trimethyl-6-ethylpyrazine         |
| 31 | 42.534 | 0.11  | Benzaldehyde                            |
| 32 | 43.742 | 0.02  | Nonanoic acid, ethyl ester              |
| 33 | 43.870 | 0.59  | 2,3-Butanediol                          |
| 34 | 44.232 | 0.02  | 2-Pentanol, 3-methyl-                   |
| 35 | 45.575 | 0.02  | 1,3-Cyclohexadien-1-yl methyl ether     |
| 36 | 45.712 | 0.04  | 1,3-Dihydrobenzimidazol-2-one           |
| 37 | 46.076 | 0.35  | 1,3-Butanediol                          |
| 38 | 47.413 | 0.10  | Propanoic acid, 2-methyl-               |
| 39 | 47.513 | 0.06  | Acetic acid ethyl ester                 |
| 40 | 47.728 | 0.02  | Propanoic acid, 2-methyl-               |
| 41 | 47.913 | 0.02  | Isobutyric acid, ethyl ester            |
| 42 | 48.068 | 0.03  | Hydrazine, 1,1-diethyl-                 |
| 43 | 48.541 | 0.04  | Carbamic acid, 2-propenyl-, ethyl ester |
| 44 | 48.930 | 0.01  | Hydrazine, 1-(1-methylethyl)-2-propyl-  |
| 45 | 49.603 | 0.03  | Phenyl acetaldehyde                     |
| 46 | 49.809 | 0.03  | Decanoic acid, ethyl ester              |
| 47 | 50.802 | 0.03  | 3-Furanmethanol                         |

---

|    |        |      |                                          |
|----|--------|------|------------------------------------------|
| 48 | 51.181 | 0.02 | Benzoic acid, ethyl ester                |
| 49 | 51.604 | 0.11 | Cyclooctasiloxane, hexadecamethyl-       |
| 50 | 51.797 | 0.03 | Butanedioic acid, diethyl ester          |
| 51 | 52.839 | 0.52 | Butanoic acid, 3-methyl-                 |
| 52 | 56.528 | 0.15 | N-Hydroxymethylacetamide                 |
| 53 | 57.813 | 0.18 | Benzeneacetic acid, ethyl ester          |
| 54 | 59.746 | 0.03 | Silanediol, dimethyl-                    |
| 55 | 61.130 | 0.17 | Dodecanoic acid, ethyl ester             |
| 56 | 63.098 | 0.60 | Ethyl 3-phenylpropionate                 |
| 57 | 64.426 | 0.16 | Benzeneethanol                           |
| 58 | 65.306 | 0.06 | Benzeneacetaldehyde, .alpha.-ethylidene- |
| 59 | 68.991 | 0.16 | Phenol                                   |
| 60 | 69.110 | 0.34 | Tetradecanoic acid, ethyl ester          |
| 61 | 69.375 | 0.08 | 5-Methyltetrahydrothiophen-2-one         |
| 62 | 71.48  | 1.20 | Tetradecanoic acid, ethyl ester          |
| 63 | 72.003 | 0.02 | Heptaethylene glycol monododecyl ether   |
| 64 | 74.757 | 1.99 | Pentadecanoic acid, ethyl ester          |
| 65 | 76.667 | 0.04 | 4-Methoxy-N-methylbenzenamine.           |
| 66 | 76.813 | 0.03 | 12-Crown-4                               |
| 67 | 77.354 | 0.02 | Hexaethylene glycol                      |
| 68 | 77.937 | 1.18 | 2-Methoxy-4-vinylphenol                  |
| 69 | 79.284 | 0.09 | Hexadecanoic acid, methyl ester          |
| 70 | 81.017 | 14.8 | Hexadecanoic acid, ethyl ester           |
| 71 | 81.790 | 0.08 | 15-Crown-5                               |

---

|              |        |       |                                                                                    |
|--------------|--------|-------|------------------------------------------------------------------------------------|
| 72           | 82.123 | 0.34  | Ethyl 9-hexadecenoate                                                              |
| 73           | 84.571 | 0.02  | 2(4H)-Benzofuranone, 5,6,7,7a-tetrahydro-4,4,7a-trimethyl-, (R)-                   |
| 74           | 85.434 | 0.05  | Heptadecanoic acid, ethyl ester                                                    |
| 75           | 86.484 | 0.26  | Benzofuran, 2,3-dihydro-                                                           |
| 76           | 87.376 | 1.94  | 1,4,7,10,13,16-Hexaoxacyclooctadecane                                              |
| 77           | 89.743 | 0.61  | Octadecanoic acid, ethyl ester                                                     |
| 78           | 90.550 | 10.9  | Ethyl oleate                                                                       |
| 79           | 90.864 | 0.81  | (E)-9-Octadecenoic acid ethyl ester                                                |
| 80           | 91.049 | 0.25  | 9,12-Octadecadienoic acid (Z,Z)-, methyl ester                                     |
| 81           | 92.485 | 25.01 | Linoleic acid ethyl ester                                                          |
| 82           | 94.479 | 3.87  | 9,12,15-Octadecatrienoic acid, ethyl ester, (Z,Z,Z)-                               |
| <b>Go-25</b> |        |       |                                                                                    |
| 1            | 6.453  | 0.07  | Acetic acid, methyl ester                                                          |
| 2            | 7.667  | 0.54  | Acetic acid, ethyl ester                                                           |
| 3            | 7.945  | 0.39  | Acetic acid, hydroxy-                                                              |
| 4            | 9.105  | 11.96 | Ethanol                                                                            |
| 5            | 15.907 | 0.17  | 2-Butanol                                                                          |
| 6            | 19.923 | 0.10  | Cyclopentasiloxane, decamethyl-                                                    |
| 7            | 21.762 | 0.04  | Pentanoic acid, 4-methyl-, ethyl ester                                             |
| 8            | 22.873 | 0.35  | 1 -Butanol, 3-methyl-                                                              |
| 9            | 24.489 | 0.16  | Hexanoic acid, ethyl ester                                                         |
| 10           | 28.881 | 0.04  | Glycine, N-[S-[5-(acetylamino)-2-hydroxyphenyl]-N-L-Gamma-glutamyl -L-cystein yl]- |
| 11           | 30.135 | 0.22  | Pyrazine, 2, 5-dimethyl-                                                           |
| 12           | 31.124 | 0.76  | Cyclohexasiloxane, dodecamethyl-                                                   |

|    |        |      |                                                                         |
|----|--------|------|-------------------------------------------------------------------------|
| 13 | 31.387 | 0.04 | 2,3-Butanediol                                                          |
| 14 | 35.266 | 0.04 | Undecane                                                                |
| 15 | 35.489 | 0.19 | Pyrazine, trimethyl-                                                    |
| 16 | 37.450 | 0.18 | Octanoic acid, ethyl ester                                              |
| 17 | 37.973 | 0.03 | 2-Furanmethanol, 5-ethenyltetrahydro-.alpha.,.alpha.,5-trimethyl-, cis- |
| 18 | 38.817 | 0.31 | 2-Furan-carboxaldehyde                                                  |
| 19 | 40.002 | 0.62 | Pyrazine, tetramethyl-                                                  |
| 20 | 41.448 | 0.15 | Ethanone, 1-(2-furanyl)-                                                |
| 21 | 41.795 | 1.03 | Tetradecamethyl-cyclo-hepta-siloxane                                    |
| 22 | 42.531 | 0.12 | Benzaldehyde                                                            |
| 23 | 43.743 | 0.07 | Nonanoic acid, ethyl ester                                              |
| 24 | 43.866 | 0.07 | 2,3-Butanediol                                                          |
| 25 | 44.373 | 0.08 | Cyclohexene, 1-methyl-4-(1-methylethylidene)-                           |
| 26 | 45.555 | 0.05 | 1, 3-Cyclohexadien-1-yl methyl ether                                    |
| 27 | 45.791 | 0.03 | (2S,6S)-Bicyclo[2.2.2]octane-2,6-diol                                   |
| 28 | 46.070 | 0.21 | 2,3-Butanediol                                                          |
| 29 | 46.886 | 0.06 | 2-Cyclopenten-1-one, 3,5,5-trimethyl-                                   |
| 30 | 47.026 | 0.03 | Methyl oligosaccharide                                                  |
| 31 | 47.530 | 0.05 | 3-Acetyl-2,6-heptanedione                                               |
| 32 | 48.068 | 0.11 | (1R,3R,8S)-3-(Methyl)bicyclo[6.1.0]nonan-2-one                          |
| 33 | 48.543 | 0.05 | Benzoic acid, methyl ester                                              |
| 34 | 48.689 | 0.09 | Azetidine, 1-nitroso-                                                   |
| 35 | 49.630 | 0.18 | Benzeneacetaldehyde                                                     |
| 36 | 49.802 | 0.16 | Decanoic acid, ethyl ester                                              |

|    |        |      |                                                              |
|----|--------|------|--------------------------------------------------------------|
| 37 | 50.025 | 0.20 | 1,3-Cyclohexadiene-1-carboxaldehyde, 2,6,6-trimethyl-        |
| 38 | 50.795 | 0.57 | 2- Furanmethanol                                             |
| 39 | 51.192 | 0.08 | 2-Oxabicyclo[3.1.0]hex-3-ene-4-carboxylic acid, methyl ester |
| 40 | 51.600 | 0.31 | Hexadecamethylcyclooctasiloxane                              |
| 41 | 51.791 | 0.10 | Butanedioic acid, diethyl ester                              |
| 42 | 53.126 | 0.08 | Beta. Fenchyl alcohol                                        |
| 43 | 56.354 | 0.12 | Benzeneacetic acid, methyl ester                             |
| 44 | 57.167 | 0.40 | Methyl salicylate                                            |
| 45 | 57.813 | 0.23 | Acetic acid, phenyl-, ethyl ester                            |
| 46 | 58.910 | 0.09 | Dodecanoic acid, methyl ester                                |
| 47 | 59.419 | 0.06 | B-Phenylethyl formate                                        |
| 48 | 59.715 | 0.05 | Silanediol, dimethyl-                                        |
| 49 | 60.348 | 0.04 | Cyclononasiloxane, octadecamethyl-                           |
| 50 | 60.946 | 0.03 | 2-Ethyl-.delta.-(1(2))-bicyclo[4.3.0]nonene                  |
| 51 | 61.127 | 0.77 | Dodecanoic acid, ethyl ester                                 |
| 52 | 62.590 | 0.07 | Benzyl alcohol                                               |
| 53 | 64.427 | 0.98 | Benzeneethanol                                               |
| 54 | 67.348 | 0.21 | Ethanone, 1-(1H-pyrrol-2-yl)-                                |
| 55 | 67.820 | 0.48 | 4H-Pyran-4-one, 3-hydroxy-2-methyl                           |
| 56 | 68.143 | 0.15 | Maltol                                                       |
| 57 | 69.541 | 0.27 | Myristic acid, methyl ester                                  |
| 58 | 71.480 | 2.39 | Tetradecanoic acid, ethyl ester                              |
| 59 | 72.173 | 0.04 | Methyl 13-methyltetradecanoate                               |
| 60 | 72.897 | 0.05 | Tetradecanoic acid, 12-methyl-, methyl ester, (S)-           |

|              |        |       |                                                      |
|--------------|--------|-------|------------------------------------------------------|
| 61           | 74.040 | 0.36  | Pentadecanoic acid, ethyl ester                      |
| 62           | 74.754 | 0.31  | Ethyl 13-methyl-tetradecanoate                       |
| 63           | 77.939 | 0.34  | 2-Methoxy-4-vinylphenol                              |
| 64           | 78.779 | 0.09  | Hexadecanoic acid, ethyl ester                       |
| 65           | 79.028 | 0.08  | 12-Crown-4                                           |
| 66           | 79.280 | 2.06  | Hexadecanoic acid, methyl ester                      |
| 67           | 80.470 | 0.13  | Methyl 9-hexadecenoate                               |
| 68           | 80.994 | 15.43 | Hexadecanoic acid, ethyl ester                       |
| 69           | 82.118 | 1.11  | Ethyl 9-hexadecenoate                                |
| 70           | 83.260 | 0.09  | Phenol, 2,4-bis(1,1-dimethylethyl)                   |
| 71           | 84.573 | 0.15  | Dihydroactinidiolide                                 |
| 72           | 84.710 | 0.08  | 15-Crown-5                                           |
| 73           | 86.478 | 0.27  | Benzofuran, 2,3-dihydro-                             |
| 74           | 88.240 | 3.39  | 1,4,7,10,13,16-Hexaoxacyclooctadecane                |
| 75           | 89.081 | 1.11  | 9-Octadecenoic acid, methyl ester, (E)-              |
| 76           | 89.732 | 0.74  | Octadecanoic acid, ethyl ester                       |
| 77           | 90.529 | 7.55  | Ethyl (9Z)-9-octadecenoate                           |
| 78           | 90.860 | 0.84  | Ethyl oleate                                         |
| 79           | 91.046 | 5.13  | 9,12-Octadecadienoic acid (Z,Z)-,methyl ester        |
| 80           | 92.459 | 31.19 | Linoleic acid ethyl ester                            |
| 81           | 94.472 | 3.01  | 9,12,15-Octadecatrienoic acid, ethyl ester, (Z,Z,Z)- |
| <b>Go-26</b> |        |       |                                                      |
| 1            | 6.453  | 0.07  | Acetic acid, methyl ester                            |
| 2            | 7.666  | 0.78  | Acetic acid ethyl ester                              |

|    |        |       |                                                               |
|----|--------|-------|---------------------------------------------------------------|
| 3  | 7.946  | 0.25  | Formic acid, propyl ester                                     |
| 4  | 8.478  | 0.07  | Butanal, 3-methyl-                                            |
| 5  | 9.110  | 13.10 | Ethanol                                                       |
| 6  | 15.935 | 0.20  | 1-Propanol, 2-methyl-                                         |
| 7  | 17.618 | 0.06  | Ethyl 2-cyano-3-oxobutanoate                                  |
| 8  | 19.920 | 0.07  | 6-Aza-5,7,12,14-tetrathiapentacene                            |
| 9  | 22.880 | 1.04  | 1-Butanol, 3-methyl-                                          |
| 10 | 24.255 | 0.04  | Furan, 2-pentyl-                                              |
| 11 | 24.485 | 0.22  | Hexanoic acid, ethyl ester                                    |
| 12 | 25.737 | 0.06  | Benzene, ethenyl-                                             |
| 13 | 27.535 | 0.08  | 2-Butanone, 3-hydroxy-                                        |
| 14 | 28.877 | 0.07  | Nonanoic acid, 2,4,6-trimethyl-, ethyl ester, (2S,4R,6R)-(+)- |
| 15 | 30.133 | 0.25  | Pyrazine, 2,5-dimethyl-                                       |
| 16 | 30.539 | 0.03  | Pyrazine, 2,6-dimethyl-                                       |
| 17 | 31.125 | 0.43  | Cyclohexasiloxane, dodecamethyl-                              |
| 18 | 31.387 | 0.05  | Ethanol, 2,2'-oxybis-                                         |
| 19 | 32.274 | 0.05  | 1-Hexanol                                                     |
| 20 | 32.468 | 0.13  | Dodecane, 3-methyl-                                           |
| 21 | 35.262 | 0.09  | Undecane                                                      |
| 22 | 35.489 | 0.23  | Pyrazine, trimethyl-                                          |
| 23 | 36.936 | 0.05  | 1-(2-Pentylphenyl)ethanone                                    |
| 24 | 37.449 | 0.25  | Octanoic acid, ethyl ester                                    |
| 25 | 37.970 | 0.03  | 2-(5-Methyl-5-vinyltetrahydro-2-furanyl)-2-propanol           |
| 26 | 38.094 | 0.05  | Pyrazine, 2-ethyl-3,5-dimethyl-                               |



|    |        |      |                                                                   |
|----|--------|------|-------------------------------------------------------------------|
| 27 | 38.431 | 0.05 | 1-Octen-3-ol                                                      |
| 28 | 38.817 | 0.60 | Furfural                                                          |
| 29 | 39.146 | 0.03 | Pyrazine, 5-ethyl-2,3-dimethyl-                                   |
| 30 | 39.679 | 0.08 | 2-Methyl-1-tetradecene                                            |
| 31 | 40.004 | 1.19 | 2,3,5,6 Tetramethyl pyrazine                                      |
| 32 | 40.884 | 0.06 | Methyl-4-deoxy-2-o-methyl.beta.1-threo-hex-4-enopyranosid uronate |
| 33 | 41.798 | 0.58 | Cycloheptasiloxane, tetradecamethyl-                              |
| 34 | 42.423 | 0.08 | 2,3,5-Trimethyl-6-ethylpyrazine                                   |
| 35 | 42.531 | 0.32 | Benzaldehyde                                                      |
| 36 | 43.744 | 0.09 | Nonanoic acid, ethyl ester                                        |
| 37 | 43.866 | 0.19 | 1,3-Butanediol                                                    |
| 38 | 44.050 | 0.09 | 2-Pentanol, 4-methyl-                                             |
| 39 | 44.376 | 0.12 | L-Linalool                                                        |
| 40 | 44.929 | 0.03 | Docosane                                                          |
| 41 | 45.529 | 0.08 | 1,3-Cyclohexadien-1-yl methyl ether                               |
| 42 | 45.796 | 0.04 | 1-Propanone, 1-(2-furanyl)-                                       |
| 43 | 46.072 | 0.36 | 2,3-Butanediol                                                    |
| 44 | 46.891 | 0.07 | 2-Cyclopenten-1-one, 3,5,5-trimethyl-                             |
| 45 | 47.025 | 0.20 | Decanoic acid, ethyl ester                                        |
| 46 | 47.555 | 0.05 | Cyclohexanone, 4-hydroxy-4-methyl-                                |
| 47 | 48.063 | 0.77 | Neopentylidenecyclohexane                                         |
| 48 | 48.259 | 0.06 | 1,6-Dideoxy-1-mannitol                                            |
| 49 | 48.545 | 0.14 | Benzoic acid, methyl ester                                        |
| 50 | 49.693 | 0.07 | 2(3H)-Furanone, dihydro-                                          |

---

|    |        |      |                                                       |
|----|--------|------|-------------------------------------------------------|
| 51 | 49.634 | 0.29 | Benzeneacetaldehyde                                   |
| 52 | 49.801 | 0.29 | Decanoic acid, ethyl ester                            |
| 53 | 50.024 | 0.29 | 1,3-Cyclohexadiene-1-carboxaldehyde, 2,6,6-trimethyl- |
| 54 | 50.295 | 0.18 | Silanediol, dimethyl-                                 |
| 55 | 50.795 | 0.69 | 2-Furanmethanol                                       |
| 56 | 51.183 | 0.20 | Benzoic acid, ethyl ester                             |
| 57 | 51.602 | 0.13 | Cyclooctasiloxane, hexadecamethyl-                    |
| 58 | 51.800 | 0.05 | Butanedioic acid, diethyl ester                       |
| 59 | 52.952 | 0.14 | 5-Methylhexanoic acid                                 |
| 60 | 53.124 | 0.24 | Butanoic acid, 3-methyl-                              |
| 61 | 56.354 | 0.13 | Benzeneacetic acid. methyl ester                      |
| 62 | 57.171 | 0.31 | Methyl salicylate                                     |
| 63 | 57.812 | 0.61 | Benzeneacetic acid, ethyl ester                       |
| 64 | 58.911 | 0.14 | Dodecanoic acid, methyl ester                         |
| 65 | 59.421 | 0.27 | Acetic acid, 2-phenylethyl ester                      |
| 66 | 59.738 | 0.04 | Silanediol, dimethyl-                                 |
| 67 | 60.967 | 0.02 | Methyl 2-hydroxythiazole-4-carboxylate                |
| 68 | 61.128 | 1.00 | Dodecanoic acid, ethyl ester                          |
| 69 | 61.607 | 0.12 | Phenol, 2-methoxy-                                    |
| 70 | 62.585 | 0.08 | Benzenemethanol                                       |
| 71 | 64.425 | 2.50 | Benzeneethanol                                        |
| 72 | 65.305 | 0.19 | Benzeneacetaldehyde, .alpha.-ethylidene-              |
| 73 | 65.955 | 0.12 | Trans-.beta.-ionone                                   |
| 74 | 67.348 | 0.28 | Ethanone, 1-(1H-pyrrol-2-yl)-                         |

---

|    |        |       |                                               |
|----|--------|-------|-----------------------------------------------|
| 75 | 67.836 | 0.16  | 4H-Pyran-4-one, 3-hydroxy-2-methyl            |
| 76 | 67.954 | 0.03  | Maltol                                        |
| 77 | 69.108 | 0.13  | Undecanoic acid, ethyl ester                  |
| 78 | 69.539 | 0.34  | Myristic acid, methyl ester                   |
| 79 | 70.233 | 0.27  | Benzeneethanol, 2-methoxy-                    |
| 80 | 70.959 | 0.17  | 1,6,10-Dodecatrien-3-ol, 3,7,11-trimethyl-    |
| 81 | 71.48  | 2.40  | Tetradecanoic acid, ethyl ester               |
| 82 | 72.182 | 0.10  | Methyl 9-methyltetradecanoate                 |
| 83 | 72.431 | 0.04  | 1,4,7,10,13,16,19-Heptaoxa-2-cycloheicosanone |
| 84 | 72.718 | 0.07  | Benzene, 1-butyryl-                           |
| 85 | 72.902 | 0.08  | Methyl 13-methyltetradecanoate                |
| 86 | 73.643 | 0.05  | 1H-Pyrrole-2-carboxaldehyde, 5-methyl-        |
| 87 | 74.038 | 1.15  | Pentadecanoic acid, ethyl ester               |
| 88 | 76.334 | 0.09  | Ethyl 13-methyl-tetradecanoate                |
| 89 | 77.053 | 0.13  | Phenol, 2-ethyl                               |
| 90 | 77.936 | 0.11  | 4-Vinyl-2-methoxy-phenol                      |
| 91 | 79.279 | 3.19  | Hexadecanoic acid, methyl ester               |
| 92 | 80.466 | 0.06  | Heptaethylene glycol monododecyl ether        |
| 93 | 80.998 | 16.35 | Hexadecanoic acid, ethyl ester                |
| 94 | 82.119 | 0.62  | Ethyl 9-hexadecenoate                         |
| 95 | 84.581 | 0.09  | Dihydroactinidiolide                          |
| 96 | 86.479 | 0.11  | 1,3-Dithiane                                  |
| 97 | 88.236 | 2.29  | 1,4,7,10,13,16-Hexaoxacyclooctadecane         |
| 98 | 89.084 | 1.07  | 9-Octadecenoic acid (Z)-, methyl ester        |

|              |        |       |                                               |
|--------------|--------|-------|-----------------------------------------------|
| 99           | 89.732 | 0.56  | Octadecanoic acid, ethyl ester                |
| 100          | 90.529 | 6.70  | Ethyl oleate                                  |
| 101          | 90.86  | 0.60  | (E)-9-Octadecenoic acid ethyl ester           |
| 102          | 91.044 | 4.57  | 9,12-Octadecadienoic acid (Z,Z)-,methyl ester |
| 103          | 92.452 | 24.43 | Linoleic acid ethyl ester                     |
| 104          | 94.468 | 2.60  | Ethyl 9,12,15-octadecatrienoate               |
| <b>Go-27</b> |        |       |                                               |
| 1            | 5.423  | 0.03  | Methane, thiobis-                             |
| 2            | 7.664  | 1.18  | Ethyl acetate                                 |
| 3            | 7.946  | 0.11  | 1, 2-Hydrazinedicarboxaldehyde                |
| 4            | 8.478  | 0.05  | Butanal, 3-methyl-                            |
| 5            | 9.120  | 21.07 | Ethanol                                       |
| 6            | 14.608 | 0.41  | Butanoic acid, 3-methyl-, ethyl ester         |
| 7            | 15.952 | 0.27  | 1- Propanol, 2-methyl-                        |
| 8            | 17.613 | 0.10  | 1-Butanol, 3-methyl-, acetate                 |
| 9            | 19.921 | 0.17  | Cyclopentasiloxane, decamethyl-               |
| 10           | 22.023 | 0.03  | Isopentyl 2-methylpropanoate                  |
| 11           | 22.805 | 0.23  | 1-Butanol, 2-methyl-                          |
| 12           | 22.885 | 1.07  | 1-Butanol, 3-methyl-                          |
| 13           | 24.256 | 0.02  | Furan, 2-pentyl-                              |
| 14           | 24.487 | 0.35  | Hexanoic acid, ethyl ester                    |
| 15           | 27.371 | 0.05  | Butanoic acid. 2-methyl-, 3-methyl            |
| 16           | 27.548 | 0.04  | 2-Propanol                                    |
| 17           | 27.782 | 0.03  | 2-Furylmethyl formate                         |

|    |        |      |                                                                            |
|----|--------|------|----------------------------------------------------------------------------|
| 18 | 28.872 | 0.08 | 4D-Methylhexanoic acid ethyl ester                                         |
| 19 | 30.133 | 0.17 | Pyrazine, 2,5-dimethyl-                                                    |
| 20 | 30.959 | 0.03 | Ethyl heptanoate                                                           |
| 21 | 31.124 | 0.44 | Cyclohexasiloxane, dodecamethyl-                                           |
| 22 | 31.390 | 0.09 | Ethyl 2-hydroxypropanoate                                                  |
| 23 | 32.278 | 0.06 | 1-Hexanol                                                                  |
| 24 | 32.465 | 0.03 | Tetradecane, 2,6,10-trimethyl-                                             |
| 25 | 32.752 | 0.08 | 2-[2-(Methoxy)ethyl]-4(5)-methylim idazole                                 |
| 26 | 35.256 | 0.03 | Undecane                                                                   |
| 27 | 35.487 | 0.26 | Pyrazine, trimethyl-                                                       |
| 28 | 37.449 | 0.25 | Octanoic acid, ethyl ester                                                 |
| 29 | 37.974 | 0.03 | 2-Furanmethanol, 5-ethenyltetrahydro-.alpha., .alpha.,5-trimethyl-, trans- |
| 30 | 38.428 | 0.04 | 1-Octen-3-ol                                                               |
| 31 | 38.814 | 0.31 | 2-Furan-carboxaldehyde                                                     |
| 32 | 39.151 | 0.02 | 2-Amino-6-ethyl-3-methylpyridine                                           |
| 33 | 40.005 | 1.98 | Pyrazine, tetramethyl-                                                     |
| 34 | 41.451 | 0.04 | (3E,5E)-Hepta-3,5-dien-2-one                                               |
| 35 | 41.798 | 0.37 | Tetradecamethylcycloheptasiloxane                                          |
| 36 | 42.427 | 0.16 | 2,3,5-Trimethyl-6-ethylpyrazine                                            |
| 37 | 42.530 | 0.19 | Benzaldehyde                                                               |
| 38 | 43.743 | 0.09 | Nonanoic acid, ethyl ester                                                 |
| 39 | 43.869 | 0.12 | 2,3-Butanediol                                                             |
| 40 | 44.072 | 0.06 | 4-Heptanol, 2,6-dimethyl-                                                  |
| 41 | 44.371 | 0.13 | Cyclohexene, 1-methyl-4-(1-methylethylidene)-                              |

|    |        |      |                                                             |
|----|--------|------|-------------------------------------------------------------|
| 42 | 45.562 | 0.11 | 2-Furancarboxaldehyde, 5-methyl-                            |
| 43 | 45.787 | 0.03 | (2S,6S)-Bicyclo[2.2.2]octane-2,6-diol                       |
| 44 | 46.074 | 0.30 | 2,3-Butanediol                                              |
| 45 | 46.904 | 0.03 | 5-Epi-13-Acetoxy-14,15-di-nor-ent-haliman-18,10.beta.-olide |
| 46 | 47.021 | 0.05 | Undecanoic acid, ethyl ester                                |
| 47 | 47.542 | 0.03 | Cyclohexanone, 4-hydroxy-4-methyl-                          |
| 48 | 47.712 | 0.08 | Butane, 1-(ethenyloxy)-                                     |
| 49 | 47.819 | 0.03 | Ether, 2-chloro-1-propyl isopropyl                          |
| 50 | 47.918 | 0.05 | Propanoic acid, 2-methyl-                                   |
| 51 | 48.067 | 0.31 | 2-Cyclopenten-1-one, 3,5,5-trimethyl-                       |
| 52 | 48.705 | 0.07 | 5-Methyloxazolidine                                         |
| 53 | 49.637 | 0.15 | Benzeneacetaldehyde                                         |
| 54 | 49.800 | 0.21 | Decanoic acid, ethyl ester                                  |
| 55 | 50.030 | 0.13 | 1,3-Cyclohexadiene-1-carboxaldehyde, 2,6,6-trimethyl-       |
| 56 | 50.289 | 0.09 | Perfluoropropionic acid                                     |
| 57 | 50.793 | 0.25 | 2-Furanmethanol                                             |
| 58 | 51.183 | 0.14 | Benzoic acid, ethyl ester                                   |
| 59 | 51.600 | 0.03 | 3,4-Dihydroxyphenylglycol                                   |
| 60 | 51.794 | 0.43 | Butanedioic acid, diethyl ester                             |
| 61 | 52.940 | 0.31 | Butanoic acid, 3-methyl-                                    |
| 62 | 53.12  | 0.23 | Thiazole, 4,5-dihydro-2-methyl-                             |
| 63 | 55.591 | 0.04 | Alpha.-D-Xylofuranose, cyclic 1,2:3,5-bis(butylboronate)    |
| 64 | 57.165 | 0.15 | Methyl salicylate                                           |
| 65 | 57.809 | 0.59 | Benzeneacetic acid, ethyl ester                             |

|    |        |      |                                                       |
|----|--------|------|-------------------------------------------------------|
| 66 | 59.420 | 0.38 | Acetic acid, 2-phenylethyl ester                      |
| 67 | 61.127 | 0.83 | Dodecanoic acid, ethyl ester                          |
| 68 | 61.609 | 0.08 | Phenol, 2-methoxy-                                    |
| 69 | 62.584 | 0.09 | Benzenemethanol                                       |
| 70 | 63.058 | 0.12 | Fumaric acid, 2-phenethyl 2,2-dichloroethyl ester     |
| 71 | 64.427 | 3.12 | Benzeneethanol                                        |
| 72 | 65.305 | 0.10 | Benzeneacetaldehyde, .alpha. -ethylidene-             |
| 73 | 65.948 | 0.07 | 3-Buten-2-one, 4-(2,6,6-trimethyl-1-cyclohexen-1-yl)- |
| 74 | 66.806 | 0.05 | 2-Butanone, 4-(1-piperidinyl)-                        |
| 75 | 67.347 | 0.34 | Ethanone, 1-(1H-pyrrol-2-yl)-                         |
| 76 | 67.815 | 0.30 | Maltol                                                |
| 77 | 69.106 | 0.20 | Tetradecanoic acid, ethyl ester                       |
| 78 | 70.233 | 1.60 | Benzeneethanol, 2-methoxy-                            |
| 79 | 71.017 | 0.06 | 12-Crown-4                                            |
| 80 | 71.482 | 2.39 | Tetradecanoic acid, ethyl ester                       |
| 81 | 72.892 | 0.04 | Propanoic acid, ethyl ester                           |
| 82 | 73.644 | 0.08 | 1H-Pyrrole-2-carboxaldehyde, 1-methyl-                |
| 83 | 74.041 | 0.82 | Pentadecanoic acid, ethyl ester                       |
| 84 | 74.755 | 0.83 | Ethyl tridecanoate                                    |
| 85 | 76.149 | 0.29 | Thiophene, 3-ethyl-                                   |
| 86 | 76.333 | 0.14 | Pentadecanoic acid, ethyl ester                       |
| 87 | 77.058 | 0.58 | Phenol, 4-ethyl-                                      |
| 88 | 77.344 | 0.02 | 15-Crown-5                                            |
| 89 | 77.742 | 0.03 | 1-Benzothiophene-3-carbonitrile, 4,5,6,7-tetrahydro-  |

|              |        |       |                                                                  |
|--------------|--------|-------|------------------------------------------------------------------|
| 90           | 77.945 | 0.05  | 4-Vinyl-2-methoxy-phenol                                         |
| 91           | 78.77  | 21.09 | Hexadecanoic acid, ethyl ester                                   |
| 92           | 79.019 | 0.14  | Diethyl azelate                                                  |
| 93           | 79.28  | 0.22  | Hexadecanoic acid, methyl ester                                  |
| 94           | 82.123 | 0.60  | Ethyl 9-hexadecenoate                                            |
| 95           | 83.31  | 0.27  | Heptadecanoic acid, ethyl ester                                  |
| 96           | 84.577 | 0.11  | 2(4H)-Benzofuranone, 5,6,7,7a-tetrahydro-4,4,7a-trimethyl-, (R)- |
| 97           | 89.088 | 1.80  | 1,4,7,10,13,16-Hexaoxacyclooctadecane                            |
| 98           | 89.731 | 0.91  | Octadecanoic acid, ethyl ester                                   |
| 99           | 90.534 | 6.35  | Ethyl (9Z)-9-octadecenoate                                       |
| 100          | 90.862 | 0.69  | (E)-9-Octadecenoic acid ethyl este                               |
| 101          | 91.044 | 0.29  | Methyl 10-trans,12-cis-octadecadienoate                          |
| 102          | 92.45  | 17.75 | Linoleic acid ethyl ester                                        |
| 103          | 94.473 | 3.07  | Ethyl 9,12,15-octadecatrienoate                                  |
| <b>Go-28</b> |        |       |                                                                  |
| 1            | 7.672  | 0.91  | Acetic acid ethyl ester                                          |
| 2            | 7.948  | 0.16  | 1,2-Ethanediol, monoformate                                      |
| 3            | 8.483  | 0.08  | Butanal, 3-methyl-                                               |
| 4            | 9.097  | 7.30  | Ethanol                                                          |
| 5            | 14.699 | 0.12  | Butanoic acid, 3-methyl-, ethyl ester                            |
| 6            | 15.62  | 0.10  | Tetradecane, 4-methyl-                                           |
| 7            | 15.795 | 0.07  | Hexadecane, 2,6,10,14-tetramethyl-                               |
| 8            | 15.893 | 0.15  | 1-Propanol, 2-methyl-                                            |
| 9            | 16.041 | 0.12  | Pentatriacontane                                                 |



|    |        |      |                                           |
|----|--------|------|-------------------------------------------|
| 10 | 17.132 | 0.06 | Propanedioic acid, acetyl-, diethyl ester |
| 11 | 17.572 | 0.19 | Tetracosane, 2,6,10,15,19,23-hexamethyl-  |
| 12 | 18.134 | 0.13 | Octane, 2,2-dimethyl-                     |
| 13 | 18.468 | 0.10 | 2-(2-Hexyloxyethoxy)ethanol               |
| 14 | 18.740 | 0.07 | 1-Butanol, 4-butoxy-                      |
| 15 | 19.395 | 0.10 | Hexadecane, 3-methyl-                     |
| 16 | 19.763 | 0.09 | 9-Methylheptadecane                       |
| 17 | 19.915 | 0.24 | Cyclopentasiloxane, decamethyl-           |
| 18 | 20.364 | 0.05 | Heptadecane, 4-methyl-                    |
| 19 | 22.371 | 0.09 | Dodecane                                  |
| 20 | 22.787 | 0.10 | 1-Butanol, 2-methyl-                      |
| 21 | 22.865 | 0.42 | 1-Butanol, 3-methyl-                      |
| 22 | 24.251 | 0.09 | Furan, 2-pentyl-                          |
| 23 | 24.483 | 0.30 | Ethyl hexanoate                           |
| 24 | 27.525 | 0.19 | 2-Butanone, 3-hydroxy-                    |
| 25 | 27.946 | 0.04 | Octanal                                   |
| 26 | 28.808 | 0.16 | Tridecane                                 |
| 27 | 30.127 | 0.12 | Pyrimidine, 4,6-dimethyl-                 |
| 28 | 30.952 | 0.04 | Ethyl heptanoate                          |
| 29 | 31.117 | 1.28 | Cyclohexasiloxane, dodecamethyl-          |
| 30 | 31.381 | 0.05 | 2-Butanol                                 |
| 31 | 32.272 | 0.08 | 1-Pentanol, 4-methyl-                     |
| 32 | 32.470 | 0.10 | Tridecane, 2-methyl-                      |
| 33 | 35.261 | 0.23 | Tetradecane                               |

|    |        |       |                                                       |
|----|--------|-------|-------------------------------------------------------|
| 34 | 35.482 | 0.58  | Pyrazine, trimethyl-                                  |
| 35 | 37.445 | 0.19  | Octanoic acid, ethyl ester                            |
| 36 | 38.424 | 0.19  | 1-Octen-3-ol                                          |
| 37 | 38.809 | 0.38  | 2-Furan-carboxaldehyde                                |
| 38 | 39.146 | 0.21  | 2,3-Dimethyl-5-ethylpyrazine                          |
| 39 | 40.006 | 11.54 | 2,3,5,6 Tetramethyl pyrazine                          |
| 40 | 41.794 | 1.41  | Cycloheptasiloxane, tetradecamethyl-                  |
| 41 | 42.422 | 0.41  | 2,3,5-Trimethyl-6-ethylpyrazine                       |
| 42 | 42.528 | 0.30  | Benzaldehyde                                          |
| 43 | 43.742 | 0.10  | Nonanoic acid, ethyl ester                            |
| 44 | 43.860 | 0.26  | 2,3-Butanediol                                        |
| 45 | 44.366 | 0.11  | Cyclofenchene                                         |
| 46 | 45.569 | 0.06  | 2-Furancarboxaldehyde, 5-methyl-                      |
| 47 | 45.709 | 0.07  | 1,3-Dihydrobenzimidazol-2-one                         |
| 48 | 46.063 | 0.28  | 2,3-Butanediol                                        |
| 49 | 46.884 | 0.12  | 6-Methyl-3,5-heptadiene-2-one                         |
| 50 | 47.019 | 0.06  | Hexadecanoic acid, ethyl ester                        |
| 51 | 47.544 | 0.15  | Cyclohexanol, 2,6-dimethyl-                           |
| 52 | 48.059 | 0.23  | Ethyl 2-hydroxybutyrate                               |
| 53 | 48.641 | 0.11  | (1R,2S,4R)-1,2-Epoxy-p-menth-8-ene                    |
| 54 | 49.625 | 0.51  | Benzeneacetaldehyde                                   |
| 55 | 50.026 | 0.31  | 1,3-Cyclohexadiene-1-carboxaldehyde, 2,6,6-trimethyl- |
| 56 | 50.791 | 0.54  | 2-Furanmethanol                                       |
| 57 | 51.180 | 0.20  | Benzoic acid, ethyl ester                             |

|    |        |       |                                                                               |
|----|--------|-------|-------------------------------------------------------------------------------|
| 58 | 51.601 | 0.19  | Hexadecamethylcyclooctasiloxane                                               |
| 59 | 51.829 | 0.05  | 2-Isopropylimidazole                                                          |
| 60 | 52.61  | 0.09  | 2,6,6-Trimethyl-2-cyclohexene-1,4-dione                                       |
| 61 | 52.935 | 0.04  | 5-Hydroxy-6-methoxy-8-[(4-amino-1-methylbutyl)amino]quinoline trihydrobromide |
| 62 | 53.121 | 0.05  | 2-(4-Methyl-3-cyclohexen-1-yl)-2-propanol                                     |
| 63 | 57.805 | 0.27  | Ethylphenyl acetate                                                           |
| 64 | 59.729 | 0.07  | Silanediol, dimethyl-                                                         |
| 65 | 61.126 | 0.25  | Dodecanoic acid, ethyl ester                                                  |
| 66 | 61.607 | 0.13  | Phenol, 2-methoxy-                                                            |
| 67 | 64.421 | 0.71  | Phenylethyl alcohol                                                           |
| 68 | 65.954 | 0.10  | 3-Buten-2-one, 4-(2,6,6-trimethyl-1-cyclohexen-1-yl)-                         |
| 69 | 67.344 | 0.37  | Ethanone, 1- (1H-pyrrol-2-yl)-                                                |
| 70 | 67.839 | 0.20  | Maltol                                                                        |
| 71 | 70.234 | 11.23 | Guaiacol, 4-ethyl-                                                            |
| 72 | 71.477 | 0.98  | Tetradecanoic acid, ethyl ester                                               |
| 73 | 74.039 | 0.29  | Pentadecanoic acid, ethyl ester                                               |
| 74 | 74.758 | 0.25  | Methyl 2,12-dimethyltetradecanoate                                            |
| 75 | 76.34  | 0.12  | 3,6,9,12,15-Pentaoxanonadecan-1-ol                                            |
| 76 | 77.061 | 0.78  | Phenol, 4-ethyl-                                                              |
| 77 | 77.932 | 6.35  | 2-Methoxy-4-vinylphenol                                                       |
| 78 | 78.773 | 0.06  | Octaethylene glycol monododecyl ether                                         |
| 79 | 79.148 | 0.47  | Sorbic acid                                                                   |
| 80 | 79.278 | 1.66  | Hexadecanoic acid, methyl ester                                               |
| 81 | 80.982 | 13.62 | Hexadecanoic acid, ethyl ester                                                |

|              |        |       |                                               |
|--------------|--------|-------|-----------------------------------------------|
| 82           | 82.117 | 0.40  | Ethyl 9-hexadecenoate                         |
| 83           | 84.58  | 0.27  | Dihydroactinidiolide                          |
| 84           | 86.487 | 0.38  | Benzofuran, 2,3-dihydro-                      |
| 85           | 88.115 | 2.63  | 1,4,7,10,13,16-Hexaoxacyclooctane             |
| 86           | 89.728 | 0.66  | Octadecanoic acid, ethyl ester                |
| 87           | 90.52  | 5.44  | Ethyl oleate                                  |
| 88           | 91.042 | 1.25  | 9,12-Octadecadienoic acid (Z,Z)-,methyl ester |
| 89           | 92.429 | 16.02 | Linoleic acid ethyl ester                     |
| 90           | 94.469 | 2.86  | Ethyl 9,12,15-octadecatrienoate               |
| <b>Go-29</b> |        |       |                                               |
| 1            | 8.485  | 0.82  | Butanal, 3-methyl-                            |
| 2            | 9.100  | 1.17  | Ethanol                                       |
| 3            | 15.311 | 1.91  | Hexanal                                       |
| 4            | 15.899 | 0.28  | 1-Propanol, 2-methyl-                         |
| 5            | 19.924 | 1.40  | Cyclopentasiloxane, decamethyl-               |
| 6            | 21.154 | 0.36  | 2-Heptanone                                   |
| 7            | 21.307 | 0.59  | N Heptanal                                    |
| 8            | 22.793 | 0.31  | 1-Butanol, 2-methyl-                          |
| 9            | 22.871 | 1.04  | 1-Pentanol                                    |
| 10           | 23.295 | 0.28  | 2-Hexenal, (E)-                               |
| 11           | 23.502 | 0.28  | N-Hydroxymethylacetamide                      |
| 12           | 24.256 | 1.37  | Furan, 2-pentyl-                              |
| 13           | 25.578 | 0.93  | 1,3,6-Octatriene, 3,7-dimethyl-, (E)-         |
| 14           | 25.745 | 0.48  | Benzene, ethenyl-                             |

|    |        |      |                                                 |
|----|--------|------|-------------------------------------------------|
| 15 | 27.952 | 0.49 | Octanal                                         |
| 16 | 30.141 | 1.56 | 2-Heptenal, (E)-                                |
| 17 | 31.12  | 8.18 | Cyclohexasiloxane, dodecamethyl-                |
| 18 | 32.276 | 2.32 | 1-Hexanol                                       |
| 19 | 32.476 | 0.34 | Eicosane, 10-methyl-                            |
| 20 | 34.457 | 0.35 | 2-Nonanone                                      |
| 21 | 34.722 | 1.48 | Nonanal                                         |
| 22 | 35.267 | 0.32 | Nonane                                          |
| 23 | 36.089 | 0.53 | (3Z)-3-Ethyl-2-methyl-1,3-hexadien              |
| 24 | 36.929 | 1.21 | 3-Dodecen-1-al                                  |
| 25 | 38.429 | 1.27 | 1-Octen-3-ol                                    |
| 26 | 38.812 | 2.08 | 2-Furan-carboxaldehyde                          |
| 27 | 39.060 | 0.51 | Ethylcyclohex-1-ene                             |
| 28 | 40.002 | 0.97 | Pyrazine, tetramethyl-                          |
| 29 | 40.837 | 1.17 | 2,4-Heptadienal, (E,E)-                         |
| 30 | 41.444 | 1.56 | Ethanone, 1-(2-furanyl)-                        |
| 31 | 41.792 | 8.05 | Tetradecamethylcycloheptasiloxane               |
| 32 | 42.529 | 2.96 | Benzaldehyde                                    |
| 33 | 43.529 | 0.62 | (E)-Non-2 enal                                  |
| 34 | 43.865 | 0.20 | Oxirane, (methoxymethyl)-                       |
| 35 | 44.368 | 1.47 | Cyclohexene, 1-methyl-4-(1-methylethylidene)-   |
| 36 | 45.058 | 0.56 | Orcinol                                         |
| 37 | 45.566 | 0.38 | 2-Furancarboxaldehyde, 5-methyl-                |
| 38 | 46.142 | 2.73 | 1-(1'-Hydroxycyclopentyl)-1-hydroxycyclopentane |

|              |        |       |                                                                  |
|--------------|--------|-------|------------------------------------------------------------------|
| 39           | 46.893 | 0.75  | 2(1H)-Pyridinone, hydrazone                                      |
| 40           | 47.532 | 0.80  | Cyclohexanol, 2,6-dimethyl-                                      |
| 41           | 48.635 | 0.73  | 1-Cyclohexene-1-carboxaldehyde,6,6-trimethyl-                    |
| 42           | 49.084 | 0.37  | (S)(+)-Z-13-Methyl-11-pentadecen-1-ol acetate                    |
| 43           | 49.65  | 1.98  | Benzeneacetaldehyde                                              |
| 44           | 50.026 | 1.09  | 1,3-Cyclohexadiene-1-carboxaldehyde, 2,6,6-trimethyl-            |
| 45           | 50.618 | 7.88  | Butanoic acid                                                    |
| 46           | 51.194 | 0.76  | Hexanoic acid                                                    |
| 47           | 51.597 | 3.18  | Cyclooctasiloxane, hexadecamethyl-                               |
| 48           | 52.611 | 0.41  | Cyclopentanone, 4,4-dimethyl-2-(1-methylethenyl)-                |
| 49           | 53.132 | 0.37  | 3-Cyclohexene-1-methanol, .alpha.,.alpha.,4-trimethyl-           |
| 50           | 59.162 | 1.91  | 2,4-Decadienal, (E,E)-                                           |
| 51           | 59.706 | 0.30  | Silanediol, dimethyl-                                            |
| 52           | 60.349 | 0.45  | Cyclononasiloxane, octadecamethyl-                               |
| 53           | 64.424 | 2.32  | Benzeneethanol                                                   |
| 54           | 65.957 | 0.66  | 3-Buten-2-one, 4-(2,6,6-trimethyl-1-cyclohexen-1-yl)-            |
| 55           | 67.35  | 0.76  | Ethanone, 1- (1H-pyrrol-2-yl)-                                   |
| 56           | 77.931 | 1.05  | 2-Methoxy-5-vinylphenol                                          |
| 57           | 84.574 | 1.26  | 2(4H)-Benzofuranone, 5,6,7,7a-tetrahydro-4,4,7a-trimethyl-, (R)- |
| 58           | 95.535 | 20.44 | 1,4,7,10,13,16-Hexaoxacyclooctadecane                            |
| <b>Go-30</b> |        |       |                                                                  |
| 1            | 7.947  | 0.15  | 2-Pentanamine                                                    |
| 2            | 8.478  | 0.14  | 1,2-Ethanediamine, N,N'-dimethyl-                                |
| 3            | 9.095  | 9.62  | Ethanol                                                          |

|    |        |       |                                                               |
|----|--------|-------|---------------------------------------------------------------|
| 4  | 15.907 | 1.11  | 1-Propanol, 2-methyl-                                         |
| 5  | 19.921 | 0.35  | Cyclopentasiloxane, decamethyl-                               |
| 6  | 22.173 | 0.18  | Oxazole, trimethyl-                                           |
| 7  | 22.796 | 0.93  | 1-Butanol, 2-methyl-                                          |
| 8  | 22.875 | 3.16  | 1-Butanol, 3-methyl-                                          |
| 9  | 24.253 | 0.08  | Furan, 2-pentyl-                                              |
| 10 | 25.732 | 1.05  | Benzene, ethenyl-                                             |
| 11 | 27.531 | 1.01  | 2-Butanone, 3-hydroxy-                                        |
| 12 | 27.948 | 0.07  | 2-Methylcyclopropylmethanol                                   |
| 13 | 30.133 | 0.10  | Pyrazine, 2,6-dimethyl-                                       |
| 14 | 31.123 | 1.86  | Cyclohexasiloxane, dodecamethyl-                              |
| 15 | 32.278 | 0.15  | 1-Hexanol                                                     |
| 16 | 32.473 | 0.09  | Methoxyacetic acid, 2-tridecyl ester                          |
| 17 | 35.267 | 0.07  | Undecane, 2-methyl-                                           |
| 18 | 35.486 | 0.77  | Pyrazine, trimethyl-                                          |
| 19 | 38.429 | 0.15  | 1-Octen-3-ol                                                  |
| 20 | 38.813 | 0.21  | 2-Furan-carboxaldehyde                                        |
| 21 | 39.151 | 0.46  | Pyrazine, 5-ethyl-2,3-dimethyl-                               |
| 22 | 40.032 | 51.59 | 2,3,5,6 Tetramethyl pyrazine                                  |
| 23 | 41.449 | 0.19  | Ethanone, 1- (2-furanyl)-                                     |
| 24 | 41.792 | 2.36  | Tetradecamethylcycloheptasiloxane                             |
| 25 | 42.422 | 2.47  | 2,3,5-Trimethyl-6-ethylpyrazine                               |
| 26 | 43.867 | 0.25  | 2,3-Butanediol                                                |
| 27 | 44.225 | 0.13  | 4H-Pyrido[1,2-a]pyrimidin-4-one, 6,7,8,9-tetrahydro-6-methyl- |

|    |        |      |                                                                  |
|----|--------|------|------------------------------------------------------------------|
| 28 | 44.368 | 0.16 | L-Linalool                                                       |
| 29 | 45.708 | 0.14 | 1H-1,2,3-Benzotriazol-4-amine                                    |
| 30 | 46.067 | 1.64 | 2,3-Butanediol                                                   |
| 31 | 46.270 | 0.21 | Propane, 1,1'-oxybis 2-chloro-                                   |
| 32 | 46.537 | 0.31 | Pyrazine, trimethylpropyl-                                       |
| 33 | 47.542 | 0.09 | Oxalic acid, hexyl neopentyl ester                               |
| 34 | 49.635 | 0.24 | Phenyl acetaldehyde                                              |
| 35 | 50.028 | 0.09 | Acetamide, N-(2-pyridinylmethyl)-, conjugate monoacid            |
| 36 | 50.791 | 0.34 | 2- Furanmethanol                                                 |
| 37 | 51.194 | 0.22 | Methyl 1-methyl-2-propyl-1-cyclopropene-3-carboxylate            |
| 38 | 51.598 | 0.67 | Cyclooctasiloxane, hexadecamethyl-                               |
| 39 | 51.828 | 0.08 | 2-Furancarboxamide, N-methyl-                                    |
| 40 | 57.164 | 1.74 | Methyl salicylate                                                |
| 41 | 59.696 | 0.09 | Silanediol, dimethyl-                                            |
| 42 | 60.350 | 0.07 | Cyclononasiloxane, octadecamethyl-                               |
| 43 | 60.416 | 0.09 | 2-Butanone, 4-(2,6,6-trimethyl-1-cyclohexen-1-yl)-               |
| 44 | 61.599 | 0.17 | Phenol, 2-methoxy-                                               |
| 45 | 64.420 | 4.27 | Benzeneethanol                                                   |
| 46 | 70.950 | 0.08 | 1,6-Octadiene, 7-methyl-3-methylene-                             |
| 47 | 71.478 | 0.08 | Pentadecanoic acid, ethyl ester                                  |
| 48 | 76.346 | 0.14 | 3,4-Pyridinediamine                                              |
| 49 | 77.928 | 7.20 | 2-Methoxy-4-vinylphenol                                          |
| 50 | 80.973 | 0.61 | Hexadecanoic acid, ethyl ester                                   |
| 51 | 84.577 | 0.34 | 2(4H)-Benzofuranone, 5,6,7,7a-tetrahydro-4,4,7a-trimethyl-, (R)- |



|              |        |       |                                                     |
|--------------|--------|-------|-----------------------------------------------------|
| 52           | 86.472 | 1.83  | 4-Vinylphenol                                       |
| 53           | 92.411 | 0.41  | 1,4,7,10,13,16-Hexaoxacyclooctadecane               |
| <b>Go-31</b> |        |       |                                                     |
| 1            | 7.673  | 1.31  | Acetic acid ethyl ester                             |
| 2            | 7.956  | 0.22  | 2-Methyl-1,3-dioxolan-4-one                         |
| 3            | 9.129  | 26.62 | Ethanol                                             |
| 4            | 16.101 | 0.11  | Ethanol, 2-ethoxy-                                  |
| 5            | 19.912 | 0.14  | N-(4'-Chlorophenyl)-8-fluoro-3-methyl-isoalloxazine |
| 6            | 22.906 | 0.26  | Oxirane, 2-(1,1-dimethylethyl)-3-methyl-            |
| 7            | 24.238 | 0.08  | Furan, 2-pentyl-                                    |
| 8            | 24.478 | 0.66  | Hexanoic acid, ethyl ester                          |
| 9            | 27.569 | 0.07  | Ethanol, 2-(vinylloxy)-                             |
| 10           | 27.947 | 0.05  | 1,3-Dioxolane, 2-methyl-                            |
| 11           | 28.799 | 0.06  | Methoxyacetic acid, 2-tridecyl ester                |
| 12           | 29.787 | 0.12  | 1-Butanol                                           |
| 13           | 30.948 | 0.09  | Heptanoic acid, ethyl ester                         |
| 14           | 31.121 | 0.85  | Cyclohexasiloxane, dodecamethyl-                    |
| 15           | 31.400 | 0.12  | Ethyl 2-hydroxypropanoate                           |
| 16           | 32.280 | 0.14  | 1-Hexanol                                           |
| 17           | 32.464 | 0.13  | Dodecane, 3-methyl-                                 |
| 18           | 34.068 | 0.05  | Butanoic acid, 3-methyl-, hexyl ester               |
| 19           | 35.258 | 0.10  | Nonadecane                                          |
| 20           | 35.492 | 0.05  | Pyrazine, trimethyl-                                |
| 21           | 36.928 | 0.06  | (E)-1-(Methoxymethoxy)-1-octene-3-ol                |

|    |        |      |                                                       |
|----|--------|------|-------------------------------------------------------|
| 22 | 37.445 | 0.43 | Octanoic acid, ethyl ester                            |
| 23 | 38.426 | 0.07 | 1-Octen-3-ol                                          |
| 24 | 38.813 | 0.71 | Furfural                                              |
| 25 | 39.676 | 0.08 | (4E)-4-Methyl-4-decene                                |
| 26 | 40.000 | 0.33 | Pyrazine, tetramethyl-                                |
| 27 | 40.877 | 0.17 | Ethyl tridecanoate                                    |
| 28 | 41.792 | 1.08 | Cycloheptasiloxane, tetradecamethyl-                  |
| 29 | 42.529 | 0.36 | Benzaldehyde                                          |
| 30 | 43.738 | 0.23 | Nonanoic acid, ethyl ester                            |
| 31 | 44.373 | 0.11 | Cyclohexene, 1-methyl-4-(1-methylethylidene)-         |
| 32 | 44.921 | 0.05 | Methoxyacetic acid, 4-tridecyl ester                  |
| 33 | 45.573 | 0.11 | 3,5-Octadien-2-one                                    |
| 34 | 46.070 | 0.18 | 2,3-Butanediol                                        |
| 35 | 46.885 | 0.20 | 6-Methyl-3,5-heptadiene-2-one                         |
| 36 | 47.019 | 0.26 | Heptadecanoic acid, ethyl ester                       |
| 37 | 47.541 | 0.13 | Cyclohexanol, 2,6-dimethyl-                           |
| 38 | 48.059 | 0.74 | Neopentylidenecyclohexane                             |
| 39 | 48.628 | 0.14 | 1-Cyclohexene-1-carboxaldehyde, 2,6,6-trimethyl-      |
| 40 | 49.628 | 0.21 | Phenyl acetaldehyde                                   |
| 41 | 49.799 | 0.30 | Decanoic acid, ethyl ester                            |
| 42 | 50.021 | 0.43 | 1,3-Cyclohexadiene-1-carboxaldehyde, 2,6,6-trimethyl- |
| 43 | 50.291 | 0.33 | Silanediol, dimethyl-                                 |
| 44 | 50.791 | 0.26 | 2- Furanmethanol                                      |
| 45 | 51.18  | 0.21 | Benzoic acid, ethyl ester                             |

|    |        |      |                                                                  |
|----|--------|------|------------------------------------------------------------------|
| 46 | 51.599 | 0.34 | Hexadecamethylcyclooctasiloxane                                  |
| 47 | 51.803 | 0.13 | Butanedioic acid, diethyl ester                                  |
| 48 | 52.933 | 0.27 | Gamma-Himachalene                                                |
| 49 | 53.124 | 0.07 | 1,4-Cyclohexadiene, 1-methyl-4-(1-methylethyl)-                  |
| 50 | 57.166 | 0.85 | Methyl salicylate                                                |
| 51 | 57.804 | 0.17 | Benzeneacetic acid, ethyl ester                                  |
| 52 | 59.152 | 0.09 | 2,4-Decadienal, (E,E)-                                           |
| 53 | 59.702 | 0.04 | Silanediol, dimethyl-                                            |
| 54 | 60.348 | 0.05 | Cyclopentadecasiloxane, triacontamethyl-                         |
| 55 | 61.127 | 1.37 | Dodecanoic acid, ethyl ester                                     |
| 56 | 61.600 | 0.17 | Gamma, gamma-Dimethylallenyl -                                   |
| 57 | 64.418 | 0.40 | Benzeneethanol                                                   |
| 58 | 65.953 | 0.32 | 3-Buten-2-one, 4-(2,6,6-trimethyl-1-cyclohexen-1-yl)-            |
| 59 | 66.803 | 0.15 | Pentanoic acid, 3-acetyl-4-oxo-, ethyl ester                     |
| 60 | 67.348 | 0.33 | Ethanone, 1-(1H-pyrrol-2-yl)-                                    |
| 61 | 68.566 | 0.10 | 3-Buten-2-one, 4-(2,2,6-trimethyl-7-oxabicyclo[4.1.0]hept-1-yl)- |
| 62 | 69.542 | 0.08 | Myristic acid, methyl ester                                      |
| 63 | 70.219 | 0.18 | 2(3H)-Furanone, dihydro-5-pentyl-                                |
| 64 | 70.955 | 0.15 | 1,6,10-Dodecatrien-3-ol, 3,7,11-trimethyl-                       |
| 65 | 71.480 | 3.65 | Tetradecanoic acid, ethyl ester                                  |
| 66 | 72.448 | 1.82 | 1,4,7,10,13,16-Hexaoxacyclooctadecane                            |
| 67 | 74.041 | 0.43 | Ethyl 13-methyl-tetradecanoate                                   |
| 68 | 74.758 | 0.11 | Ethyl 15-methyl-hexadecanoate                                    |
| 69 | 76.335 | 0.20 | Pentadecanoic acid, ethyl ester                                  |

|              |        |       |                                                                  |
|--------------|--------|-------|------------------------------------------------------------------|
| 70           | 77.932 | 0.86  | 2-Methoxy-4-vinylphenol                                          |
| 71           | 79.019 | 0.16  | Diethyl azelate                                                  |
| 72           | 79.280 | 0.66  | Hexadecanoic acid, methyl ester                                  |
| 73           | 80.995 | 20.81 | Hexadecanoic acid, ethyl ester                                   |
| 74           | 82.121 | 0.87  | Ethyl 9-hexadecenoate                                            |
| 75           | 84.576 | 0.53  | 2(4H)-Benzofuranone, 5,6,7,7a-tetrahydro-4,4,7a-trimethyl-, (R)- |
| 76           | 86.473 | 0.26  | Benzofuran, 2,3-dihydro-                                         |
| 77           | 89.730 | 0.51  | Octadecanoic acid. ethyl ester                                   |
| 78           | 90.524 | 4.03  | (E)-9-Octadecenoic acid ethyl ester                              |
| 79           | 91.040 | 0.87  | 9,12-Octadecadienoic acid, methyl ester                          |
| 80           | 92.435 | 17.12 | Linoleic acid ethyl ester                                        |
| 81           | 94.469 | 3.41  | 9,12,15-Octadecatrienoic acid, ethyl ester, (Z,Z,Z)-             |
| <b>Go-32</b> |        |       |                                                                  |
| 1            | 6.459  | 0.12  | Acetic acid, methyl ester                                        |
| 2            | 7.674  | 1.99  | Acetic acid ethyl ester                                          |
| 3            | 7.950  | 0.18  | 1,2-Hydrazinedicarboxaldehyde                                    |
| 4            | 8.363  | 0.09  | Butanal, 2-methyl-                                               |
| 5            | 8.485  | 0.18  | Butanal, 3-methyl-                                               |
| 6            | 9.103  | 6.36  | Ethanol                                                          |
| 7            | 15.282 | 0.03  | DL-Cystathionine                                                 |
| 8            | 15.922 | 0.10  | 1-Propanol, 2-methyl-                                            |
| 9            | 17.620 | 0.20  | 1-Butanol, 3-methyl-, acetate                                    |
| 10           | 19.922 | 0.11  | Cyclopentasiloxane, decamethyl-                                  |
| 11           | 22.874 | 0.37  | 1-Butanol, 3-methyl-                                             |

---

|    |        |      |                                        |
|----|--------|------|----------------------------------------|
| 12 | 24.256 | 0.08 | Furan, 2-pentyl-                       |
| 13 | 24.488 | 0.25 | Hexanoic acid., ethyl ester            |
| 14 | 25.559 | 0.05 | 1,3,6-Octatriene, 3,7-dimethyl-, (E)-  |
| 15 | 27.536 | 0.07 | 2-Butanone, 3-hydroxy-                 |
| 16 | 30.143 | 0.06 | (+)-5-Methyl-2 -hexanol                |
| 17 | 30.956 | 0.03 | Heptanoic acid, ethyl ester            |
| 18 | 31.122 | 0.58 | Cyclohexasiloxane, dodecamethyl-       |
| 19 | 31.382 | 0.16 | Ethyl 2-hydroxypropanoate              |
| 20 | 32.470 | 0.10 | Eicosane, 10-methyl-                   |
| 21 | 35.259 | 0.04 | Decane                                 |
| 22 | 36.920 | 0.09 | Benzene, 1,3-bis(1,1-dimethylethyl)-   |
| 23 | 37.447 | 0.29 | Octanoic acid, ethyl ester             |
| 24 | 38.426 | 0.04 | 1-Octen-3-ol                           |
| 25 | 38.815 | 3.50 | 2-Furan-carboxaldehyde                 |
| 26 | 39.379 | 0.65 | Acetic acid                            |
| 27 | 39.999 | 0.15 | 2,3,5,6 Tetramethyl pyrazine           |
| 28 | 40.885 | 0.21 | Ethyl 13-methyl-tetradecanoate         |
| 29 | 41.793 | 0.89 | Tetradecamethylcycloheptasiloxane      |
| 30 | 42.526 | 0.53 | Benzaldehyde                           |
| 31 | 43.739 | 0.08 | Nonanoic acid, ethyl ester             |
| 32 | 43.860 | 0.63 | 2,3-Butanediol, [R-(R@,R@)]-           |
| 33 | 44.369 | 0.42 | 1,6-Octadien-3-ol, 3,7-dimethyl-       |
| 34 | 44.924 | 0.04 | Methoxyacetic acid, 4-tetradecyl ester |
| 35 | 45.174 | 0.04 | Acetic acid, methoxy-, ethyl ester     |

---

|    |        |      |                                                                        |
|----|--------|------|------------------------------------------------------------------------|
| 36 | 45.542 | 0.14 | 2-Furancarboxaldehyde, 5-methyl-                                       |
| 37 | 46.062 | 0.30 | 2,3-Butanediol                                                         |
| 38 | 46.893 | 0.08 | 6-Methyl-3,5-heptadiene-2-one                                          |
| 39 | 47.021 | 0.23 | Undecanoic acid, ethyl ester                                           |
| 40 | 47.426 | 0.02 | Benzonitrile                                                           |
| 41 | 48.059 | 0.63 | Cyclopropane, ethyl(1,2,2-trimethylpropylidene)-, (Z)-                 |
| 42 | 48.544 | 0.04 | Benzoic acid, hydrazide                                                |
| 43 | 48.640 | 0.09 | 1-Cyclohexene-1-carboxaldehyde, 2,6,6-trimethyl-                       |
| 44 | 49.639 | 0.35 | Benzeneacetaldehyde                                                    |
| 45 | 49.795 | 0.28 | Decanoic acid, ethyl ester                                             |
| 46 | 50.028 | 0.35 | 1,3-Cyclohexadiene-1-carboxaldehyde, 2,6,6-trimethyl-                  |
| 47 | 50.276 | 0.17 | Silanediol, dimethyl-                                                  |
| 48 | 50.789 | 0.68 | 2-Furanmethanol                                                        |
| 49 | 51.179 | 0.23 | Benzoic acid, ethyl ester                                              |
| 50 | 51.598 | 0.30 | Cyclooctasiloxane, hexadecamethyl-                                     |
| 51 | 51.791 | 0.22 | Butanedioic acid, diethyl ester                                        |
| 52 | 52.926 | 0.04 | cis-(-)-2,4a,5,6,9a-Hexahydro-3,5,5,9-tetramethyl(1H)benzocycloheptene |
| 53 | 53.122 | 0.10 | Beta. Fenchyl alcohol                                                  |
| 54 | 57.162 | 1.51 | Methyl salicylate                                                      |
| 55 | 57.807 | 0.16 | Benzeneacetic acid, ethyl ester                                        |
| 56 | 58.904 | 0.06 | Dodecanoic acid, methyl ester                                          |
| 57 | 59.418 | 0.30 | Acetic acid, 2-phenylethyl ester                                       |
| 58 | 59.708 | 0.05 | Silanediol, dimethyl-                                                  |
| 59 | 59.848 | 0.05 | 2-Buten-1-one, 1-(2,6,6-trimethyl-1,3-cyclohexadien-1-yl)-, (E)-       |

|    |        |       |                                                       |
|----|--------|-------|-------------------------------------------------------|
| 60 | 61.127 | 0.90  | Dodecanoic acid, ethyl ester                          |
| 61 | 61.607 | 0.12  | Phenol, 2-methoxy-                                    |
| 62 | 62.582 | 0.11  | Benzenemethanol                                       |
| 63 | 64.420 | 1.94  | Benzeneethanol                                        |
| 64 | 65.305 | 0.07  | Benzeneacetaldehyde, .alpha.-ethylidene-              |
| 65 | 65.949 | 0.14  | 3-Buten-2-one, 4-(2,6,6-trimethyl-1-cyclohexen-1-yl)- |
| 66 | 67.339 | 0.17  | Ethanone, 1-(1H-pyrrol-2-yl)-                         |
| 67 | 69.543 | 0.18  | Myristic acid, methyl ester                           |
| 68 | 70.215 | 0.18  | 4-Pentylbutan-4-olide                                 |
| 69 | 71.017 | 0.06  | 2,5,5,8A-Tetramethyloctahydro-7H-chromen-7-one        |
| 70 | 71.480 | 2.62  | Tetradecanoic acid, ethyl ester                       |
| 71 | 74.044 | 0.15  | Pentadecanoic acid, ethyl ester                       |
| 72 | 76.330 | 0.11  | Ethyl 13-methyl-tetradecanoate                        |
| 73 | 77.932 | 0.38  | 2-Methoxy-4-vinylphenol                               |
| 74 | 79.278 | 1.77  | Hexadecanoic acid, methyl ester                       |
| 75 | 81.006 | 21.74 | Hexadecanoic acid, ethyl ester                        |
| 76 | 82.121 | 0.69  | Ethyl 9-hexadecenoate                                 |
| 77 | 84.575 | 0.22  | Dihydroactinidiolide                                  |
| 78 | 86.476 | 0.16  | 4-Vinylphenol                                         |
| 79 | 89.087 | 0.59  | 9-Octadecenoic acid, methyl ester                     |
| 80 | 89.731 | 0.76  | Octadecanoic acid, ethyl ester                        |
| 81 | 90.526 | 6.48  | Ethyl (9Z)-9-octadecenoate                            |
| 82 | 90.863 | 0.62  | Ethyl oleate                                          |
| 83 | 91.045 | 2.82  | 9,12-Octadecadienoic acid (Z,Z)-, methyl ester        |

|              |        |       |                                                       |
|--------------|--------|-------|-------------------------------------------------------|
| 84           | 92.451 | 27.11 | Linoleic acid ethyl ester                             |
| 85           | 94.472 | 2.90  | Ethyl 9,12,15-octadecatrienoate                       |
| 86           | 96.981 | 1.88  | 1,4,7,10,13,16-Hexaoxacyclooctadecane                 |
| <b>Go-33</b> |        |       |                                                       |
| 1            | 7.671  | 0.68  | Ethyl Acetate                                         |
| 2            | 7.956  | 0.08  | 1,2-Hydrazinedicarboxaldehyde                         |
| 3            | 8.366  | 0.03  | Butanal, 2-methyl-                                    |
| 4            | 8.486  | 0.06  | Butanal, 3-methyl-                                    |
| 5            | 9.165  | 36    | Ethanol                                               |
| 6            | 21.759 | 0.09  | Lyxopyranoside, methyl 2,3,4-tri-0-methyl-, .beta.-D- |
| 7            | 22.804 | 0.13  | 2-Methylbutan-1-ol                                    |
| 8            | 22.885 | 0.42  | 1-Butanol, 3-methyl-                                  |
| 9            | 24.481 | 0.07  | Hexanoic acid, ethyl ester                            |
| 11           | 27.544 | 0.05  | 2-Butanone, 3-hydroxy-                                |
| 11           | 31.121 | 0.34  | Cyclohexasiloxane, dodecamethyl-                      |
| 12           | 31.386 | 0.45  | Ethyl (s)-(-)-lactate                                 |
| 13           | 32.750 | 0.03  | (1H-Imidazol-4-yl)Oxoacetic acid                      |
| 14           | 37.444 | 0.12  | Octanoic acid, ethyl ester                            |
| 15           | 38.812 | 0.44  | 2-Furan-carboxaldehyde                                |
| 16           | 39.999 | 0.15  | Pyrazine, tetramethyl-                                |
| 17           | 40.093 | 0.08  | Diallyl disulphide                                    |
| 18           | 41.793 | 0.62  | Tetradecamethyl-cyclo-hepta-siloxane                  |
| 19           | 42.527 | 0.20  | Benzaldehyde                                          |
| 20           | 43.740 | 0.02  | Nonanoic acid, ethyl ester                            |



|    |        |      |                                                       |
|----|--------|------|-------------------------------------------------------|
| 21 | 43.861 | 0.22 | 2,3-Butanediol                                        |
| 22 | 44.063 | 0.03 | 2-Hexanol                                             |
| 23 | 44.372 | 0.02 | Hexan-2-ol                                            |
| 24 | 45.558 | 0.11 | 2-Furancarboxaldehyde, 5-methyl-                      |
| 25 | 46.065 | 0.49 | 2,3-Butanediol                                        |
| 26 | 46.884 | 0.08 | 6-Methyl-3, 5- heptadiene-2-one                       |
| 27 | 47.013 | 0.04 | Ethyl 13-methyl-tetradecanoate                        |
| 28 | 48.057 | 0.11 | Neopentylidenecyclohexane                             |
| 29 | 48.542 | 0.02 | Benzoic acid, methyl ester                            |
| 30 | 48.644 | 0.04 | 2-Acetoxybornane-3-ol                                 |
| 31 | 49.599 | 0.06 | Phenyl acetaldehyde                                   |
| 32 | 49.800 | 0.11 | Decanoic acid, ethyl ester                            |
| 33 | 50.026 | 0.09 | 1,3-Cyclohexadiene-1-carboxaldehyde, 2,6,6-trimethyl- |
| 34 | 50.790 | 0.07 | 2-Furanmethanol                                       |
| 35 | 51.174 | 0.22 | Benzoic acid, ethyl ester                             |
| 36 | 51.596 | 0.23 | Cyclooctasiloxane, hexadecamethyl-                    |
| 37 | 51.788 | 0.32 | Butanedioic acid, diethyl ester                       |
| 38 | 57.162 | 0.09 | Benzoic acid, 2-hydroxy-, methyl ester                |
| 39 | 57.807 | 0.37 | Acetic acid, phenyl-, ethyl ester                     |
| 40 | 58.906 | 0.10 | Dodecanoic acid, methyl ester                         |
| 41 | 59.428 | 0.07 | B-Phenylethyl acetate                                 |
| 42 | 59.675 | 0.24 | Silanediol, dimethyl-                                 |
| 43 | 60.344 | 0.03 | Cyclononasiloxane, octadecamethyl-                    |
| 44 | 61.125 | 0.88 | Dodecanoic acid, ethyl ester                          |

|    |        |       |                                                                  |
|----|--------|-------|------------------------------------------------------------------|
| 45 | 61.595 | 0.10  | 5,9-Undecadien-2-one, 6,10-dimethyl-, (E)-                       |
| 46 | 63.092 | 1.19  | Benzenepropanoic acid, ethyl ester                               |
| 47 | 64.419 | 1.02  | Benzeneethanol                                                   |
| 48 | 65.293 | 0.09  | Benzeneacetaldehyde, .alpha.-ethylidene-                         |
| 49 | 65.950 | 0.08  | 3-Buten-2-one, 4-(2,6,6-trimethyl-1-cyclohexen-1-yl) -           |
| 50 | 67.340 | 0.07  | Ethanone, 1-(1H-pyrrol-2-yl)-                                    |
| 51 | 69.541 | 0.16  | Myristic acid, methyl ester                                      |
| 52 | 70.229 | 1.40  | Benzeneethanol, 2-methoxy-                                       |
| 53 | 71.479 | 2.96  | Tetradecanoic acid, ethyl ester                                  |
| 54 | 72.435 | 0.05  | 5-Methyl-2-phenyl-2-hexenal                                      |
| 55 | 74.045 | 0.09  | Pentadecanoic acid, ethyl ester                                  |
| 56 | 74.160 | 1.11  | 1,4,7,10,13,16-Hexaoxacyclooctadecane                            |
| 57 | 74.751 | 0.05  | Ethyl 13-methyl-tetradecanoate                                   |
| 58 | 76.146 | 0.06  | Diallylvinylmethylsilane                                         |
| 59 | 76.327 | 0.10  | Pentadecanoic acid, ethyl ester                                  |
| 60 | 77.056 | 0.10  | Phenol, 4-ethyl-                                                 |
| 61 | 77.934 | 0.08  | 2-Methoxy-5-vinylphenol                                          |
| 62 | 79.013 | 0.08  | (E)-1-Methyl-3-(prop-1-en-1-yl)trisulfane                        |
| 63 | 79.279 | 0.28  | Hexadecanoic acid, methyl ester                                  |
| 64 | 80.468 | 0.14  | Octaethylene glycol monododecyl ether                            |
| 65 | 81.015 | 19.91 | Hexadecanoic acid, ethyl ester                                   |
| 66 | 82.121 | 0.45  | Ethyl 9-hexadecenoate                                            |
| 67 | 84.574 | 0.12  | 2(4H)-Benzofuranone, 5,6,7,7a-tetrahydro-4,4,7a-trimethyl-, (R)- |
| 68 | 89.082 | 0.24  | 9-Octadecenoic acid (Z)-, methyl ester                           |

|              |        |       |                                                      |
|--------------|--------|-------|------------------------------------------------------|
| 69           | 89.731 | 0.71  | Octadecanoic acid, ethyl ester                       |
| 70           | 90.527 | 5.92  | Ethyl oleate                                         |
| 71           | 90.860 | 0.55  | (E)-9-Octadecenoic acid ethyl ester                  |
| 72           | 91.041 | 0.94  | 9,12-Octadecadienoic acid (Z,Z)-,methyl ester        |
| 73           | 92.445 | 15.75 | Linoleic acid ethyl ester                            |
| 74           | 94.471 | 2.10  | 9,12,15-Octadecatrienoic acid, ethyl ester, (Z,Z,Z)- |
| 75           | 99.651 | 0.13  | 3,6,9,12,15-Pentaoxanonadecan-1-ol                   |
| <b>Go-34</b> |        |       |                                                      |
| 1            | 4.409  | 1.58  | 2-Methoxy-N-methylethylamine                         |
| 2            | 7.672  | 4.84  | Ethyl acetate                                        |
| 3            | 9.109  | 26.49 | Ethanol                                              |
| 4            | 11.982 | 0.40  | Acetic acid, 2-methyl-propyl este                    |
| 5            | 15.261 | 0.08  | 1,5-Pentanediol                                      |
| 6            | 15.954 | 0.67  | 1-Propanol, 2-methyl-                                |
| 7            | 17.607 | 9.01  | 1-Butanol, 3-methyl, acetate                         |
| 8            | 18.527 | 0.08  | 1,4-Dimethylbenzene                                  |
| 9            | 19.919 | 0.18  | Cyclopentasiloxane, decamethyl-                      |
| 10           | 22.880 | 2.89  | 1-Butanol, 3-methyl                                  |
| 11           | 24.249 | 0.12  | Furan, 2-pentyl-                                     |
| 12           | 24.485 | 0.05  | Ethyl hezanoate                                      |
| 13           | 26.960 | 0.08  | Acetic acid, hexyl ester                             |
| 14           | 30.136 | 0.17  | Heptenal                                             |
| 15           | 31.121 | 1.39  | Cyclopentasiloxane, decamethyl-                      |
| 16           | 31.384 | 0.29  | Ethyl 2-hydroxypropanoate                            |

|    |        |      |                                    |
|----|--------|------|------------------------------------|
| 17 | 32.273 | 0.07 | Formic acid, hexyl ester           |
| 18 | 32.467 | 0.23 | Tridecane, 2-methyl-               |
| 19 | 32.742 | 0.06 | 4-Aminopyrimidine                  |
| 20 | 33.698 | 0.11 | 1-Propanol, 3-ethoxy-              |
| 21 | 34.716 | 0.13 | Nonanal                            |
| 22 | 35.264 | 0.13 | Tetradecane                        |
| 23 | 35.486 | 0.10 | Pyrazine, trimethyl-               |
| 24 | 36.926 | 0.11 | 3-Dodecen-1-al                     |
| 25 | 37.444 | 0.17 | Octanoic acid, ethyl ester         |
| 26 | 38.812 | 5.23 | 2-Furan-carboxaldehyde             |
| 27 | 39.480 | 1.17 | Acetic acid                        |
| 28 | 40.000 | 1.14 | Pyrazine, tetramethyl-             |
| 29 | 41.443 | 0.23 | (3E, 5E)-Hepta-3,5-dien-2-one      |
| 30 | 41.536 | 0.20 | Pentadecane                        |
| 31 | 47.798 | 0.94 | Tetradecamethylcycloheptasiloxane  |
| 32 | 42.526 | 0.86 | Benzaldehyde                       |
| 33 | 43.456 | 0.50 | 2-Furanmethanol, acetate           |
| 34 | 44.366 | 0.60 | 1,6-Octadien-3-ol, 3,7-dimethyl-   |
| 35 | 44.924 | 0.15 | Hentriacontane                     |
| 36 | 45.567 | 0.20 | 1H-Pyrazole, 1,3,5-trimethyl-      |
| 37 | 46.062 | 0.86 | 2,3-Butanediol                     |
| 38 | 46.891 | 0.23 | 5-Hepten-2-one, 3-methylene-       |
| 39 | 47.549 | 0.15 | Hexadecane                         |
| 40 | 48.049 | 0.10 | 2,3-Epoxy-1-(methoxymethoxy)gerani |

|    |        |       |                                                                                                    |
|----|--------|-------|----------------------------------------------------------------------------------------------------|
| 41 | 48.535 | 0.07  | Bezaldehyde, 2-methyl-                                                                             |
| 42 | 48.627 | 0.16  | 1-Cyclohezene-1-carboxaldehyde, 2,6,6-trimethyl                                                    |
| 43 | 49.617 | 0.20  | Benzeneacetaldehyde                                                                                |
| 44 | 49.655 | 0.08  | Phenyl acetaldehyde                                                                                |
| 45 | 49.788 | 0.37  | Pentadecanoic acid, ethyl ester                                                                    |
| 46 | 50.012 | 0.32  | Oxirane, [(phenylmethoxy)methyl]-                                                                  |
| 47 | 50.274 | 0.40  | Silanediol, dimethyl-                                                                              |
| 48 | 50.788 | 0.79  | 2-Furanmethanol                                                                                    |
| 49 | 51.183 | 0.15  | Pyrimidine, 4-amino-2-methoxy-                                                                     |
| 50 | 51.604 | 0.07  | Cyclooctasiloxane, hexadecamethyl-                                                                 |
| 51 | 52.935 | 0.11  | 5-Hydroxy-6-methoxy-8-[(4-amino-1-methylbutyl)amino]quinoline trihydrobromide                      |
| 52 | 53.122 | 0.21  | .Beta. Fenchyl alcohol                                                                             |
| 53 | 53.316 | 0.15  | 1,1,7-Trimethyl-4-methylenedecahydro-1H-cyclopropa[E]azulene                                       |
| 54 | 54.086 | 1.19  | Ethanol, 2-bromo-                                                                                  |
| 55 | 54.384 | 2.18  | 1,3-Cyclohezadiene, 5-(1,5-dimethy 1-4-hexenyl)-2-methyl-, [S-(R <sup>*</sup> , S <sup>*</sup> )]- |
| 56 | 54.644 | 1.65  | Acetic acid, phenylmethyl ester                                                                    |
| 57 | 57.161 | 0.75  | Benzoic acid, 2-hydroxy-, methyl ester                                                             |
| 58 | 58.920 | 0.22  | Ethyl 4-hydroxybutanoate                                                                           |
| 59 | 59.156 | 0.18  | 2,4-Decadienal, (E,E)-                                                                             |
| 60 | 59.419 | 10.84 | Acetic acid, 2-phenylethyl ester                                                                   |
| 61 | 59.690 | 0.10  | Silanediol, dimethyl-                                                                              |
| 62 | 61.124 | 0.16  | Dodecanoic acid, ethyl ester                                                                       |
| 63 | 61.599 | 0.11  | 2-Cyclopenten-1-one, 2,3,4-trimethyl-                                                              |
| 64 | 62.597 | 0.55  | Benzenemethanol                                                                                    |

|              |        |       |                                                                  |
|--------------|--------|-------|------------------------------------------------------------------|
| 65           | 63.041 | 0.13  | Propanoic acid, 2-phenylethyl este.beta.-Phenylethyl butyrate    |
| 66           | 64.419 | 9.45  | Benzeneethanol                                                   |
| 67           | 65.947 | 0.16  | (3E)-4-(2,6,6-Trimethyl-1-cyclohexen-1-yl)-3-buten-2-one         |
| 68           | 66.800 | 0.19  | 4H-Pyran-4-one, 3-hydroxy-2, 6-dimethyl-                         |
| 69           | 67.340 | 0.94  | Ethanone, 1-(1H-pyrrol-2-yl)-                                    |
| 70           | 67.957 | 0.06  | 4H-Pyran-4-one, 3-hydroxy-2-dimethyl-                            |
| 71           | 68.978 | 0.15  | Phenol                                                           |
| 72           | 70.220 | 0.36  | Gamma, gamma-dimethylallenty-1-butynyl sulfaide                  |
| 73           | 70.399 | 0.15  | Octyldiglycol                                                    |
| 74           | 70.953 | 0.07  | 3,7,11-Trimethyl-3-hydroxy-6, 10-dodecadien-1-yl acetate         |
| 75           | 71.475 | 0.13  | Tetradecanoic acid, ethyl ester                                  |
| 76           | 76.341 | 0.08  | Majapol D                                                        |
| 77           | 77.423 | 0.36  | 15-Crown-5                                                       |
| 78           | 77.930 | 0.63  | 2-Methoxy-4-vinylphenol                                          |
| 79           | 80.971 | 1.00  | Hexadecanoic acid, methyl ester                                  |
| 80           | 84.575 | 0.24  | 2(4H)-Benzofuranone, 5,6,7,7a-tetrahydro-4,4,7a-trimethyl-, (r)- |
| 81           | 86.472 | 2.06  | 1,4,7,10,13,16-Hexaoxacycloocatadecane                           |
| 82           | 96.966 | 0.41  | 21-Krone-7                                                       |
| <b>Go-35</b> |        |       |                                                                  |
| 1            | 7.672  | 0.73  | Acetic acid, ethyl ester                                         |
| 2            | 7.948  | 0.09  | 1-Amino-2-butanol                                                |
| 3            | 8.487  | 0.05  | Butanal, 3-methyl-                                               |
| 4            | 9.120  | 14.01 | Ethanol                                                          |
| 5            | 15.894 | 0.19  | 1-Propanol, 2-methyl-                                            |

|    |        |      |                                                 |
|----|--------|------|-------------------------------------------------|
| 6  | 17.625 | 0.04 | (1-Hydroxyethylidene)malonic acid diethyl ester |
| 7  | 19.925 | 0.05 | Cyclopentasiloxane, decamethyl-                 |
| 8  | 22.869 | 0.61 | 1-Butanol, 3-methyl-                            |
| 9  | 24.486 | 0.15 | Hexanoic acid, ethyl ester                      |
| 10 | 30.150 | 0.03 | Ethane, 1,1-diethoxy-                           |
| 11 | 30.954 | 0.02 | Heptanoic acid, ethyl ester                     |
| 12 | 31.123 | 0.37 | Cyclohexasiloxane, dodecamethyl-                |
| 13 | 31.381 | 0.07 | Ethyl 2-hydroxypropanoate                       |
| 14 | 32.468 | 0.04 | 1-Decanol, 2,2-dimethyl-                        |
| 15 | 32.746 | 0.04 | 3-Furanacetic acid, .alpha.-oxo-                |
| 16 | 35.261 | 0.03 | Tetradecane, 2,6,10-trimethyl-                  |
| 17 | 35.483 | 0.04 | Pyrazine, trimethyl-                            |
| 18 | 37.447 | 0.32 | Octanoic acid, ethyl ester                      |
| 19 | 38.812 | 1.65 | Furfural                                        |
| 20 | 39.256 | 0.03 | 5-Hepten-2-ol, 6-methyl-                        |
| 21 | 39.995 | 0.29 | 2,3,5,6 Tetramethyl pyrazine                    |
| 22 | 40.882 | 0.08 | D-(+)-Xylose, tetramethyl ether                 |
| 23 | 41.445 | 0.12 | Ethanone, 1-(2-furanyl)-                        |
| 24 | 41.798 | 0.31 | Cycloheptasiloxane, tetradecamethyl-            |
| 25 | 42.523 | 0.22 | Benzaldehyde                                    |
| 26 | 43.743 | 0.05 | Nonanoic acid, ethyl ester                      |
| 27 | 43.863 | 0.09 | 2,3-Butanediol                                  |
| 28 | 44.064 | 0.05 | Propane, 1,1'-[ethylidenebis(oxy)]bis-          |
| 29 | 44.366 | 0.09 | 1,6-Octadien-3-ol, 3,7-dimethyl-                |

|    |        |      |                                                                               |
|----|--------|------|-------------------------------------------------------------------------------|
| 30 | 44.928 | 0.02 | Heneicosane                                                                   |
| 31 | 45.554 | 0.15 | 2-Furancarboxaldehyde, 5-methyl-                                              |
| 32 | 45.789 | 0.03 | 1-Propanone, 1-(2-furanyl)-                                                   |
| 33 | 46.058 | 0.20 | 2,3-Butanediol                                                                |
| 34 | 47.014 | 0.12 | Dodecanoic acid, ethyl ester                                                  |
| 35 | 47.542 | 0.05 | (1R*,4R/S*,5S*)-4,5-Dimethyl-9-oxabicyclo[3.3.1]nonan-1-ol                    |
| 36 | 48.059 | 0.23 | Neopentylidenecyclohexane                                                     |
| 37 | 48.537 | 0.06 | Benzoic acid, methyl ester                                                    |
| 38 | 48.623 | 0.05 | 1-Cyclohexene-1-carboxaldehyde, 2,6,6-trimethyl-                              |
| 39 | 49.664 | 0.10 | Benzeneacetaldehyde                                                           |
| 40 | 49.800 | 0.22 | Decanoic acid, ethyl ester                                                    |
| 41 | 50.022 | 0.11 | 1,3-Cyclohexadiene-1-carboxaldehyde, 2,6,6-trimethyl-                         |
| 42 | 50.783 | 0.32 | 2-Furanmethanol                                                               |
| 43 | 51.180 | 0.20 | Benzoic acid, ethyl ester                                                     |
| 44 | 51.600 | 0.02 | Cystine, TBS 2X                                                               |
| 45 | 51.791 | 0.14 | Butanedioic acid, diethyl ester                                               |
| 46 | 52.599 | 0.04 | 2,6,6-Trimethyl-2-cyclohexene-1,4-dione                                       |
| 47 | 52.935 | 0.06 | 5-Hydroxy-6-methoxy-8-[(4-amino-1-methylbutyl)amino]quinoline trihydrobromide |
| 48 | 53.116 | 0.07 | Cyclofenchene                                                                 |
| 49 | 57.164 | 0.11 | Benzoic acid, 2-hydroxy-, methyl ester                                        |
| 50 | 57.806 | 0.06 | Acetic acid, phenyl-, ethyl ester                                             |
| 51 | 58.343 | 0.08 | Ethanone, 1-(2-furanyl)-                                                      |
| 52 | 58.902 | 0.05 | Dodecanoic acid, methyl ester                                                 |
| 53 | 59.420 | 0.20 | Acetic acid, 2-phenylethyl ester                                              |



|    |        |       |                                                           |
|----|--------|-------|-----------------------------------------------------------|
| 54 | 59.704 | 0.04  | Silanediol, dimethyl-                                     |
| 55 | 61.128 | 1.39  | Dodecanoic acidm ethyl ester                              |
| 56 | 61.602 | 0.07  | 1,1-Dimethyl-1-silacyclo-2,4-hexadiene                    |
| 57 | 64.416 | 1.19  | Benzeneethanol                                            |
| 58 | 65.283 | 0.08  | Benzeneacetaldehyde, .alpha.-ethylidene-                  |
| 59 | 65.951 | 0.10  | 3-Buten-2-one, 4-(2,6,6-trimethyl-1-cyclohexen-1-yl)-     |
| 60 | 66.796 | 0.08  | 2-Methyl-3-methoxy-4H-pyran-4-one                         |
| 61 | 67.341 | 0.17  | Ethanone, 1- (1H-pyrrol-2-yl)-                            |
| 62 | 69.54  | 0.10  | Myristic acid, methyl ester                               |
| 63 | 70.216 | 0.05  | 1,3-Butadiene, 1-(ethylthio)-                             |
| 64 | 70.963 | 0.05  | (6E)-3-Hydroxy-3,7,11-trimethyl-6,10-dodecadienyl acetate |
| 65 | 71.477 | 3.22  | Tetradecanoic acid, ethyl ester                           |
| 66 | 73.636 | 0.06  | Nicotinyl alcohol                                         |
| 67 | 74.035 | 0.32  | Ethyl 13-methyl-tetradecanoate                            |
| 68 | 74.145 | 0.05  | Diethyl suberate                                          |
| 69 | 74.753 | 0.04  | Tetradecanoic acid, 2-methyl-, methyl ester               |
| 70 | 76.144 | 0.16  | Furan, 2-(1,2-dimethoxyethyl)-                            |
| 71 | 76.325 | 0.14  | Pentadecanoic acid, ethyl ester                           |
| 72 | 77.344 | 0.11  | 15-Crown-5                                                |
| 73 | 77.934 | 0.10  | 2-Methoxy-4-vinylphenol                                   |
| 74 | 79.015 | 0.16  | Diethyl azelate                                           |
| 75 | 79.275 | 1.10  | Hexadecanoic acid, methyl ester                           |
| 76 | 81.022 | 25.09 | Hexadecanoic acid, ethyl ester                            |
| 77 | 82.119 | 1.11  | Ethyl 9-hexadecenoate                                     |

---

|    |        |       |                                                                  |
|----|--------|-------|------------------------------------------------------------------|
| 78 | 84.568 | 0.19  | 2(4H)-Benzofuranone, 5,6,7,7a-tetrahydro-4,4,7a-trimethyl-, (R)- |
| 79 | 85.427 | 0.08  | Heptadecanoic acid, ethyl ester                                  |
| 80 | 89.077 | 0.42  | 9-Octadecenoic acid, methyl ester, (E)-                          |
| 81 | 89.728 | 1.02  | Octadecanoic acid, ethyl ester                                   |
| 82 | 90.525 | 6.98  | Ethyl (9Z)-9-octadecenoate                                       |
| 83 | 90.859 | 0.88  | (E)-9-Octadecenoic acid ethyl ester                              |
| 84 | 91.040 | 1.46  | 9,12-Octadecadienoic acid (Z,Z)-,methyl ester                    |
| 85 | 92.462 | 25.58 | Linoleic acid ethyl ester                                        |
| 86 | 94.470 | 4.16  | 9,12,15-Octadecatrienoic acid, ethyl ester, (Z,Z,Z)-             |
| 87 | 96.971 | 1.76  | 1,4,7,10,13,16-Hexaoxacyclooctadecane                            |

---
